# Supplementary material for: Global, regional, and national burden of ischaemic heart disease and its attributable risk factors, 1990–2017: results from the Global Burden of Disease Study 2017
Source: PubMed Central journal article supplement — Eur Heart J Qual Care Clin Outcomes. 2020 Oct 5;8(1):50–60. doi: 10.1093/ehjqcco/qcaa076 (PMC8728029; doi:10.1093/ehjqcco/qcaa076), 2020-10-05
Supplement: qcaa076_supplementary_data.pdf [file qcaa076_supplementary_data.pdf]

**Global, regional, and national burden of ischaemic heart disease and its attributable risk factors, 1990–2017: results from the Global Burden of Disease Study 2017**

Haijiang Dai, Arsalan Abu Much, Elad Maor, Elad Asher, Arwa Younis, Yawen Xu, Yao Lu, Xinyao Liu, Jingxian Shu, Nicola Luigi Bragazzi

**Text S1.** Supplemental Methods.....2

**Figure S1.** Trends in numbers and age-standardised rates of prevalent cases (A), incident cases (B), and deaths (C) of ischaemic heart disease at the global level, 1990-2017.....10

**Figure S2.** Trends in numbers and age-standardised rates of YLDs (A) and YLLs (B) of ischaemic heart disease at the global level, 1990-2017.....11

**Figure S3.** Age-specific numbers and rates of YLDs (A) and YLLs (B) of ischaemic heart disease by sex, 2017.....12

**Table S1.** Number of ischaemic heart disease prevalent cases, incident cases, deaths, YLDs, and YLLs in 2017, by sex, SDI quintile, and location.....13

**Table S2.** Age-standardised prevalence, incidence, death, YLD, and YLL rates of ischaemic heart disease for both sexes in 2017, and their percentage changes from 1990 to 2017, by country and territory.....20

**Table S3.** Percentage contribution of major risk factors to ischaemic heart disease age-standardised deaths by SDI quintile and GBD region, 1990-2017.....27

## Text S1. Supplemental Methods

### Estimation of deaths

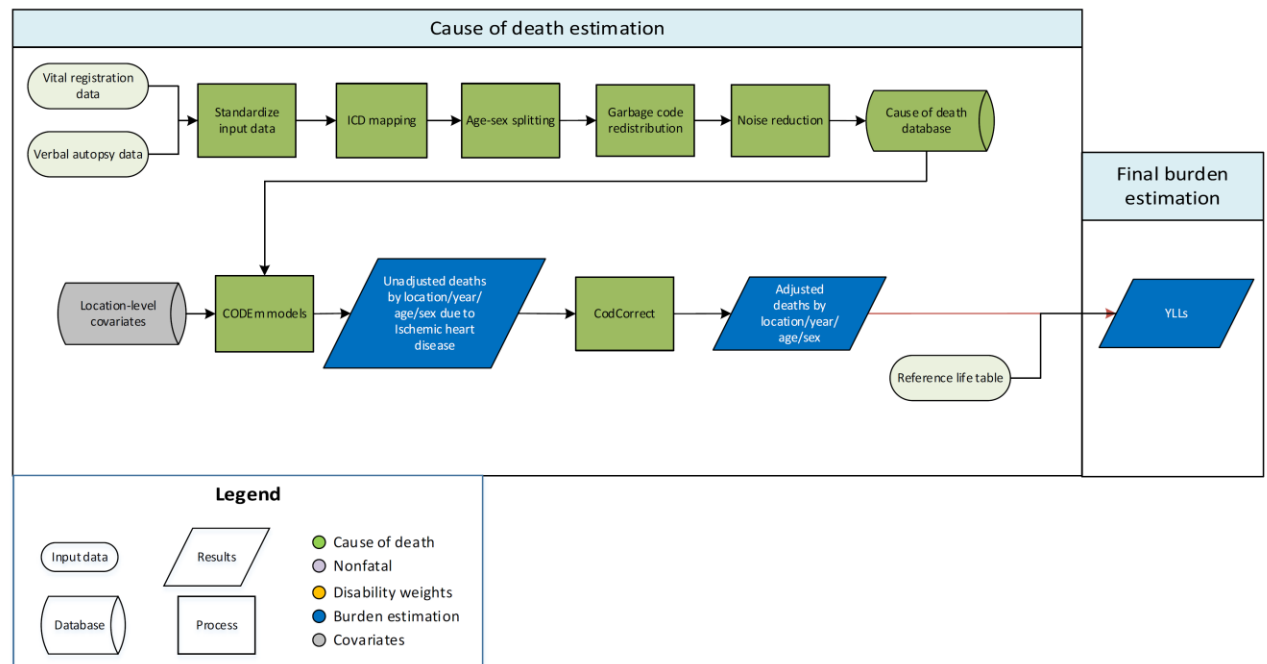

### Input data

Vital registration and verbal autopsy data were used to model ischaemic heart disease (IHD).[1] Notably, verbal autopsy data were marked as outliers in locations where high-quality vital registration data were also available. In addition, non-representative subnational verbal autopsy data points, ICD8 and ICD9 BTL data points which were inconsistent with the rest of the data and created implausible time trends, and data in a number of Indian states identified by experts as poor-quality were also marked as outliers in the present analysis.

### Modelling strategy

Deaths due to IHD were estimated using a standard Cause of Death Ensemble Model (CODEm) approach. Predictive covariates incorporated in the ensemble modelling process were summary exposure variable, cholesterol, smoking prevalence, systolic blood pressure, trans fatty acid, mean BMI, elevation over 1500m, fasting plasma glucose, outdoor pollution (PM 2.5), indoor air pollution, healthcare access and quality index, lag distributed income (LDL) per capita, socio-demographic index, omega-3, fruits, vegetables, nuts and seeds, whole grains, pulses/legumes, polyunsaturated fatty acids, and alcohol. These covariates were chosen on the basis of a possible causal relationship with IHD-specific mortality. All models for IHD-specific mortality were assessed using out-of-sample predictive validity tests and combined into an ensemble of models that perform best.

## Estimation of non-fatal outcomes

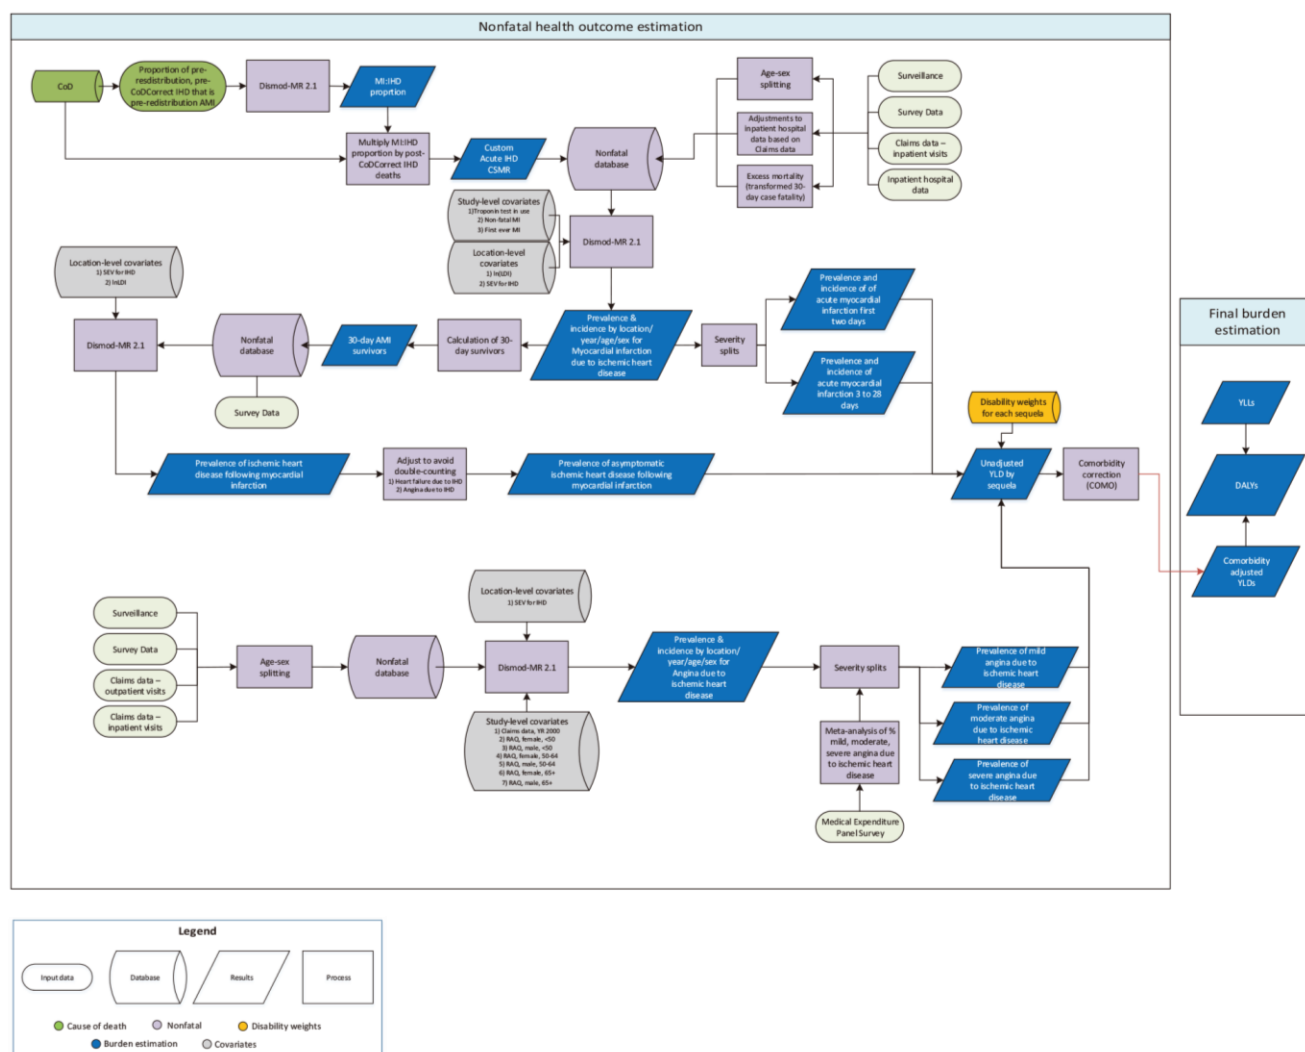

Inpatient hospital data, claims data, survey data, and surveillance data were used in the estimation of non-fatal outcomes of IHD. DisMod-MR 2.1, a Bayesian meta-regression tool developed for the GBD study, was used to estimate the incidence and prevalence of IHD for each location, year, age group, and sex, as described elsewhere.[2] Three health states of IHD were enrolled in the estimation process of non-fatal outcomes, including: myocardial infarction (MI), asymptomatic IHD following MI, and angina.

### Input data

#### Myocardial infarction

Literature data, inpatient hospital data, and inpatient claims data were included for the estimation. Data with broad age ranges where it was impossible to obtain more granular data were excluded, because these data caused the known age pattern for increased risk of MI to be masked in the estimates generated from DisMod.

A study-level covariate was included to correct for the change in diagnostic criteria to include troponin measurements within DisMod, and the correction only applied to data collected before 2000. A study-level covariate was also included to adjust data points within DisMod that captured only first-ever MI, using studies where all events were included as the reference. Moreover, estimates within DisMod from studies that only included non-fatal cases were adjusted using study-level covariates with sources that included fatal and non-fatal cases as reference.

#### *Asymptomatic ischaemic heart disease following myocardial infarction*

The main input were 28-day survivors calculated from the excess mortality estimates from the MI model. Data for excess mortality and standardised mortality ratio were used to inform the estimates of survival after MI.

#### *Angina*

Survey data (including NHANES and World Health Study questionnaires) which included the Rose Angina Questionnaire (RAQ) items were included. Prevalence of angina was calculated using the standard algorithm to determine whether the RAQ was positive or negative.

Similar to MI model, data with broad age ranges where it was impossible to obtain more granular data were excluded, because these data caused the known age pattern for increased risk of angina to be masked in the estimates generated from DisMod.

Sex- and age-group-specific covariates were included to adjust prevalence data points obtained from the RAQ using the claims data as the reference since the RAQ has been shown to be neither sensitive nor specific.

We also included US claims data, but did not include inpatient hospital data from any locations. Stable angina (unstable angina is modeled as part of MI) is expected to be rare in inpatient but common in outpatient data as it is a condition usually managed on an outpatient basis, except for specific surgical interventions. This discrepancy leads to implausible correction factors based on inpatient/outpatient information from claims data (~150X); thus, adjusted data cannot be used. Including uncorrected data in the model is likely to lead to incorrect estimates as hospitalization and procedure rates are likely to vary between geographies based on access to and patterns of care. All outpatient data were excluded as they were implausibly low for all locations when compared with literature and claims data.

## **Modelling strategy**

### *Myocardial infarction*

We first calculated custom cause-specific mortality estimates using cause of death data prior to garbage code redistribution, generating age-sex-country-specific proportions of IHD deaths that were due to MI (acute IHD) versus those due to other causes of IHD (chronic IHD). Estimates of this proportion for all locations were then generated using a DisMod proportion-only model. Due to a high degree of variability in pre-redistribution coding practices by location, we used the global age-, sex-, and year-specific proportions of acute deaths in subsequent calculations. The global proportions were multiplied by post-CoDCorrect (final GBD estimates) IHD deaths to generate cause-specific mortality rate (CSMR) estimates for MI, even though GBD reports only deaths for all IHD taken together. These data, along with incidence and excess mortality data, informed a DisMod model to estimate the prevalence and incidence of MI due to IHD.

These estimates were split into prevalence and incidence estimates for days 1-2 and days 3-28 post-event.

We set a value prior of one month for remission (11/13) from the MI health state. We also set a value prior for the maximum excess mortality rate of 10 for all ages. We included the Healthcare Access and Quality Index as a fixed-effect country-level covariate on excess mortality, forcing an inverse relationship.

### *Asymptomatic ischaemic heart disease following myocardial infarction*

Excess mortality estimates from the MI model were used to generate data of the incidence of surviving 28 days post-event.

We used these data, along with the estimates of CSMR due to chronic IHD and excess mortality data in a DisMod model to estimate the prevalence of persons with IHD following MI. This estimate included subjects with angina and heart failure; a proportion of this prevalence was removed in order to avoid double-counting based on evidence from the literature. The result of this step generates estimates of asymptomatic IHD following MI.

We set a value prior of 0 for remission for all ages.

We also included the log-transformed, age-standardised summary exposure value scalar for IHD as a fixed effect, country-level covariate on prevalence and LDL (I\$ per capita) as a fixed-

effect country-level covariate on excess mortality, forcing an inverse relationship for LDL.

### Angina

We used prevalence data from the literature and USA claims databases, along with data on mortality risk to estimate the prevalence and incidence of angina for all locations.

The proportion of mild, moderate, and severe angina was determined by the standard approach for severity splitting for GBD 2017.

We included a value prior of 0 for remission for all ages. We also included a value prior of 1 for excess mortality for all ages.

We included age- and sex-specific study-level covariates to adjust data points based on RAQ, using data points from the claims database as the reference.

We also included the log-transformed, age-standardised summary exposure value scalar for IHD as a fixed effect, country-level covariate on prevalence and LDI (I\$ per capita) as a fixed effect, country-level covariate on excess mortality, forcing an inverse relationship LDI.

### **Disability weights**

Acute MI was divided into two severity levels according to length of time: days 1-2, and days 3-28. Angina was divided into asymptomatic, mild, moderate, and severe groups based on information from Medical Expenditure Panel Surveys.[3] Asymptomatic IHD following MI was all assigned to the asymptomatic severity level. Each severity level of IHD was assigned a disability weight, which represents the magnitude of health loss associated with the severity level. These disability weights were derived from nine population surveys and an open-access internet survey using pairwise comparison methods.[4] Disability weight was measured on a scale from 0 to 1, with 0 implying a state that is equivalent to full health and 1 a state equivalent to death.[4] More details about the estimation process of disability weight can be found elsewhere.[2, 4] The lay description and disability weight for each severity level of IHD were shown in the Table below.

**Table.** Severity levels of ischaemic heart disease, and their lay descriptions and disability weights

| Severity level               | Lay description                                                                 | Disability weight (95% CI) |
|------------------------------|---------------------------------------------------------------------------------|----------------------------|
| Acute myocardial infarction, | Has severe chest pain that becomes worse with any physical activity. The person | 0.432 (0.288 to 0.579)     |

|                                        |                                                                                                                                                                                                           |                        |
|----------------------------------------|-----------------------------------------------------------------------------------------------------------------------------------------------------------------------------------------------------------|------------------------|
| days 1-2                               | feels nauseated, short of breath, and very anxious.                                                                                                                                                       |                        |
| Acute myocardial infarction, days 3-28 | Gets short of breath after heavy physical activity, and tires easily, but has no problems when at rest. The person has to take medication every day and has some anxiety.                                 | 0.074 (0.049 to 0.105) |
| Asymptomatic ischaemic heart disease   |                                                                                                                                                                                                           | N/A                    |
| Mild angina                            | Has chest pain that occurs with strenuous physical activity, such as running or lifting heavy objects. After a brief rest, the pain goes away.                                                            | 0.033 (0.02 to 0.052)  |
| Moderate angina                        | Has chest pain that occurs with moderate physical activity, such as walking uphill or more than half a kilometer (around a quarter-mile) on level ground. After a brief rest, the pain goes away.         | 0.08 (0.052 to 0.113)  |
| Severe angina                          | Has chest pain that occurs with minimal physical activity, such as walking only a short distance. After a brief rest, the pain goes away. The person avoids most physical activities because of the pain. | 0.167 (0.11 to 0.24)   |

## Risk factors

We extracted relative risk and exposure estimates for risk factors from all available data sources that could be accessed, including randomized controlled trials, cohort studies, household surveys, census data, and other data sources. We used the comparative risk assessment framework to estimate the proportions of IHD deaths attributable to potentially modifiable risk factors, as described elsewhere.[5] We used the counterfactual scenario of theoretical minimum risk exposure level to model the population attributable fraction, which represented the proportional reduction in age-standardised IHD deaths that would occur if the exposure to a risk factor was reduced to the theoretical minimum exposure level. For each risk factor, the theoretical minimum risk exposure level was established as the lowest level of risk exposure below which its causation with a disease outcome is not supported by the available evidence. The definition and theoretical minimum risk exposure level for each risk factor of IHD have been described in the Table below.

**Table.** Definition and theoretical minimum risk exposure level for each risk factor of ischaemic heart disease

| Risk factors             | Definition                                                                                                                                                                                                     | Theoretical minimum risk exposure level       |
|--------------------------|----------------------------------------------------------------------------------------------------------------------------------------------------------------------------------------------------------------|-----------------------------------------------|
| <b>Dietary risks</b>     |                                                                                                                                                                                                                |                                               |
| Diet low in fruits       | Average daily consumption of fruits (fresh, frozen, cooked, canned, or dried, excluding fruit juices and salted or pickled fruits)                                                                             | Consumption of fruit 200–300 g per day        |
| Diet low in vegetables   | Average daily consumption of vegetables (fresh, frozen, cooked, canned, or dried, excluding legumes and salted or pickled vegetables, juices, nuts and seeds, and starchy vegetables such as potatoes or corn) | Consumption of vegetables 290–430 g per day   |
| Diet low in whole grains | Average daily consumption of whole grains (bran, germ, and endosperm in their natural proportion) from breakfast cereals, bread, rice, pasta, biscuits, muffins, tortillas, pancakes, and                      | Consumption of whole grains 100–150 g per day |

|                                         |                                                                                                                                                                                                                                                                                        |                                                                                                                                                                                                                                                                                                                                                                        |
|-----------------------------------------|----------------------------------------------------------------------------------------------------------------------------------------------------------------------------------------------------------------------------------------------------------------------------------------|------------------------------------------------------------------------------------------------------------------------------------------------------------------------------------------------------------------------------------------------------------------------------------------------------------------------------------------------------------------------|
|                                         | other sources                                                                                                                                                                                                                                                                          |                                                                                                                                                                                                                                                                                                                                                                        |
| Diet low in nuts and seeds              | Average daily consumption of nut and seed foods                                                                                                                                                                                                                                        | Consumption of nuts and seeds 16–25 g per day                                                                                                                                                                                                                                                                                                                          |
| Diet high in processed meat             | Average daily consumption of meat preserved by smoking, curing, salting, or addition of chemical preservatives                                                                                                                                                                         | Consumption of processed meat 0–4 g per day                                                                                                                                                                                                                                                                                                                            |
| Diet high in sugar-sweetened beverages  | Average daily consumption of beverages with $\geq 50$ kcal per 226.8 g serving, including carbonated beverages, sodas, energy drinks, fruit drinks, but excluding 100% fruit and vegetable juices                                                                                      | Consumption of sugar-sweetened beverages 0–5 g per day                                                                                                                                                                                                                                                                                                                 |
| Diet low in fiber                       | Average daily intake of fiber from all sources including fruits, vegetables, grains, legumes, and pulses                                                                                                                                                                               | Consumption of fiber 19–28 g per day                                                                                                                                                                                                                                                                                                                                   |
| Diet low in seafood omega-3 fatty acids | Average daily intake of eicosapentaenoic acid and docosahexaenoic acid                                                                                                                                                                                                                 | Consumption of seafood omega 3 fatty acids 200–300 mg per day                                                                                                                                                                                                                                                                                                          |
| Diet low in polyunsaturated fatty acids | Average daily intake of omega 6 fatty acids from all sources, mainly liquid vegetable oils, including soybean oil, corn oil, and safflower oil                                                                                                                                         | Consumption of polyunsaturated fatty acids as 9–13% of total daily energy                                                                                                                                                                                                                                                                                              |
| Diet high in trans fatty acids          | Average daily intake of trans fat from all sources, mainly partially hydrogenated vegetable oils and ruminant products                                                                                                                                                                 | Consumption of trans fatty acids as 0–1% of total daily energy                                                                                                                                                                                                                                                                                                         |
| Diet high in sodium                     | 24-h urinary sodium measured in g per day                                                                                                                                                                                                                                              | 24-h urinary sodium 1–5 g per day                                                                                                                                                                                                                                                                                                                                      |
| Diet low in legumes                     | Average daily consumption of legumes (fresh, frozen, cooked, canned, or dried legumes)                                                                                                                                                                                                 | Consumption of legumes 50–70 g per day                                                                                                                                                                                                                                                                                                                                 |
| <b>High systolic blood pressure</b>     | Systolic blood pressure, measured in mmHg                                                                                                                                                                                                                                              | 110–115 mmHg                                                                                                                                                                                                                                                                                                                                                           |
| <b>High LDL cholesterol</b>             | Serum LDL, measured in mmol/L                                                                                                                                                                                                                                                          | 0.7–1.3 mmol/L                                                                                                                                                                                                                                                                                                                                                         |
| <b>High fasting plasma glucose</b>      | Serum fasting plasma glucose measured in mmol/L                                                                                                                                                                                                                                        | 4.8–5.4 mmol/L                                                                                                                                                                                                                                                                                                                                                         |
| <b>High body-mass index</b>             | Body-mass index, measured in kg/m <sup>2</sup>                                                                                                                                                                                                                                         | 20–25 kg/m <sup>2</sup>                                                                                                                                                                                                                                                                                                                                                |
| <b>Impaired kidney function</b>         | Proportion of the population with ACR >30 mg/g or GFR <60 mL/min/1.73 m <sup>2</sup> , excluding end-stage renal disease                                                                                                                                                               | GFR >60 mL/min/1.73 m <sup>2</sup> and ACR <30 mg/g                                                                                                                                                                                                                                                                                                                    |
| <b>Alcohol use</b>                      | Average daily alcohol consumption of pure alcohol (measured in g per day) in current drinkers who had consumed alcohol during the past 12 months                                                                                                                                       | Estimated distribution 0–10 g per day                                                                                                                                                                                                                                                                                                                                  |
| <b>Tobacco use</b>                      |                                                                                                                                                                                                                                                                                        |                                                                                                                                                                                                                                                                                                                                                                        |
| Smoking                                 | Prevalence of current use of any smoked tobacco product and prevalence of former use of any smoked tobacco product; among current smokers, cigarette equivalents smoked per smoker per day and cumulative pack-years of exposure; among former smokers, number of years since quitting | All individuals are lifelong non-smokers                                                                                                                                                                                                                                                                                                                               |
| Second-hand smoke                       | Average daily exposure to air particulate matter from second-hand smoke with an aerodynamic diameter smaller than 2.5 $\mu\text{g}$ , measured in $\mu\text{g}/\text{m}^3$ , among non-smokers                                                                                         | No second-hand smoke exposure                                                                                                                                                                                                                                                                                                                                          |
| <b>Low physical activity</b>            | Average weekly physical activity at work, home, transport-related and recreational measured by MET min per week                                                                                                                                                                        | All adults experience 3000–4500 MET min per week                                                                                                                                                                                                                                                                                                                       |
| <b>Air pollution</b>                    |                                                                                                                                                                                                                                                                                        |                                                                                                                                                                                                                                                                                                                                                                        |
| Particulate matter pollution            |                                                                                                                                                                                                                                                                                        |                                                                                                                                                                                                                                                                                                                                                                        |
| Ambient particulate matter pollution    | Annual average daily exposure to outdoor air concentrations of particulate matter with an aerodynamic diameter of $\leq 2.5$ $\mu\text{m}$ (PM <sub>2.5</sub> ), measured in $\mu\text{g}/\text{m}^3$                                                                                  | Joint theoretical minimum risk exposure level for both household and ambient particulate matter pollution is a uniform distribution between 2.4 and 5.9 $\mu\text{g}/\text{m}^3$ , with burden attributed proportionally between household and particulate matter pollution on the basis of source of PM <sub>2.5</sub> exposure in excess of theoretical minimum risk |



|                                          |                                                                       |                                                                                                                                    |
|------------------------------------------|-----------------------------------------------------------------------|------------------------------------------------------------------------------------------------------------------------------------|
|                                          |                                                                       | exposure level                                                                                                                     |
| Household air pollution from solid fuels | Individual exposure to PM2.5 due to use of solid cooking fuel         | See ambient particulate matter pollution (above)                                                                                   |
| <b>Lead exposure</b>                     | Blood lead levels in µg/dL of blood, bone lead levels in µg/g of bone | 2 µg/dL, corresponding to lead levels in pre-industrial humans as natural sources of lead prevent the feasibility of zero exposure |

## References

1. GBD 2017 Causes of Death Collaborators. Global, regional, and national age-sex-specific mortality for 282 causes of death in 195 countries and territories, 1980-2017: a systematic analysis for the Global Burden of Disease Study 2017. *Lancet* 2018, 392(10159):1736-1788.
2. GBD 2017 Disease and Injury Incidence and Prevalence Collaborators. Global, regional, and national incidence, prevalence, and years lived with disability for 354 diseases and injuries for 195 countries and territories, 1990-2017: a systematic analysis for the Global Burden of Disease Study 2017. *Lancet* 2018, 392(10159):1789-1858.
3. Medical Expenditure Panel Survey Home. <https://meps.ahrq.gov/mepsweb/> (accessed September 15, 2020).
4. Salomon JA, Haagsma JA, Davis A, de Noordhout CM, Polinder S, Havelaar AH, Cassini A, Devleesschauwer B, Kretzschmar M, Speybroeck N *et al*: Disability weights for the Global Burden of Disease 2013 study. *Lancet Glob Health* 2015, 3(11):e712-723.
5. GBD 2017 Risk Factor Collaborators. Global, regional, and national comparative risk assessment of 84 behavioural, environmental and occupational, and metabolic risks or clusters of risks for 195 countries and territories, 1990-2017: a systematic analysis for the Global Burden of Disease Study 2017. *Lancet* 2018, 392(10159):1923-1994.

**Figure S1. Trends in numbers and age-standardised rates of prevalent cases (A), incident cases (B), and deaths (C) of ischaemic heart disease at the global level, 1990-2017**

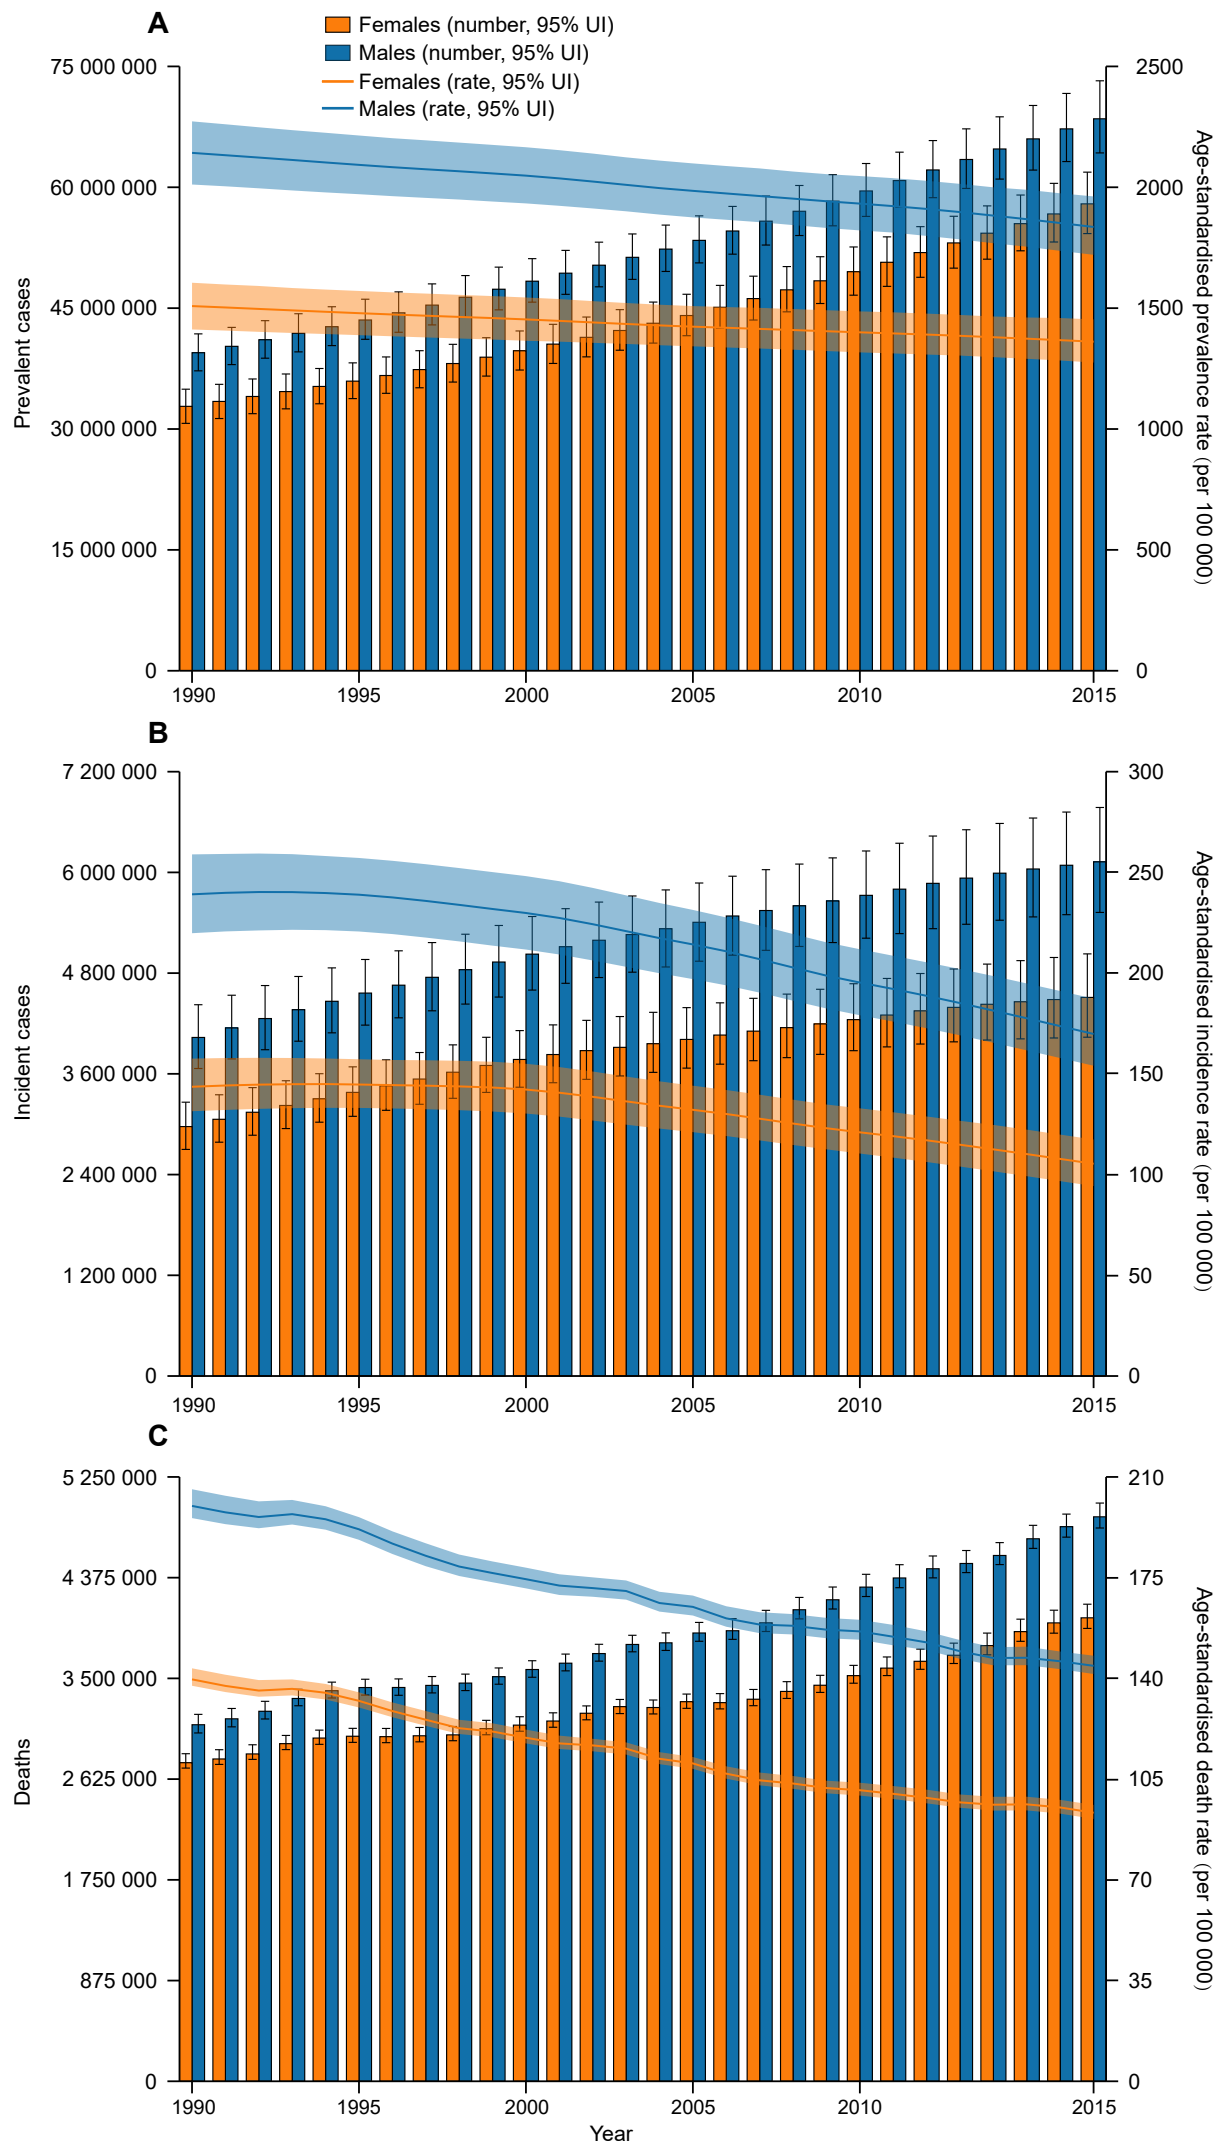

Error bars indicate the 95% uncertainty interval (UI) for numbers. Shading indicates the 95% UI for rates.

**Figure S2. Trends in numbers and age-standardised rates of YLDs (A) and YLLs (B) of ischaemic heart disease at the global level, 1990-2017**

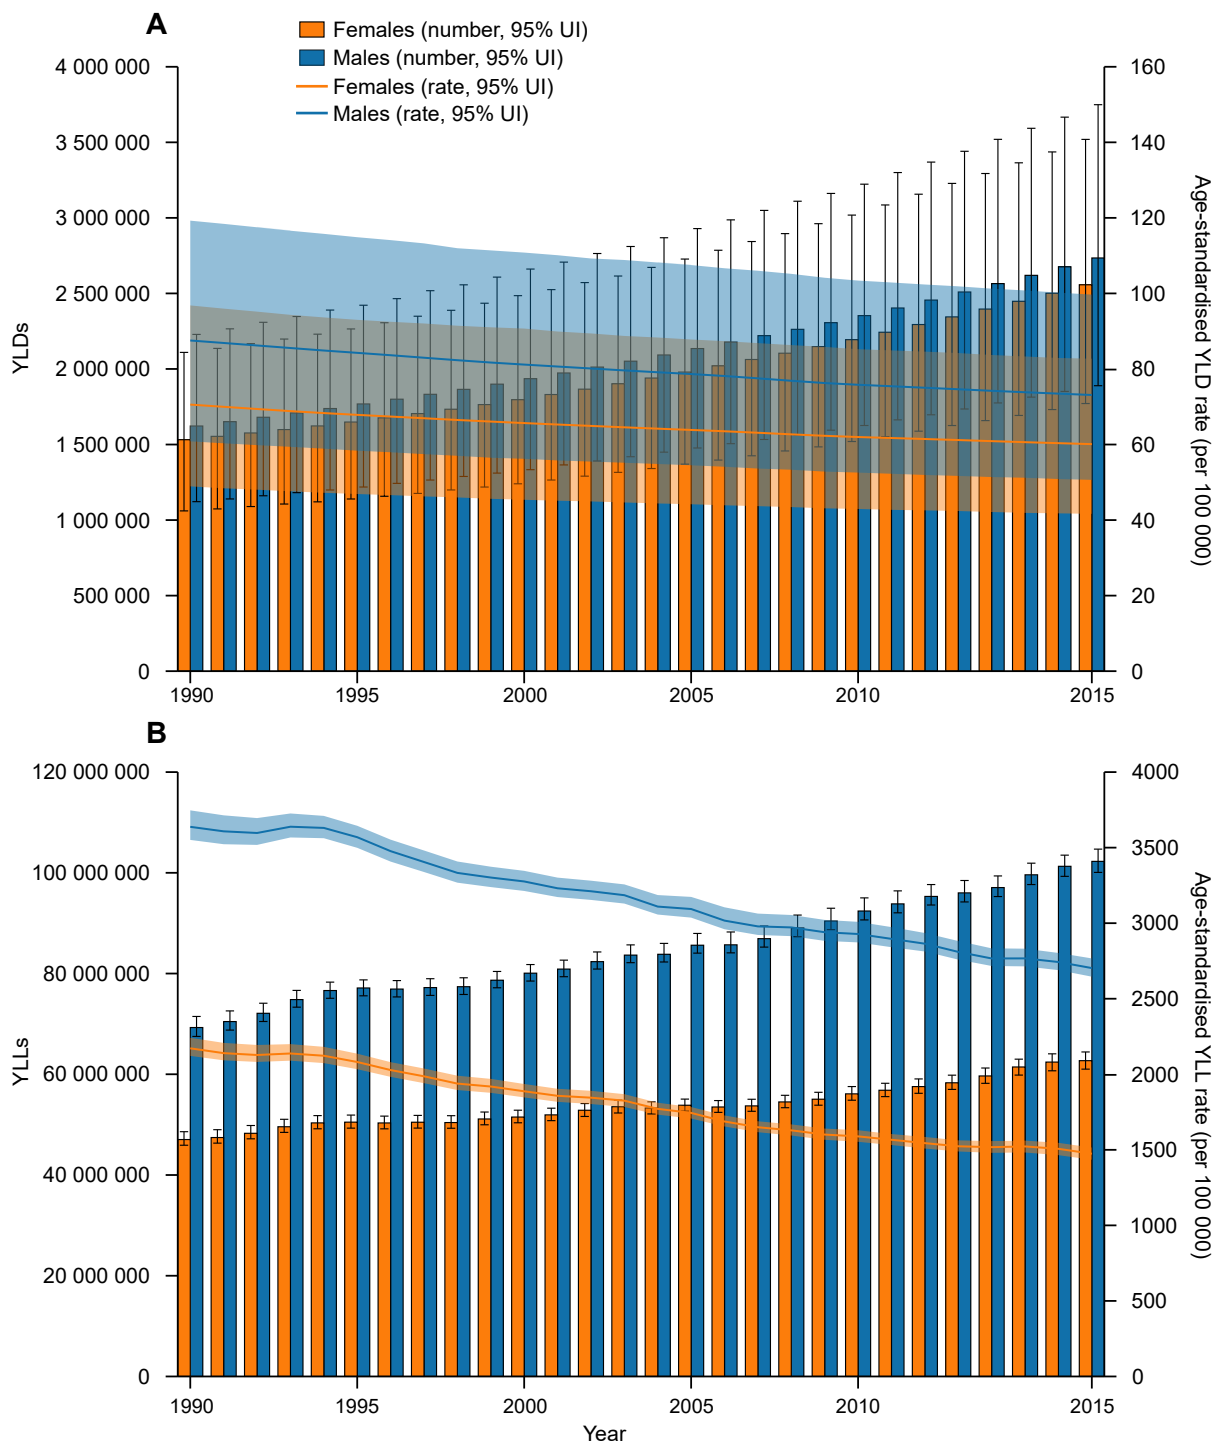

Error bars indicate the 95% uncertainty interval (UI) for numbers. Shading indicates the 95% UI for rates. YLDs= years lived with disability; YLLs= years of life lost.

**Figure S3. Age-specific numbers and rates of YLDs (A) and YLLs (B) of ischaemic heart disease by sex, 2017**

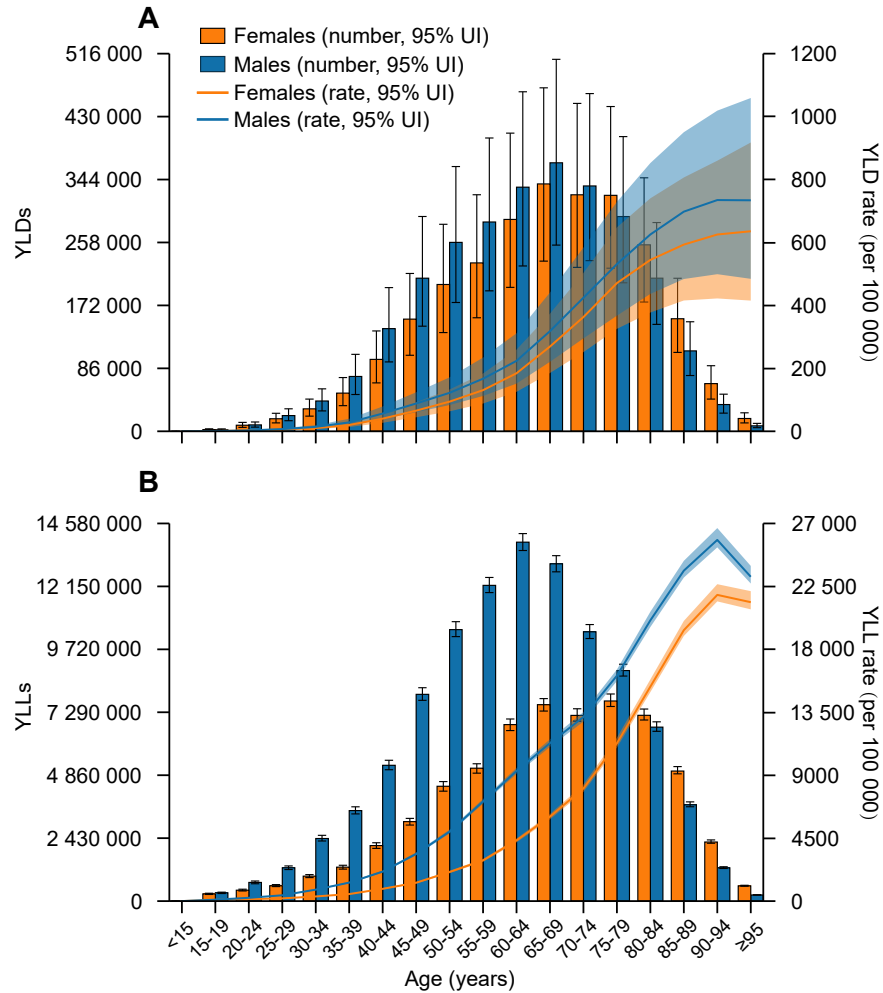

Error bars indicate the 95% uncertainty interval (UI) for numbers. Shading indicates the 95% UI for rates. YLDs= years lived with disability; YLLs= years of life lost.

**Table S1. Number of ischaemic heart disease prevalent cases, incident cases, deaths, YLDs, and YLLs in 2017, by sex, SDI quintile, and location**

|                                     | Prevalence<br>(in thousands)          |                                       | Incidence<br>(in thousands)        |                                    | Deaths<br>(in thousands)           |                                    | YLDs<br>(in thousands)             |                                    | YLLs<br>(in thousands)                |                                          |
|-------------------------------------|---------------------------------------|---------------------------------------|------------------------------------|------------------------------------|------------------------------------|------------------------------------|------------------------------------|------------------------------------|---------------------------------------|------------------------------------------|
|                                     | Females                               | Males                                 | Females                            | Males                              | Females                            | Males                              | Females                            | Males                              | Females                               | Males                                    |
| Global                              | 57,948.2<br>(54,254.2 to<br>61,877.0) | 68,503.3<br>(64,266.1 to<br>73,217.8) | 4,510.6<br>(4,036.5 to<br>5,029.1) | 6,125.9<br>(5,523.0 to<br>6,773.5) | 4,026.4<br>(3,934.1 to<br>4,144.5) | 4,904.0<br>(4,806.6 to<br>5,023.3) | 2,557.2<br>(1,771.2 to<br>3,519.5) | 2,734.7<br>(1,889.1 to<br>3,749.1) | 62,707.4<br>(61,018.9 to<br>64,428.8) | 102,276.0<br>(100,080.3 to<br>104,704.7) |
| Low-SDI quintile                    | 4,824.5 (4,546.7<br>to 5,126.3)       | 6,408.5 (6,037.9<br>to 6,805.7)       | 335.8 (296.5<br>to 379.0)          | 489.0 (437.8<br>to 545.1)          | 315.8 (290.8<br>to 343.2)          | 459.9 (429.6<br>to 490.0)          | 211.6 (145.1<br>to 293.2)          | 284.0 (196.4<br>to 393.1)          | 7,085.5 (6,542.0<br>to 7,655.6)       | 11,529.3<br>(10,838.3 to<br>12,256.1)    |
| Low-middle-SDI quintile             | 8,789.1 (8,268.9<br>to 9,381.2)       | 11,019.7<br>(10,415.6 to<br>11,712.1) | 668.3 (597.7<br>to 742.6)          | 967.1 (877.5<br>to 1060.1)         | 668.5 (625.7<br>to 708.7)          | 949.7 (904.0<br>to 997.6)          | 382.1 (262.9<br>to 528.0)          | 469.4 (322.5<br>to 650.7)          | 14,049.4<br>(13,153.8 to<br>14,855.0) | 23,003.7<br>(21,859.7 to<br>24,204.5)    |
| Middle-SDI quintile                 | 14,778.7<br>(13,857.5 to<br>15,758.8) | 16,190.7<br>(15,208.7 to<br>17,224.2) | 942.7 (832.0<br>to 1062.8)         | 1,233.3<br>(1,097.5 to<br>1,378.8) | 1,001.6<br>(0,966.4 to<br>1,039.5) | 1,320.7<br>(1,277.2 to<br>1,363.2) | 698.5 (482.3<br>to 967.3)          | 742.3 (509.1<br>to 1030.2)         | 16,658.8<br>(16,043.9 to<br>17,299.1) | 28,331.3<br>(27,370.8 to<br>29,233.7)    |
| High-middle-SDI quintile            | 15,761.9<br>(14,756.9 to<br>16,836.6) | 15,126.5<br>(14,174.4 to<br>16,147.3) | 1,150.4<br>(1,019.3 to<br>1,292.7) | 1,379.9<br>(1,229.0 to<br>1,541.3) | 1,213.5<br>(1,183.5 to<br>1,244.5) | 1,272.0<br>(1,239.6 to<br>1,305.2) | 725.4 (502.1<br>to 996.3)          | 613.5 (423.9<br>to 848.2)          | 16,499.9<br>(16,069.6 to<br>16,960.3) | 25,253.3<br>(24,579.9 to<br>25,958.1)    |
| High-SDI quintile                   | 13,550.9<br>(12,514.1 to<br>14,692.9) | 19,541.7<br>(18,101.8 to<br>21,160.5) | 1,399.0<br>(1,268.2 to<br>1,553.7) | 2,038.3<br>(1,844.6 to<br>2,251.5) | 811.2 (785.5<br>to 852.6)          | 882.9 (861.4<br>to 913.6)          | 528.3 (365.6<br>to 715.2)          | 615.9 (431.4<br>to 837.9)          | 8,184.0 (7,937.2<br>to 8,552.9)       | 13,793.3<br>(13,477.6 to<br>14,198.2)    |
| Central Sub-Saharan<br>Africa       | 280.7 (261.8 to<br>301.3)             | 378.2 (354.4 to<br>405.6)             | 26.7 (23.7 to<br>30.4)             | 28.9 (25.3 to<br>33.0)             | 26.6 (21.8 to<br>31.8)             | 26.4 (21.7 to<br>31.1)             | 12.2 (8.5 to<br>17.0)              | 17.5 (11.9 to<br>24.4)             | 547.2 (447.6 to<br>668.8)             | 695.4 (564.9 to<br>830.9)                |
| Angola                              | 49.9 (46.4 to<br>53.5)                | 67.5 (62.9 to<br>72.4)                | 4.2 (3.6 to<br>4.9)                | 5.1 (4.4 to<br>5.8)                | 4.0 (3.1 to<br>5.1)                | 4.8 (3.9 to<br>5.9)                | 2.2 (1.5 to<br>3.0)                | 3.1 (2.1 to<br>4.3)                | 85.0 (64.3 to<br>110.3)               | 127.0 (100.8 to<br>159.6)                |
| Central African Republic            | 10.1 (9.3 to<br>10.9)                 | 15.2 (14.1 to<br>16.4)                | 0.89 (0.77 to<br>1.04)             | 1.2 (1.0 to<br>1.3)                | 1.4 (1.0 to<br>1.9)                | 1.7 (1.3 to<br>2.2)                | 0.45 (0.31 to<br>0.62)             | 0.71 (0.49 to<br>0.97)             | 33.2 (22.9 to<br>45.0)                | 49.1 (36.2 to<br>64.2)                   |
| Congo                               | 12.2 (11.3 to<br>13.2)                | 18.5 (17.2 to<br>19.9)                | 1.0 (0.9 to<br>1.2)                | 1.3 (1.1 to<br>1.5)                | 1.6 (1.2 to<br>2.0)                | 1.4 (1.1 to<br>1.6)                | 0.54 (0.37 to<br>0.74)             | 0.86 (0.59 to<br>1.20)             | 35.6 (26.4 to<br>44.6)                | 34.0 (26.4 to<br>42.2)                   |
| Democratic Republic of<br>the Congo | 201.2 (187.4 to<br>216.9)             | 267.3 (248.9 to<br>287.2)             | 20.0 (17.7 to<br>22.6)             | 20.7 (18.0 to<br>23.5)             | 18.9 (14.8 to<br>23.4)             | 17.8 (13.8 to<br>21.9)             | 8.7 (6.1 to<br>12.1)               | 12.4 (8.4 to<br>17.3)              | 383.4 (294.5 to<br>485.8)             | 468.0 (360.0 to<br>590.4)                |
| Equatorial Guinea                   | 2.0 (1.9 to 2.2)                      | 2.5 (2.3 to 2.6)                      | 0.16 (0.13 to<br>0.18)             | 0.17 (0.15 to<br>0.20)             | 0.14 (0.09 to<br>0.20)             | 0.14 (0.10 to<br>0.19)             | 0.09 (0.06 to<br>0.12)             | 0.11 (0.08 to<br>0.16)             | 2.6 (1.6 to 3.8)                      | 3.1 (2.2 to 4.4)                         |
| Gabon                               | 5.2 (4.8 to 5.7)                      | 7.2 (6.7 to 7.8)                      | 0.40 (0.34 to<br>0.46)             | 0.50 (0.43 to<br>0.59)             | 0.44 (0.34 to<br>0.55)             | 0.59 (0.51 to<br>0.68)             | 0.24 (0.16 to<br>0.32)             | 0.33 (0.23 to<br>0.47)             | 7.4 (5.7 to 9.5)                      | 14.1 (11.8 to<br>17.0)                   |
| Eastern Sub-Saharan<br>Africa       | 920.0 (858.8 to<br>984.8)             | 1,606.9 (1,507.0<br>to 1,715.8)       | 62.2 (53.5 to<br>71.2)             | 90.9 (78.6 to<br>103.9)            | 52.0 (44.6 to<br>59.9)             | 71.7 (64.1 to<br>80.6)             | 46.4 (32.0 to<br>63.9)             | 81.8 (56.6 to<br>113.4)            | 1,068.3 (0,929.4<br>to 1,211.4)       | 1,784.0 (1,600.7<br>to 1,990.6)          |
| Burundi                             | 26.9 (25.1 to<br>28.9)                | 53.5 (49.9 to<br>57.7)                | 1.7 (1.5 to<br>2.0)                | 2.8 (2.3 to<br>3.2)                | 1.7 (1.3 to<br>2.2)                | 2.1 (1.6 to<br>2.6)                | 1.4 (0.9 to<br>1.9)                | 2.7 (1.9 to<br>3.8)                | 38.1 (28.7 to<br>49.9)                | 54.0 (42.3 to<br>68.7)                   |
| Comoros                             | 2.8 (2.6 to 3.1)                      | 4.8 (4.5 to 5.1)                      | 0.18 (0.16 to<br>0.21)             | 0.24 (0.21 to<br>0.28)             | 0.23 (0.18 to<br>0.29)             | 0.26 (0.20 to<br>0.31)             | 0.15 (0.10 to<br>0.20)             | 0.25 (0.17 to<br>0.34)             | 4.6 (3.6 to 5.9)                      | 5.9 (4.4 to 7.4)                         |
| Djibouti                            | 2.9 (2.7 to 3.2)                      | 6.4 (6.0 to 6.9)                      | 0.18 (0.16 to<br>0.21)             | 0.33 (0.28 to<br>0.39)             | 0.18 (0.13 to<br>0.24)             | 0.36 (0.27 to<br>0.47)             | 0.15 (0.11 to<br>0.21)             | 0.33 (0.23 to<br>0.46)             | 3.9 (2.7 to 5.6)                      | 9.7 (7.0 to 13.1)                        |
| Eritrea                             | 12.2 (11.3 to<br>13.1)                | 15.8 (14.6 to<br>17.0)                | 0.86 (0.73 to<br>1.01)             | 0.90 (0.75 to<br>1.05)             | 1.0 (0.7 to<br>1.2)                | 1.0 (0.8 to<br>1.3)                | 0.61 (0.42 to<br>0.84)             | 0.79 (0.54 to<br>1.10)             | 21.9 (15.7 to<br>28.3)                | 33.0 (24.9 to<br>42.7)                   |
| Ethiopia                            | 200.8 (187.3 to<br>215.3)             | 438.7 (411.0 to<br>469.0)             | 14.0 (12.1 to<br>16.1)             | 24.8 (21.4 to<br>28.3)             | 10.8 (8.6 to<br>13.2)              | 15.3 (12.9 to<br>17.8)             | 9.8 (6.6 to<br>13.6)               | 22.0 (15.2 to<br>30.3)             | 224.4 (181.3 to<br>271.2)             | 357.0 (299.9 to<br>414.4)                |
| Kenya                               | 135.3 (125.9 to<br>145.2)             | 243.9 (228.4 to<br>259.9)             | 7.6 (6.5 to<br>8.7)                | 11.0 (9.4 to<br>12.7)              | 6.2 (5.0 to<br>7.6)                | 8.3 (6.9 to<br>9.9)                | 7.1 (4.8 to<br>9.8)                | 12.8 (8.8 to<br>17.8)              | 125.8 (100.8 to<br>149.7)             | 205.3 (171.9 to<br>246.1)                |
| Madagascar                          | 67.5 (62.7 to<br>72.8)                | 119.3 (111.1 to<br>129.2)             | 4.4 (3.8 to<br>5.1)                | 6.5 (5.6 to<br>7.4)                | 4.1 (3.1 to<br>5.2)                | 6.5 (5.0 to<br>8.1)                | 3.4 (2.3 to<br>4.7)                | 6.1 (4.1 to<br>8.4)                | 88.4 (66.2 to<br>113.9)               | 182.8 (137.3 to<br>233.1)                |
| Malawi                              | 58.1 (53.9 to<br>62.8)                | 85.9 (79.7 to<br>92.0)                | 3.8 (3.3 to<br>4.4)                | 4.5 (3.9 to<br>5.2)                | 3.0 (2.3 to<br>3.8)                | 3.8 (3.3 to<br>4.4)                | 3.0 (2.1 to<br>4.2)                | 4.4 (3.0 to<br>6.1)                | 55.0 (42.0 to<br>70.0)                | 92.8 (77.8 to<br>108.8)                  |
| Mozambique                          | 78.7 (72.8 to<br>84.6)                | 118.3 (110.4 to<br>127.4)             | 5.1 (4.4 to<br>5.9)                | 6.4 (5.6 to<br>7.4)                | 4.1 (3.1 to<br>5.2)                | 5.6 (4.7 to<br>6.7)                | 4.0 (2.8 to<br>5.6)                | 6.0 (4.1 to<br>8.4)                | 88.7 (67.2 to<br>112.2)               | 150.5 (124.5 to<br>182.5)                |
| Rwanda                              | 30.6 (28.3 to<br>32.8)                | 40.9 (38.1 to<br>44.0)                | 2.1 (1.8 to<br>2.5)                | 2.4 (2.0 to<br>2.8)                | 1.4 (0.8 to<br>2.0)                | 1.2 (0.8 to<br>2.1)                | 1.5 (1.0 to<br>2.1)                | 2.1 (1.4 to<br>2.9)                | 25.2 (14.4 to<br>36.4)                | 26.9 (17.2 to<br>38.6)                   |
| Somalia                             | 37.7 (34.9 to<br>40.5)                | 65.9 (61.5 to<br>70.7)                | 2.7 (2.3 to<br>3.2)                | 3.8 (3.3 to<br>4.4)                | 3.6 (2.7 to<br>4.7)                | 4.3 (3.2 to<br>5.5)                | 1.9 (1.3 to<br>2.7)                | 3.4 (2.3 to<br>4.7)                | 84.2 (61.7 to<br>111.7)               | 117.9 (86.0 to<br>156.0)                 |
| South Sudan                         | 18.6 (17.3 to<br>20.0)                | 38.9 (36.3 to<br>41.7)                | 1.2 (1.1 to<br>1.4)                | 2.2 (1.9 to<br>2.5)                | 1.3 (1.0 to<br>1.8)                | 2.2 (1.6 to<br>2.9)                | 0.92 (0.63 to<br>1.27)             | 2.0 (1.3 to<br>2.7)                | 29.7 (21.3 to<br>40.3)                | 56.5 (41.3 to<br>76.9)                   |
| Tanzania                            | 136.5 (125.0 to<br>147.8)             | 205.4 (189.9 to<br>220.6)             | 10.2 (8.7 to<br>11.7)              | 14.6 (12.8 to<br>16.6)             | 8.3 (6.6 to<br>10.2)               | 12.3 (10.1 to<br>15.0)             | 6.9 (4.7 to<br>9.6)                | 10.4 (7.1 to<br>14.4)              | 158.1 (125.5 to<br>197.3)             | 278.8 (225.6 to<br>344.7)                |
| Uganda                              | 73.1 (67.7 to<br>78.6)                | 106.6 (99.0 to<br>114.8)              | 5.2 (4.5 to<br>6.0)                | 6.5 (5.6 to<br>7.4)                | 3.8 (2.8 to<br>4.9)                | 5.2 (4.0 to<br>6.4)                | 3.6 (2.5 to<br>5.0)                | 5.4 (3.7 to<br>7.5)                | 70.8 (51.2 to<br>92.4)                | 128.8 (99.5 to<br>161.6)                 |
| Zambia                              | 37.7 (35.1 to<br>40.6)                | 61.6 (57.2 to<br>66.5)                | 2.7 (2.3 to<br>3.1)                | 3.9 (3.3 to<br>4.5)                | 2.3 (1.9 to<br>2.8)                | 3.3 (2.8 to<br>3.7)                | 1.9 (1.3 to<br>2.6)                | 3.1 (2.1 to<br>4.3)                | 48.8 (39.0 to<br>59.6)                | 83.0 (70.1 to<br>97.8)                   |
| Southern Sub-Saharan<br>Africa      | 389.0 (359.1 to<br>419.9)             | 477.2 (446.8 to<br>509.8)             | 30.3 (26.2 to<br>34.7)             | 30.1 (26.0 to<br>34.5)             | 23.7 (22.3 to<br>25.3)             | 21.2 (20.1 to<br>22.3)             | 17.9 (12.4 to<br>24.4)             | 23.0 (16.0 to<br>31.7)             | 415.1 (386.4 to<br>448.1)             | 488.1 (461.5 to<br>516.9)                |
| Botswana                            | 8.9 (8.2 to 9.6)                      | 13.0 (12.1 to<br>13.9)                | 0.63 (0.54 to<br>0.72)             | 0.72 (0.61 to<br>0.83)             | 0.68 (0.59 to<br>0.77)             | 0.42 (0.36 to<br>0.48)             | 0.42 (0.29 to<br>0.55)             | 0.65 (0.45 to<br>0.85)             | 11.9 (10.2 to<br>13.6)                | 8.7 (7.1 to 11.1)                        |

|                            |                              |                              |                       |                        |                     |                        |                      |                       |                              |                              |
|----------------------------|------------------------------|------------------------------|-----------------------|------------------------|---------------------|------------------------|----------------------|-----------------------|------------------------------|------------------------------|
|                            |                              | 14.0)                        | 0.73)                 | 0.83)                  | 0.80)               | 0.53)                  | 0.58)                | 0.89)                 | 14.1)                        |                              |
| Lesotho                    | 8.5 (7.8 to 9.2)             | 10.4 (9.7 to 11.2)           | 0.67 (0.58 to 0.78)   | 0.61 (0.52 to 0.71)    | 0.84 (0.58 to 1.12) | 0.59 (0.46 to 0.73)    | 0.40 (0.28 to 0.54)  | 0.51 (0.35 to 0.71)   | 15.6 (10.4 to 21.0)          | 15.8 (12.2 to 20.0)          |
| Namibia                    | 8.6 (8.0 to 9.3)             | 11.2 (10.3 to 12.0)          | 0.64 (0.55 to 0.74)   | 0.68 (0.58 to 0.78)    | 0.54 (0.42 to 0.69) | 0.70 (0.62 to 0.80)    | 0.41 (0.28 to 0.56)  | 0.55 (0.38 to 0.76)   | 8.0 (6.0 to 10.5)            | 14.6 (12.4 to 17.2)          |
| South Africa               | 310.9 (286.3 to 336.7)       | 363.4 (339.4 to 389.0)       | 23.9 (20.6 to 27.4)   | 23.7 (20.4 to 27.2)    | 16.2 (15.3 to 17.3) | 15.7 (14.9 to 16.6)    | 14.3 (9.9 to 19.6)   | 17.3 (12.0 to 23.9)   | 262.4 (247.0 to 282.6)       | 356.6 (336.4 to 378.5)       |
| Swaziland                  | 4.4 (4.1 to 4.7)             | 5.9 (5.5 to 6.3)             | 0.30 (0.25 to 0.34)   | 0.30 (0.25 to 0.34)    | 0.31 (0.23 to 0.42) | 0.29 (0.23 to 0.36)    | 0.21 (0.14 to 0.28)  | 0.29 (0.20 to 0.40)   | 6.0 (4.2 to 8.2)             | 7.7 (5.9 to 9.7)             |
| Zimbabwe                   | 47.6 (44.2 to 51.0)          | 73.3 (68.2 to 78.6)          | 4.2 (3.6 to 4.8)      | 4.1 (3.5 to 4.7)       | 5.2 (4.2 to 6.3)    | 3.5 (2.9 to 4.1)       | 2.1 (1.5 to 2.9)     | 3.6 (2.5 to 5.0)      | 111.2 (86.8 to 136.6)        | 84.6 (70.6 to 101.8)         |
| Western Sub-Saharan Africa | 951.8 (900.7 to 1005.6)      | 1,779.4 (1,680.6 to 1,886.1) | 70.8 (61.8 to 80.5)   | 96.9 (85.1 to 109.6)   | 72.6 (63.3 to 82.8) | 75.5 (65.6 to 87.7)    | 40.2 (27.5 to 55.9)  | 81.7 (55.9 to 113.7)  | 1,445.2 (1,246.7 to 1,672.1) | 1,685.7 (1,453.9 to 1,978.8) |
| Benin                      | 23.1 (21.6 to 24.7)          | 41.7 (39.0 to 44.6)          | 1.7 (1.5 to 2.0)      | 2.2 (1.9 to 2.6)       | 2.0 (1.5 to 2.5)    | 1.7 (1.3 to 2.2)       | 1.0 (0.7 to 1.4)     | 2.0 (1.3 to 2.7)      | 37.6 (28.4 to 48.3)          | 39.6 (29.4 to 52.8)          |
| Burkina Faso               | 50.1 (46.9 to 53.5)          | 89.0 (83.6 to 94.9)          | 3.4 (2.9 to 3.9)      | 4.6 (4.0 to 5.4)       | 4.0 (3.4 to 4.8)    | 5.5 (4.7 to 6.5)       | 2.2 (1.5 to 3.1)     | 4.2 (2.9 to 5.9)      | 79.6 (65.1 to 96.6)          | 128.9 (107.0 to 153.7)       |
| Cameroon                   | 57.7 (54.4 to 61.4)          | 112.6 (105.3 to 120.0)       | 4.2 (3.6 to 4.9)      | 5.9 (5.1 to 6.8)       | 4.3 (3.2 to 5.7)    | 4.6 (3.4 to 6.0)       | 2.5 (1.7 to 3.4)     | 5.2 (3.5 to 7.3)      | 86.4 (62.6 to 117.9)         | 112.4 (79.2 to 153.1)        |
| Cape Verde                 | 2.8 (2.6 to 3.0)             | 4.1 (3.9 to 4.4)             | 0.16 (0.14 to 0.19)   | 0.19 (0.17 to 0.22)    | 0.25 (0.22 to 0.27) | 0.21 (0.19 to 0.24)    | 0.12 (0.08 to 0.17)  | 0.19 (0.13 to 0.27)   | 3.4 (3.0 to 3.7)             | 3.8 (3.3 to 4.4)             |
| Chad                       | 28.9 (27.2 to 30.7)          | 66.0 (61.7 to 70.5)          | 1.9 (1.6 to 2.2)      | 3.3 (2.9 to 3.8)       | 2.3 (1.8 to 3.0)    | 3.1 (2.4 to 4.0)       | 1.3 (0.9 to 1.8)     | 3.1 (2.1 to 4.3)      | 48.2 (37.0 to 64.3)          | 69.8 (52.5 to 92.3)          |
| Cote d'Ivoire              | 50.4 (47.2 to 53.8)          | 119.6 (111.8 to 127.8)       | 4.1 (3.6 to 4.8)      | 6.8 (5.9 to 7.9)       | 5.1 (4.0 to 6.3)    | 6.7 (5.4 to 8.2)       | 2.1 (1.4 to 3.0)     | 5.5 (3.8 to 7.6)      | 113.7 (88.0 to 143.2)        | 175.5 (139.6 to 217.8)       |
| The Gambia                 | 5.5 (5.2 to 5.9)             | 10.5 (9.9 to 11.2)           | 0.38 (0.32 to 0.44)   | 0.54 (0.46 to 0.62)    | 0.65 (0.52 to 0.80) | 0.71 (0.58 to 0.84)    | 0.24 (0.17 to 0.34)  | 0.50 (0.34 to 0.70)   | 12.4 (9.8 to 15.4)           | 16.7 (13.0 to 20.6)          |
| Ghana                      | 100.2 (94.1 to 106.9)        | 133.5 (124.8 to 142.2)       | 7.1 (6.2 to 8.1)      | 7.7 (6.6 to 8.8)       | 8.8 (7.3 to 10.5)   | 6.7 (5.8 to 7.6)       | 4.5 (3.0 to 6.3)     | 6.3 (4.3 to 8.7)      | 179.5 (146.5 to 218.3)       | 161.0 (135.4 to 188.1)       |
| Guinea                     | 27.0 (25.5 to 28.7)          | 54.4 (51.1 to 58.0)          | 2.2 (1.9 to 2.5)      | 3.2 (2.8 to 3.7)       | 3.6 (3.0 to 4.3)    | 3.8 (3.1 to 4.5)       | 1.2 (0.8 to 1.6)     | 2.5 (1.7 to 3.5)      | 71.1 (57.4 to 87.1)          | 84.8 (69.0 to 102.5)         |
| Guinea-Bissau              | 3.8 (3.6 to 4.0)             | 6.9 (6.4 to 7.3)             | 0.27 (0.23 to 0.31)   | 0.35 (0.30 to 0.41)    | 0.48 (0.38 to 0.60) | 0.48 (0.39 to 0.59)    | 0.17 (0.12 to 0.23)  | 0.33 (0.22 to 0.45)   | 11.3 (8.7 to 14.2)           | 13.1 (10.3 to 16.3)          |
| Liberia                    | 11.7 (11.0 to 12.5)          | 26.4 (24.7 to 28.1)          | 0.79 (0.68 to 0.92)   | 1.3 (1.1 to 1.5)       | 1.1 (0.8 to 1.3)    | 1.1 (0.9 to 1.4)       | 0.52 (0.35 to 0.71)  | 1.3 (0.9 to 1.8)      | 22.8 (17.3 to 28.7)          | 25.9 (20.1 to 32.2)          |
| Mali                       | 31.4 (29.5 to 33.3)          | 72.5 (67.9 to 77.6)          | 2.9 (2.5 to 3.3)      | 4.3 (3.7 to 4.9)       | 4.0 (3.2 to 4.9)    | 3.1 (2.3 to 4.1)       | 1.3 (0.9 to 1.8)     | 3.3 (2.2 to 4.6)      | 86.3 (68.4 to 107.1)         | 64.3 (46.3 to 84.8)          |
| Mauritania                 | 10.7 (10.0 to 11.4)          | 23.1 (21.6 to 24.9)          | 0.73 (0.64 to 0.85)   | 1.1 (0.9 to 1.3)       | 1.1 (0.8 to 1.3)    | 0.87 (0.65 to 1.11)    | 0.46 (0.31 to 0.63)  | 1.1 (0.7 to 1.5)      | 20.4 (16.1 to 26.0)          | 17.4 (12.4 to 22.8)          |
| Niger                      | 34.8 (32.5 to 37.0)          | 68.3 (63.9 to 73.1)          | 2.6 (2.2 to 3.0)      | 3.7 (3.1 to 4.2)       | 2.9 (2.1 to 3.9)    | 2.4 (1.6 to 3.4)       | 1.5 (1.0 to 2.1)     | 3.2 (2.2 to 4.5)      | 62.4 (44.2 to 87.1)          | 58.4 (37.4 to 83.1)          |
| Nigeria                    | 428.9 (403.5 to 455.5)       | 793.3 (745.8 to 842.2)       | 32.1 (28.1 to 36.4)   | 43.5 (38.2 to 48.9)    | 24.2 (16.4 to 32.9) | 26.9 (19.8 to 37.1)    | 17.4 (11.8 to 24.3)  | 35.5 (24.2 to 49.2)   | 448.8 (292.9 to 638.5)       | 534.0 (374.3 to 775.8)       |
| Sao Tome and Principe      | 0.63 (0.59 to 0.67)          | 1.2 (1.1 to 1.3)             | 0.04 (0.03 to 0.05)   | 0.05 (0.05 to 0.06)    | 0.05 (0.04 to 0.06) | 0.05 (0.04 to 0.06)    | 0.03 (0.02 to 0.04)  | 0.06 (0.04 to 0.08)   | 1.0 (0.7 to 1.2)             | 1.1 (0.9 to 1.4)             |
| Senegal                    | 42.0 (39.0 to 44.9)          | 78.1 (72.4 to 84.3)          | 3.1 (2.7 to 3.6)      | 4.2 (3.6 to 4.8)       | 3.8 (3.1 to 4.5)    | 3.4 (2.8 to 4.2)       | 1.8 (1.2 to 2.5)     | 3.7 (2.5 to 5.2)      | 74.0 (60.8 to 90.0)          | 75.8 (60.1 to 93.6)          |
| Sierra Leone               | 21.0 (19.7 to 22.4)          | 43.3 (40.6 to 46.1)          | 1.5 (1.3 to 1.8)      | 2.2 (1.9 to 2.5)       | 2.4 (1.9 to 2.9)    | 2.3 (1.9 to 2.8)       | 0.92 (0.63 to 1.27)  | 2.0 (1.4 to 2.8)      | 50.1 (39.4 to 61.9)          | 55.0 (43.5 to 68.4)          |
| Togo                       | 21.1 (19.8 to 22.5)          | 34.9 (32.6 to 37.2)          | 1.5 (1.2 to 1.7)      | 1.7 (1.5 to 2.0)       | 1.7 (1.3 to 2.2)    | 1.8 (1.4 to 2.3)       | 0.93 (0.63 to 1.30)  | 1.7 (1.1 to 2.3)      | 36.1 (27.6 to 46.8)          | 48.0 (36.3 to 61.0)          |
| Andean Latin America       | 291.9 (272.7 to 312.5)       | 376.7 (352.0 to 403.5)       | 17.7 (15.4 to 20.3)   | 24.6 (21.3 to 28.1)    | 14.3 (12.9 to 15.8) | 18.1 (16.4 to 20.1)    | 15.3 (10.5 to 21.2)  | 19.3 (13.2 to 26.7)   | 216.1 (192.5 to 240.5)       | 334.9 (299.9 to 377.4)       |
| Bolivia                    | 48.6 (45.1 to 52.2)          | 61.7 (57.6 to 66.3)          | 3.2 (2.8 to 3.7)      | 4.2 (3.6 to 4.8)       | 3.8 (3.0 to 4.7)    | 4.2 (3.3 to 5.5)       | 2.4 (1.6 to 3.3)     | 2.9 (1.9 to 4.0)      | 64.9 (49.8 to 81.9)          | 83.8 (63.5 to 109.5)         |
| Ecuador                    | 85.1 (79.3 to 91.3)          | 108.8 (101.3 to 117.2)       | 5.0 (4.3 to 5.8)      | 7.0 (6.1 to 8.0)       | 4.1 (3.6 to 4.6)    | 5.2 (4.6 to 5.9)       | 4.2 (2.9 to 5.8)     | 5.3 (3.7 to 7.3)      | 61.7 (53.6 to 70.5)          | 100.9 (88.1 to 114.9)        |
| Peru                       | 158.2 (146.4 to 170.7)       | 206.1 (190.9 to 221.5)       | 9.5 (8.2 to 10.9)     | 13.4 (11.6 to 15.3)    | 6.5 (5.4 to 7.7)    | 8.6 (7.2 to 10.2)      | 8.8 (6.0 to 12.1)    | 11.1 (7.7 to 15.4)    | 89.5 (73.0 to 108.0)         | 150.2 (121.9 to 181.7)       |
| Tropical Latin America     | 1,284.1 (1,197.9 to 1,375.5) | 2,374.0 (2,234.3 to 2,525.6) | 74.0 (64.5 to 85.0)   | 107.3 (93.8 to 122.1)  | 80.0 (77.3 to 82.6) | 100.7 (96.8 to 103.5)  | 64.7 (44.5 to 88.8)  | 114.9 (78.2 to 160.9) | 1,375.2 (1,326.3 to 1,415.6) | 2,219.0 (2,129.8 to 2,280.7) |
| Brazil                     | 1,255.6 (1,170.8 to 1,345.2) | 2,314.8 (2,179.2 to 2,463.9) | 72.3 (63.0 to 83.0)   | 104.7 (91.5 to 119.1)  | 78.0 (75.4 to 80.5) | 97.8 (93.8 to 100.4)   | 63.2 (43.5 to 86.7)  | 111.9 (76.1 to 156.6) | 1,343.3 (1,296.3 to 1,383.0) | 2,159.9 (2,070.7 to 2,217.6) |
| Paraguay                   | 28.5 (26.3 to 30.8)          | 59.2 (55.4 to 63.6)          | 1.7 (1.5 to 2.0)      | 2.6 (2.3 to 3.0)       | 2.1 (1.7 to 2.5)    | 2.9 (2.3 to 3.5)       | 1.5 (1.1 to 2.1)     | 3.1 (2.1 to 4.2)      | 31.8 (25.1 to 38.9)          | 59.1 (46.9 to 72.6)          |
| Central Latin America      | 1,757.4 (1,644.4 to 1,876.3) | 1,829.8 (1,716.5 to 1,951.7) | 100.0 (87.7 to 113.9) | 120.6 (105.9 to 135.6) | 91.7 (85.2 to 96.5) | 113.4 (107.8 to 118.9) | 89.0 (61.1 to 123.4) | 92.3 (63.6 to 127.3)  | 1,362.7 (1,281.2 to 1,436.5) | 2,217.3 (2,107.9 to 2,332.6) |
| Colombia                   | 373.2 (346.7 to 399.5)       | 390.9 (365.4 to 418.3)       | 23.3 (20.5 to 26.3)   | 26.9 (23.8 to 30.3)    | 18.2 (15.7 to 21.0) | 20.8 (18.3 to 23.6)    | 18.6 (12.7 to 25.7)  | 19.4 (13.3 to 27.0)   | 256.3 (218.2 to 298.6)       | 372.8 (322.7 to 428.1)       |
| Costa Rica                 | 35.3 (33.0 to 37.6)          | 38.2 (35.6 to 40.9)          | 1.8 (1.6 to 2.1)      | 2.3 (2.0 to 2.6)       | 1.5 (1.4 to 1.7)    | 2.3 (2.1 to 2.6)       | 1.7 (1.2 to 2.4)     | 1.9 (1.3 to 2.6)      | 21.2 (19.2 to 23.5)          | 43.8 (39.9 to 47.8)          |
| El Salvador                | 39.4 (36.4 to 42.5)          | 35.9 (33.1 to 38.7)          | 2.5 (2.1 to 2.8)      | 2.6 (2.2 to 3.0)       | 3.1 (2.6 to 3.8)    | 3.3 (2.7 to 3.9)       | 2.2 (1.5 to 3.0)     | 2.0 (1.4 to 2.7)      | 46.6 (37.5 to 57.5)          | 60.8 (49.2 to 73.2)          |

|                                  |                              |                              |                        |                        |                        |                        |                       |                       |                              |                              |
|----------------------------------|------------------------------|------------------------------|------------------------|------------------------|------------------------|------------------------|-----------------------|-----------------------|------------------------------|------------------------------|
| Guatemala                        | 72.3 (67.6 to 77.7)          | 75.1 (69.5 to 80.8)          | 4.4 (3.8 to 5.1)       | 5.2 (4.5 to 5.9)       | 4.0 (3.5 to 4.6)       | 4.6 (4.1 to 5.2)       | 3.8 (2.6 to 5.2)      | 4.0 (2.7 to 5.5)      | 67.7 (57.7 to 78.7)          | 92.5 (81.0 to 105.2)         |
| Honduras                         | 43.3 (40.2 to 46.5)          | 50.4 (47.0 to 54.1)          | 2.9 (2.5 to 3.3)       | 3.4 (2.9 to 3.9)       | 4.5 (3.3 to 5.6)       | 3.9 (3.1 to 4.7)       | 2.2 (1.5 to 3.1)      | 2.6 (1.8 to 3.6)      | 85.8 (62.9 to 108.3)         | 81.5 (63.3 to 101.7)         |
| Mexico                           | 933.5 (873.6 to 995.6)       | 945.8 (884.1 to 1011.9)      | 49.3 (42.7 to 56.5)    | 58.9 (51.1 to 67.1)    | 44.9 (42.6 to 46.4)    | 56.4 (54.2 to 58.6)    | 47.3 (32.6 to 65.3)   | 48.1 (33.0 to 66.2)   | 646.3 (616.0 to 667.0)       | 1,100.0 (1,060.6 to 1,139.4) |
| Nicaragua                        | 32.9 (30.7 to 35.2)          | 35.8 (33.4 to 38.3)          | 1.9 (1.6 to 2.1)       | 2.2 (1.9 to 2.5)       | 1.9 (1.7 to 2.1)       | 1.7 (1.5 to 1.9)       | 1.7 (1.1 to 2.3)      | 1.9 (1.3 to 2.6)      | 27.1 (23.1 to 31.5)          | 32.2 (27.7 to 37.6)          |
| Panama                           | 24.8 (23.0 to 26.6)          | 29.2 (27.2 to 31.4)          | 1.3 (1.1 to 1.5)       | 1.8 (1.5 to 2.0)       | 1.1 (1.0 to 1.2)       | 1.4 (1.3 to 1.5)       | 1.3 (0.9 to 1.8)      | 1.5 (1.0 to 2.1)      | 14.2 (12.8 to 15.5)          | 25.0 (22.9 to 27.2)          |
| Venezuela                        | 202.9 (188.5 to 217.9)       | 228.4 (213.2 to 244.4)       | 12.7 (11.2 to 14.4)    | 17.4 (15.4 to 19.4)    | 12.4 (10.1 to 14.8)    | 18.9 (15.8 to 22.4)    | 10.2 (7.0 to 14.1)    | 11.0 (7.6 to 15.2)    | 197.6 (159.2 to 237.4)       | 408.7 (334.5 to 489.6)       |
| Southern Latin America           | 349.9 (319.6 to 381.5)       | 660.7 (616.9 to 707.2)       | 41.2 (36.5 to 46.3)    | 73.7 (65.6 to 81.9)    | 33.2 (29.9 to 36.9)    | 37.2 (33.7 to 41.4)    | 14.1 (9.7 to 19.6)    | 18.7 (12.9 to 25.6)   | 412.5 (367.7 to 462.9)       | 688.2 (620.1 to 767.7)       |
| Argentina                        | 224.1 (203.2 to 246.0)       | 411.0 (381.9 to 440.7)       | 29.3 (26.1 to 32.8)    | 48.0 (42.7 to 53.5)    | 25.8 (22.7 to 29.2)    | 28.1 (24.8 to 32.0)    | 9.0 (6.1 to 12.6)     | 11.6 (8.0 to 15.8)    | 320.8 (279.0 to 370.0)       | 519.3 (452.0 to 596.0)       |
| Chile                            | 102.4 (94.0 to 111.2)        | 208.8 (195.0 to 223.8)       | 9.5 (8.3 to 11.0)      | 21.2 (18.5 to 24.3)    | 5.4 (4.7 to 6.1)       | 6.9 (6.1 to 7.9)       | 4.0 (2.8 to 5.5)      | 6.0 (4.1 to 8.1)      | 68.7 (58.5 to 78.9)          | 132.0 (114.8 to 153.3)       |
| Uruguay                          | 23.3 (20.9 to 25.8)          | 40.9 (37.9 to 44.0)          | 2.4 (2.1 to 2.8)       | 4.5 (3.9 to 5.3)       | 2.0 (1.8 to 2.3)       | 2.1 (1.9 to 2.4)       | 1.0 (0.7 to 1.4)      | 1.2 (0.8 to 1.6)      | 22.9 (19.6 to 26.4)          | 36.9 (32.5 to 42.2)          |
| Caribbean                        | 390.3 (366.3 to 416.0)       | 446.1 (418.7 to 474.4)       | 27.4 (24.1 to 31.2)    | 33.7 (29.6 to 38.0)    | 27.3 (25.1 to 29.7)    | 31.7 (29.4 to 34.2)    | 18.9 (12.9 to 26.1)   | 21.2 (14.7 to 29.4)   | 446.4 (402.9 to 496.0)       | 615.7 (566.0 to 670.0)       |
| Antigua and Barbuda              | 0.68 (0.64 to 0.72)          | 0.77 (0.72 to 0.82)          | 0.04 (0.04 to 0.05)    | 0.05 (0.05 to 0.06)    | 0.04 (0.03 to 0.04)    | 0.04 (0.03 to 0.04)    | 0.03 (0.02 to 0.04)   | 0.04 (0.02 to 0.05)   | 0.55 (0.50 to 0.60)          | 0.68 (0.62 to 0.76)          |
| The Bahamas                      | 2.9 (2.7 to 3.1)             | 3.2 (3.0 to 3.4)             | 0.18 (0.15 to 0.21)    | 0.21 (0.18 to 0.25)    | 0.13 (0.11 to 0.15)    | 0.17 (0.16 to 0.19)    | 0.13 (0.09 to 0.18)   | 0.14 (0.09 to 0.19)   | 2.3 (2.0 to 2.6)             | 4.2 (3.7 to 4.7)             |
| Barbados                         | 3.6 (3.4 to 3.9)             | 3.8 (3.6 to 4.1)             | 0.22 (0.19 to 0.26)    | 0.26 (0.22 to 0.30)    | 0.16 (0.14 to 0.18)    | 0.15 (0.14 to 0.17)    | 0.17 (0.12 to 0.23)   | 0.18 (0.12 to 0.24)   | 2.1 (1.8 to 2.4)             | 2.7 (2.4 to 3.0)             |
| Belize                           | 2.0 (1.9 to 2.1)             | 2.7 (2.5 to 2.9)             | 0.12 (0.10 to 0.14)    | 0.18 (0.16 to 0.21)    | 0.07 (0.07 to 0.08)    | 0.12 (0.11 to 0.12)    | 0.09 (0.06 to 0.13)   | 0.12 (0.08 to 0.17)   | 1.3 (1.2 to 1.4)             | 2.5 (2.3 to 2.7)             |
| Bermuda                          | 1.0 (0.9 to 1.1)             | 1.0 (0.9 to 1.0)             | 0.05 (0.05 to 0.06)    | 0.06 (0.05 to 0.07)    | 0.04 (0.03 to 0.04)    | 0.06 (0.06 to 0.07)    | 0.05 (0.03 to 0.07)   | 0.05 (0.03 to 0.07)   | 0.38 (0.33 to 0.43)          | 1.0 (1.0 to 1.1)             |
| Cuba                             | 126.0 (116.1 to 135.9)       | 145.3 (134.0 to 156.5)       | 9.9 (8.7 to 11.2)      | 12.1 (10.7 to 13.6)    | 9.8 (8.6 to 11.1)      | 11.5 (10.1 to 13.1)    | 6.5 (4.4 to 8.9)      | 7.3 (5.0 to 10.0)     | 130.0 (112.8 to 149.3)       | 195.2 (168.8 to 225.2)       |
| Dominica                         | 0.65 (0.61 to 0.69)          | 0.79 (0.74 to 0.84)          | 0.04 (0.04 to 0.05)    | 0.06 (0.05 to 0.06)    | 0.04 (0.04 to 0.05)    | 0.04 (0.03 to 0.04)    | 0.03 (0.02 to 0.04)   | 0.03 (0.02 to 0.05)   | 0.53 (0.47 to 0.58)          | 0.66 (0.60 to 0.73)          |
| Dominican Republic               | 63.1 (58.7 to 67.8)          | 76.8 (71.4 to 82.4)          | 4.8 (4.2 to 5.5)       | 6.5 (5.7 to 7.3)       | 5.8 (4.9 to 6.7)       | 7.8 (6.6 to 9.1)       | 3.1 (2.2 to 4.3)      | 3.8 (2.6 to 5.2)      | 100.7 (83.6 to 118.0)        | 164.1 (136.6 to 194.9)       |
| Grenada                          | 1.2 (1.1 to 1.2)             | 1.5 (1.4 to 1.6)             | 0.08 (0.07 to 0.09)    | 0.10 (0.09 to 0.12)    | 0.09 (0.08 to 0.10)    | 0.08 (0.08 to 0.09)    | 0.05 (0.04 to 0.07)   | 0.07 (0.05 to 0.10)   | 1.2 (1.1 to 1.3)             | 1.6 (1.5 to 1.7)             |
| Guyana                           | 5.0 (4.7 to 5.4)             | 5.9 (5.6 to 6.3)             | 0.32 (0.27 to 0.37)    | 0.40 (0.35 to 0.47)    | 0.39 (0.34 to 0.45)    | 0.52 (0.45 to 0.59)    | 0.23 (0.15 to 0.31)   | 0.27 (0.19 to 0.37)   | 7.7 (6.6 to 8.9)             | 12.6 (10.8 to 14.5)          |
| Haiti                            | 62.8 (58.9 to 67.3)          | 72.1 (67.9 to 77.0)          | 4.3 (3.8 to 5.0)       | 5.0 (4.4 to 5.7)       | 5.4 (4.0 to 7.1)       | 4.6 (3.4 to 5.7)       | 2.7 (1.9 to 3.8)      | 3.3 (2.2 to 4.5)      | 121.5 (88.9 to 160.4)        | 105.2 (76.6 to 133.3)        |
| Jamaica                          | 23.1 (21.7 to 24.6)          | 27.3 (25.6 to 29.1)          | 1.5 (1.3 to 1.7)       | 1.9 (1.6 to 2.2)       | 1.0 (0.8 to 1.2)       | 1.2 (1.0 to 1.4)       | 1.0 (0.7 to 1.4)      | 1.2 (0.8 to 1.7)      | 13.6 (11.1 to 16.6)          | 21.7 (17.5 to 26.3)          |
| Puerto Rico                      | 58.4 (54.3 to 62.8)          | 58.7 (54.6 to 62.8)          | 3.3 (2.9 to 3.9)       | 3.7 (3.2 to 4.3)       | 2.0 (1.9 to 2.2)       | 2.5 (2.3 to 2.7)       | 2.8 (1.9 to 3.8)      | 2.7 (1.8 to 3.7)      | 25.9 (23.4 to 28.3)          | 41.1 (37.7 to 44.6)          |
| Saint Lucia                      | 1.5 (1.4 to 1.6)             | 1.8 (1.7 to 2.0)             | 0.10 (0.08 to 0.11)    | 0.13 (0.11 to 0.15)    | 0.06 (0.06 to 0.07)    | 0.08 (0.07 to 0.08)    | 0.07 (0.05 to 0.09)   | 0.08 (0.06 to 0.11)   | 0.88 (0.78 to 0.99)          | 1.5 (1.3 to 1.6)             |
| Saint Vincent and the Grenadines | 1.0 (0.9 to 1.0)             | 1.3 (1.2 to 1.4)             | 0.06 (0.05 to 0.07)    | 0.09 (0.08 to 0.11)    | 0.07 (0.07 to 0.08)    | 0.08 (0.08 to 0.09)    | 0.04 (0.03 to 0.06)   | 0.06 (0.04 to 0.08)   | 1.0 (0.9 to 1.1)             | 1.6 (1.5 to 1.8)             |
| Suriname                         | 5.2 (4.9 to 5.6)             | 5.9 (5.5 to 6.3)             | 0.32 (0.27 to 0.37)    | 0.39 (0.33 to 0.45)    | 0.23 (0.20 to 0.26)    | 0.35 (0.31 to 0.40)    | 0.24 (0.16 to 0.33)   | 0.28 (0.19 to 0.39)   | 4.1 (3.5 to 4.6)             | 8.0 (6.9 to 9.3)             |
| Trinidad and Tobago              | 16.8 (15.7 to 18.0)          | 19.8 (18.6 to 21.2)          | 1.0 (0.9 to 1.2)       | 1.3 (1.1 to 1.5)       | 0.91 (0.71 to 1.14)    | 1.2 (1.0 to 1.5)       | 0.80 (0.55 to 1.10)   | 0.91 (0.62 to 1.28)   | 15.1 (11.6 to 19.3)          | 26.0 (20.4 to 32.3)          |
| Virgin Islands, U.S.             | 1.3 (1.2 to 1.4)             | 1.3 (1.2 to 1.4)             | 0.08 (0.07 to 0.09)    | 0.09 (0.08 to 0.11)    | 0.11 (0.09 to 0.13)    | 0.16 (0.13 to 0.19)    | 0.06 (0.04 to 0.09)   | 0.06 (0.04 to 0.09)   | 1.6 (1.4 to 1.9)             | 3.3 (2.5 to 3.8)             |
| Central Europe                   | 2,535.8 (2,359.0 to 2,713.0) | 2,694.3 (2,530.7 to 2,869.2) | 204.6 (187.8 to 225.3) | 217.9 (198.8 to 238.6) | 179.8 (174.1 to 186.6) | 170.1 (165.3 to 175.5) | 120.8 (83.7 to 164.1) | 110.6 (76.6 to 151.1) | 2,004.8 (1,938.0 to 2,083.8) | 2,898.8 (2,810.5 to 3,000.7) |
| Albania                          | 36.0 (33.1 to 38.9)          | 47.5 (44.2 to 51.1)          | 2.2 (1.9 to 2.6)       | 3.8 (3.3 to 4.4)       | 2.2 (1.7 to 2.8)       | 3.7 (2.9 to 4.5)       | 1.9 (1.3 to 2.6)      | 2.1 (1.4 to 2.9)      | 29.7 (22.6 to 38.7)          | 62.8 (49.5 to 77.9)          |
| Bosnia and Herzegovina           | 62.6 (57.6 to 67.9)          | 78.0 (72.4 to 84.2)          | 4.5 (3.9 to 5.3)       | 5.7 (4.9 to 6.5)       | 4.6 (4.2 to 5.0)       | 4.4 (4.0 to 4.7)       | 3.1 (2.2 to 4.3)      | 3.4 (2.4 to 4.7)      | 59.1 (53.9 to 64.9)          | 77.4 (70.0 to 84.4)          |
| Bulgaria                         | 181.3 (167.5 to 195.2)       | 194.1 (180.9 to 207.5)       | 16.3 (14.7 to 18.3)    | 18.2 (16.5 to 19.9)    | 16.5 (15.3 to 17.8)    | 17.3 (16.2 to 18.5)    | 8.6 (5.9 to 11.7)     | 7.8 (5.4 to 10.7)     | 203.8 (188.3 to 220.4)       | 308.3 (285.7 to 331.4)       |
| Croatia                          | 100.4 (93.3 to 107.6)        | 112.0 (105.6 to 118.6)       | 7.0 (6.2 to 8.0)       | 7.4 (6.6 to 8.3)       | 7.1 (6.6 to 7.8)       | 5.9 (5.5 to 6.3)       | 4.6 (3.2 to 6.4)      | 4.5 (3.1 to 6.2)      | 73.8 (67.8 to 80.6)          | 94.4 (87.2 to 101.2)         |
| Czech Republic                   | 250.2 (228.6 to 272.5)       | 279.3 (257.3 to 301.1)       | 20.3 (18.2 to 22.7)    | 23.8 (21.4 to 26.4)    | 16.3 (15.2 to 17.5)    | 15.4 (14.4 to 16.5)    | 13.2 (9.2 to 18.0)    | 11.8 (8.2 to 16.0)    | 166.0 (153.3 to 180.4)       | 243.4 (225.7 to 262.0)       |
| Hungary                          | 262.7 (241.9 to 284.5)       | 263.8 (247.2 to 283.5)       | 21.2 (19.0 to 23.6)    | 20.4 (18.4 to 22.6)    | 18.5 (17.2 to 19.9)    | 15.7 (14.7 to 16.8)    | 12.0 (8.3 to 16.3)    | 10.6 (7.3 to 14.4)    | 207.7 (193.1 to 224.7)       | 270.8 (251.7 to 291.8)       |
| Macedonia                        | 33.4 (30.9 to 35.7)          | 42.2 (39.3 to 45.2)          | 1.8 (1.6 to 2.1)       | 3.0 (2.6 to 3.4)       | 1.5 (1.4 to 1.6)       | 2.6 (2.4 to 2.8)       | 1.5 (1.1 to 2.1)      | 1.7 (1.2 to 2.4)      | 23.5 (21.3 to 25.9)          | 48.7 (44.2 to 53.5)          |

|                              |                              |                              |                        |                        |                        |                        |                        |                        |                              |                               |
|------------------------------|------------------------------|------------------------------|------------------------|------------------------|------------------------|------------------------|------------------------|------------------------|------------------------------|-------------------------------|
| Montenegro                   | 11.3 (10.3 to 12.2)          | 13.3 (12.3 to 14.4)          | 0.60 (0.50 to 0.71)    | 0.86 (0.74 to 1.00)    | 0.62 (0.55 to 0.69)    | 0.83 (0.74 to 0.93)    | 0.59 (0.41 to 0.80)    | 0.61 (0.43 to 0.83)    | 8.5 (7.6 to 9.4)             | 15.2 (13.5 to 17.2)           |
| Poland                       | 798.9 (735.8 to 863.8)       | 823.0 (768.7 to 878.5)       | 67.9 (62.3 to 74.1)    | 70.3 (64.3 to 77.0)    | 49.6 (46.3 to 53.1)    | 48.1 (45.0 to 51.2)    | 39.1 (27.2 to 52.5)    | 34.0 (23.7 to 46.3)    | 516.6 (477.4 to 556.6)       | 831.1 (775.1 to 892.8)        |
| Romania                      | 462.1 (424.0 to 501.3)       | 462.4 (428.8 to 504.8)       | 33.7 (31.0 to 37.0)    | 34.5 (31.5 to 37.7)    | 34.3 (32.0 to 36.8)    | 33.2 (31.1 to 35.6)    | 20.1 (13.7 to 27.9)    | 18.7 (12.7 to 25.8)    | 403.4 (374.4 to 433.8)       | 561.5 (522.9 to 603.4)        |
| Serbia                       | 185.9 (173.5 to 199.3)       | 222.6 (209.6 to 236.3)       | 18.4 (16.7 to 20.2)    | 18.4 (16.6 to 20.6)    | 17.7 (16.3 to 19.4)    | 13.6 (12.6 to 14.8)    | 8.1 (5.6 to 11.1)      | 8.3 (5.7 to 11.4)      | 195.4 (179.9 to 213.3)       | 226.7 (207.6 to 248.8)        |
| Slovakia                     | 104.6 (96.7 to 113.2)        | 108.9 (100.9 to 117.2)       | 8.4 (7.5 to 9.3)       | 8.3 (7.5 to 9.3)       | 9.2 (8.5 to 9.8)       | 7.7 (7.2 to 8.4)       | 5.9 (4.1 to 8.0)       | 5.2 (3.6 to 7.1)       | 101.6 (93.3 to 110.4)        | 133.5 (122.4 to 148.5)        |
| Slovenia                     | 46.4 (43.3 to 49.6)          | 47.3 (44.2 to 50.5)          | 2.4 (2.1 to 2.8)       | 3.1 (2.7 to 3.6)       | 1.8 (1.6 to 2.1)       | 1.6 (1.5 to 1.8)       | 2.1 (1.5 to 2.9)       | 1.9 (1.3 to 2.6)       | 15.6 (13.9 to 18.5)          | 24.9 (22.7 to 27.5)           |
| Eastern Europe               | 5,127.1 (4,746.5 to 5,507.0) | 3,988.9 (3,725.1 to 4,295.2) | 445.6 (392.7 to 509.8) | 447.6 (395.9 to 504.6) | 524.6 (513.5 to 539.7) | 444.5 (434.4 to 458.3) | 232.3 (161.5 to 316.9) | 135.0 (93.5 to 185.2)  | 6,689.1 (6,538.3 to 6,893.6) | 8,980.9 (8,750.0 to 9,313.3)  |
| Belarus                      | 227.8 (209.7 to 247.9)       | 214.3 (200.7 to 227.9)       | 30.4 (27.8 to 33.2)    | 28.9 (26.3 to 31.7)    | 28.7 (26.9 to 30.6)    | 23.9 (22.5 to 25.4)    | 9.9 (6.8 to 13.5)      | 7.0 (4.9 to 9.5)       | 347.5 (323.8 to 373.4)       | 458.6 (425.8 to 491.9)        |
| Estonia                      | 34.4 (31.8 to 37.3)          | 33.1 (31.0 to 35.3)          | 2.9 (2.5 to 3.5)       | 2.9 (2.5 to 3.4)       | 2.5 (2.1 to 3.5)       | 1.8 (1.5 to 2.3)       | 1.4 (1.0 to 1.9)       | 1.1 (0.7 to 1.4)       | 24.4 (19.8 to 33.9)          | 28.9 (24.0 to 37.3)           |
| Latvia                       | 54.1 (49.9 to 59.3)          | 47.1 (44.2 to 50.5)          | 4.7 (4.1 to 5.3)       | 4.3 (3.8 to 4.9)       | 5.0 (4.4 to 5.7)       | 4.0 (3.5 to 4.5)       | 2.2 (1.5 to 3.0)       | 1.5 (1.0 to 2.1)       | 54.2 (47.0 to 63.3)          | 70.4 (61.1 to 81.4)           |
| Lithuania                    | 81.9 (74.2 to 90.7)          | 71.7 (67.0 to 77.2)          | 8.8 (7.9 to 9.9)       | 7.7 (6.8 to 8.6)       | 8.7 (8.2 to 9.3)       | 6.6 (6.2 to 7.2)       | 3.8 (2.7 to 5.2)       | 2.5 (1.8 to 3.5)       | 88.3 (81.8 to 95.2)          | 112.0 (103.7 to 121.5)        |
| Moldova                      | 70.9 (64.8 to 77.7)          | 71.7 (66.6 to 77.4)          | 7.4 (6.6 to 8.4)       | 8.4 (7.4 to 9.4)       | 8.1 (7.7 to 8.8)       | 7.1 (6.8 to 7.5)       | 3.0 (2.1 to 4.2)       | 2.5 (1.7 to 3.4)       | 108.7 (102.9 to 117.7)       | 135.2 (129.1 to 143.9)        |
| Russian Federation           | 3,471.9 (3,219.6 to 3,733.0) | 2,665.2 (2,474.5 to 2,878.4) | 281.9 (245.5 to 323.7) | 288.8 (252.8 to 327.3) | 305.1 (299.3 to 312.4) | 257.8 (252.9 to 268.6) | 154.3 (107.1 to 211.3) | 88.9 (61.3 to 122.7)   | 3,938.5 (3,859.6 to 4,043.3) | 5,421.2 (5,312.4 to 5,723.9)  |
| Ukraine                      | 1,186.0 (1,079.9 to 1,293.4) | 885.8 (820.4 to 960.7)       | 109.5 (94.7 to 127.7)  | 106.5 (93.3 to 121.1)  | 166.3 (157.0 to 176.8) | 143.3 (136.0 to 150.9) | 57.7 (40.1 to 78.9)    | 31.5 (22.0 to 42.9)    | 2,127.4 (1,993.5 to 2,271.3) | 2,754.7 (2,592.1 to 2,918.7)  |
| North Africa and Middle East | 4,497.1 (4,225.6 to 4,818.7) | 6,066.7 (5,721.5 to 6,470.4) | 449.2 (404.1 to 498.4) | 679.0 (618.8 to 740.2) | 277.9 (256.3 to 297.3) | 431.9 (407.1 to 455.8) | 165.0 (114.9 to 224.4) | 222.0 (154.3 to 305.5) | 5,446.7 (4,957.2 to 5,860.1) | 9,757.7 (9,127.7 to 10,369.4) |
| Afghanistan                  | 160.3 (146.6 to 174.9)       | 205.9 (189.1 to 224.1)       | 17.6 (15.8 to 19.7)    | 22.3 (19.9 to 24.9)    | 16.8 (13.6 to 20.5)    | 16.9 (14.1 to 20.0)    | 5.0 (3.5 to 6.8)       | 6.9 (4.8 to 9.4)       | 465.1 (363.1 to 598.5)       | 459.2 (364.8 to 569.2)        |
| Algeria                      | 336.4 (315.2 to 362.9)       | 448.5 (419.1 to 480.5)       | 37.9 (33.9 to 42.2)    | 50.0 (44.8 to 55.2)    | 22.3 (19.7 to 24.8)    | 26.9 (23.8 to 30.6)    | 11.9 (8.3 to 16.3)     | 16.5 (11.3 to 22.8)    | 378.2 (330.4 to 425.0)       | 512.0 (435.2 to 591.6)        |
| Bahrain                      | 8.2 (7.7 to 8.8)             | 19.5 (18.2 to 20.9)          | 0.78 (0.67 to 0.91)    | 2.1 (1.7 to 2.4)       | 0.21 (0.18 to 0.23)    | 0.45 (0.40 to 0.51)    | 0.30 (0.21 to 0.42)    | 0.76 (0.53 to 1.06)    | 4.1 (3.6 to 4.6)             | 12.5 (10.9 to 14.3)           |
| Egypt                        | 653.0 (608.1 to 712.9)       | 1,038.3 (0,978.3 to 1,114.6) | 71.9 (64.8 to 79.5)    | 147.2 (137.6 to 156.8) | 50.7 (42.8 to 59.5)    | 108.1 (93.8 to 124.7)  | 24.1 (16.6 to 32.9)    | 34.5 (23.9 to 47.6)    | 1,180.5 (0,982.6 to 1,401.7) | 2,727.7 (2,349.6 to 3,176.9)  |
| Iran                         | 632.4 (586.9 to 682.3)       | 681.8 (634.3 to 736.1)       | 50.2 (43.3 to 57.0)    | 60.3 (52.6 to 68.4)    | 40.6 (39.4 to 43.4)    | 54.9 (53.5 to 58.5)    | 26.5 (18.4 to 36.1)    | 30.1 (20.8 to 40.9)    | 628.0 (608.9 to 671.0)       | 1,082.1 (1,050.3 to 1,153.5)  |
| Iraq                         | 335.3 (306.5 to 367.4)       | 451.4 (413.6 to 493.4)       | 28.1 (24.7 to 32.0)    | 38.7 (33.9 to 43.7)    | 10.4 (9.5 to 11.3)     | 14.7 (13.4 to 15.9)    | 11.3 (7.9 to 15.5)     | 15.7 (10.9 to 21.7)    | 196.0 (177.9 to 215.9)       | 332.2 (302.4 to 364.1)        |
| Jordan                       | 67.6 (63.2 to 72.5)          | 100.8 (94.9 to 108.2)        | 6.3 (5.4 to 7.3)       | 10.1 (8.6 to 11.6)     | 1.5 (1.3 to 1.8)       | 3.2 (2.8 to 3.8)       | 2.2 (1.5 to 3.1)       | 3.5 (2.4 to 4.9)       | 27.4 (22.5 to 33.4)          | 78.1 (66.9 to 91.4)           |
| Kuwait                       | 24.8 (23.3 to 26.3)          | 49.1 (46.0 to 52.2)          | 2.1 (1.8 to 2.5)       | 4.6 (4.0 to 5.3)       | 0.33 (0.30 to 0.37)    | 1.7 (1.5 to 1.8)       | 0.85 (0.59 to 1.17)    | 1.8 (1.2 to 2.5)       | 6.7 (5.9 to 7.6)             | 47.5 (43.3 to 51.7)           |
| Lebanon                      | 71.6 (66.9 to 76.5)          | 77.5 (72.3 to 82.8)          | 7.0 (6.0 to 7.8)       | 8.3 (7.3 to 9.3)       | 4.1 (3.6 to 4.6)       | 6.1 (5.7 to 6.6)       | 2.5 (1.8 to 3.5)       | 2.9 (2.0 to 3.9)       | 57.9 (50.4 to 66.2)          | 135.2 (124.7 to 147.0)        |
| Libya                        | 52.1 (48.6 to 56.0)          | 72.6 (68.1 to 77.3)          | 5.3 (4.7 to 6.1)       | 8.0 (7.0 to 9.1)       | 3.8 (3.0 to 4.5)       | 5.4 (4.4 to 6.4)       | 2.0 (1.4 to 2.7)       | 2.7 (1.9 to 3.7)       | 81.5 (64.1 to 98.4)          | 130.6 (104.1 to 158.1)        |
| Morocco                      | 395.3 (360.9 to 443.9)       | 540.1 (502.0 to 597.7)       | 46.9 (42.8 to 51.2)    | 58.1 (52.8 to 63.8)    | 36.4 (29.0 to 44.3)    | 39.9 (32.4 to 48.9)    | 14.0 (9.8 to 19.1)     | 20.5 (14.2 to 28.1)    | 700.0 (541.0 to 874.8)       | 828.4 (656.7 to 1039.0)       |
| Palestine                    | 28.1 (26.2 to 30.3)          | 35.4 (33.2 to 38.2)          | 3.0 (2.6 to 3.4)       | 3.9 (3.4 to 4.5)       | 1.5 (1.4 to 1.6)       | 1.6 (1.5 to 1.8)       | 1.1 (0.8 to 1.5)       | 1.4 (0.9 to 1.8)       | 26.0 (23.5 to 28.7)          | 39.7 (36.2 to 43.9)           |
| Oman                         | 19.1 (17.9 to 20.5)          | 43.4 (40.6 to 46.4)          | 1.7 (1.5 to 2.0)       | 4.5 (3.8 to 5.2)       | 0.94 (0.77 to 1.07)    | 1.9 (1.5 to 2.3)       | 0.77 (0.54 to 1.05)    | 1.8 (1.3 to 2.5)       | 18.5 (14.8 to 21.9)          | 52.0 (39.9 to 65.6)           |
| Qatar                        | 6.1 (5.7 to 6.5)             | 30.0 (27.5 to 32.5)          | 0.71 (0.60 to 0.83)    | 4.3 (3.7 to 5.0)       | 0.11 (0.09 to 0.14)    | 0.53 (0.42 to 0.64)    | 0.21 (0.14 to 0.29)    | 1.0 (0.7 to 1.4)       | 2.3 (1.8 to 2.8)             | 15.2 (12.0 to 18.8)           |
| Saudi Arabia                 | 169.0 (158.6 to 180.1)       | 350.8 (328.3 to 374.5)       | 15.5 (13.4 to 18.0)    | 34.7 (30.3 to 39.2)    | 6.5 (5.8 to 7.5)       | 14.5 (12.5 to 16.9)    | 6.8 (4.7 to 9.4)       | 13.9 (9.6 to 19.4)     | 153.3 (130.3 to 184.1)       | 392.0 (319.9 to 476.2)        |
| Sudan                        | 173.7 (161.3 to 190.4)       | 267.2 (249.3 to 285.9)       | 20.9 (18.6 to 23.2)    | 34.5 (31.3 to 38.1)    | 16.1 (12.0 to 20.5)    | 25.6 (19.2 to 32.8)    | 6.2 (4.3 to 8.5)       | 9.9 (6.9 to 13.5)      | 360.2 (256.8 to 473.4)       | 587.1 (427.4 to 768.3)        |
| Syria                        | 135.6 (125.0 to 147.6)       | 200.3 (185.9 to 217.7)       | 14.9 (13.2 to 16.8)    | 25.9 (23.3 to 28.5)    | 10.8 (9.3 to 12.1)     | 20.4 (16.7 to 24.9)    | 6.0 (4.2 to 8.1)       | 7.9 (5.6 to 10.9)      | 226.3 (186.3 to 267.7)       | 456.6 (366.7 to 568.5)        |
| Tunisia                      | 129.9 (121.1 to 140.0)       | 161.9 (150.8 to 174.3)       | 14.2 (12.6 to 16.0)    | 19.8 (17.9 to 22.0)    | 8.8 (6.7 to 11.1)      | 13.3 (10.5 to 16.4)    | 4.6 (3.2 to 6.3)       | 5.8 (4.0 to 7.8)       | 124.5 (93.0 to 161.3)        | 231.1 (178.7 to 292.4)        |
| Turkey                       | 939.3 (883.9 to 1001.3)      | 1,006.8 (0,947.1 to 1,075.9) | 84.8 (75.5 to 95.2)    | 104.9 (94.3 to 115.5)  | 31.3 (27.9 to 35.0)    | 53.2 (47.2 to 58.8)    | 33.1 (23.1 to 45.2)    | 34.2 (23.4 to 46.8)    | 463.2 (409.0 to 524.5)       | 1,046.7 (0,926.0 to 1,169.3)  |
| United Arab Emirates         | 21.4 (20.0 to 22.9)          | 103.8 (96.7 to 111.4)        | 2.3 (1.9 to 2.7)       | 12.9 (10.7 to 15.3)    | 0.58 (0.46 to 0.74)    | 3.7 (2.7 to 4.8)       | 0.75 (0.51 to 1.06)    | 3.7 (2.6 to 5.3)       | 13.8 (10.5 to 17.6)          | 123.9 (92.6 to 161.7)         |
| Yemen                        | 133.8 (124.7 to 145.6)       | 175.8 (165.1 to 187.9)       | 16.4 (14.6 to 18.3)    | 23.3 (21.1 to 25.9)    | 13.9 (11.1 to 17.7)    | 18.5 (14.7 to 23.0)    | 4.7 (3.3 to 6.3)       | 6.3 (4.4 to 8.6)       | 328.0 (251.4 to 428.9)       | 458.7 (354.3 to 592.7)        |
| Central Asia                 | 723.0 (671.6 to 776.3)       | 808.4 (756.4 to 861.0)       | 68.0 (62.4 to 73.9)    | 94.8 (87.5 to 102.3)   | 95.3 (90.1 to 100.8)   | 114.4 (108.6 to 120.7) | 38.6 (26.7 to 52.9)    | 37.2 (25.6 to 51.2)    | 1,523.0 (1,426.9 to 1,625.6) | 2,460.1 (2,320.9 to 2,609.9)  |



|                            |                                 |                                 |                        |                         |                        |                              |                        |                        |                                 |                                 |
|----------------------------|---------------------------------|---------------------------------|------------------------|-------------------------|------------------------|------------------------------|------------------------|------------------------|---------------------------------|---------------------------------|
| Armenia                    | 44.6 (40.6 to 48.7)             | 45.9 (42.3 to 49.8)             | 3.0 (2.6 to 3.4)       | 3.2 (2.8 to 3.6)        | 4.6 (4.4 to 4.9)       | 4.8 (4.6 to 5.0)             | 2.4 (1.7 to 3.3)       | 2.3 (1.6 to 3.1)       | 57.5 (54.5 to 60.9)             | 91.1 (87.1 to 95.2)             |
| Azerbaijan                 | 91.4 (84.1 to 99.7)             | 110.5 (103.1 to 117.7)          | 6.7 (6.0 to 7.5)       | 13.1 (12.0 to 14.3)     | 10.6 (9.7 to 11.6)     | 16.7 (15.2 to 18.2)          | 5.0 (3.5 to 6.9)       | 5.0 (3.5 to 6.8)       | 177.2 (161.1 to 195.8)          | 350.6 (315.9 to 387.1)          |
| Georgia                    | 68.3 (62.2 to 74.6)             | 66.1 (60.9 to 72.0)             | 5.3 (4.7 to 6.0)       | 5.2 (4.6 to 5.9)        | 7.7 (7.2 to 8.5)       | 7.3 (6.9 to 7.8)             | 3.7 (2.5 to 5.0)       | 3.1 (2.1 to 4.1)       | 92.5 (87.0 to 100.4)            | 139.8 (132.4 to 148.5)          |
| Kazakhstan                 | 170.8 (157.8 to 185.5)          | 167.8 (156.5 to 180.4)          | 15.5 (14.0 to 17.2)    | 16.2 (14.6 to 17.8)     | 19.3 (18.1 to 20.6)    | 19.2 (17.9 to 21.0)          | 8.8 (6.1 to 12.2)      | 7.3 (5.1 to 10.1)      | 279.4 (259.5 to 299.0)          | 418.6 (382.0 to 476.0)          |
| Kyrgyzstan                 | 35.4 (32.6 to 38.5)             | 37.4 (34.8 to 40.3)             | 2.7 (2.4 to 3.1)       | 3.4 (3.0 to 3.8)        | 5.3 (5.1 to 5.5)       | 5.4 (5.2 to 5.7)             | 2.0 (1.4 to 2.8)       | 1.8 (1.3 to 2.6)       | 77.3 (73.6 to 81.3)             | 111.6 (105.5 to 119.8)          |
| Mongolia                   | 21.8 (20.1 to 23.6)             | 25.1 (23.3 to 27.1)             | 0.89 (0.77 to 1.03)    | 1.5 (1.3 to 1.8)        | 1.6 (1.4 to 1.8)       | 2.3 (2.1 to 2.6)             | 1.2 (0.8 to 1.6)       | 1.2 (0.8 to 1.7)       | 29.1 (25.4 to 33.1)             | 60.1 (52.6 to 68.2)             |
| Tajikistan                 | 39.4 (36.5 to 42.6)             | 53.0 (49.6 to 57.2)             | 2.2 (1.9 to 2.5)       | 4.5 (3.9 to 5.1)        | 4.6 (4.1 to 5.1)       | 6.7 (6.1 to 7.5)             | 2.1 (1.4 to 2.9)       | 2.5 (1.7 to 3.5)       | 90.3 (79.5 to 101.2)            | 149.5 (133.1 to 166.6)          |
| Turkmenistan               | 36.8 (33.8 to 40.1)             | 43.5 (40.4 to 46.9)             | 2.3 (2.0 to 2.6)       | 3.4 (3.0 to 3.8)        | 4.8 (4.4 to 5.3)       | 5.8 (5.3 to 6.3)             | 2.0 (1.4 to 2.8)       | 2.0 (1.4 to 2.8)       | 84.9 (77.0 to 93.5)             | 137.9 (125.1 to 151.0)          |
| Uzbekistan                 | 214.6 (197.9 to 231.4)          | 259.1 (238.9 to 280.9)          | 29.5 (27.5 to 31.7)    | 44.3 (41.4 to 47.5)     | 36.7 (32.1 to 41.9)    | 46.1 (40.6 to 51.9)          | 11.3 (7.8 to 15.5)     | 11.9 (8.2 to 16.4)     | 635.0 (548.0 to 733.4)          | 1,000.9 (0,874.0 to 1,140.8)    |
| South Asia                 | 10,330.3 (9,685.6 to 11,029.1)  | 11,279.2 (10,550.7 to 12,053.0) | 675.9 (600.6 to 756.3) | 970.0 (872.8 to 1071.9) | 757.8 (692.8 to 801.5) | 1,161.1 (1,100.6 to 1,220.2) | 469.3 (323.2 to 648.9) | 495.2 (342.1 to 684.1) | 16,434.1 (15,226.4 to 17,369.6) | 28,782.3 (27,445.0 to 30,260.6) |
| Bangladesh                 | 915.4 (855.8 to 975.1)          | 1,436.3 (1,343.9 to 1,528.1)    | 60.1 (53.2 to 67.1)    | 107.1 (97.4 to 118.0)   | 48.5 (41.0 to 56.5)    | 82.5 (71.5 to 94.6)          | 41.7 (28.7 to 57.4)    | 63.1 (42.8 to 87.0)    | 1,050.7 (0,885.2 to 1,230.8)    | 1,957.3 (1,672.5 to 2,274.1)    |
| Bhutan                     | 3.9 (3.7 to 4.2)                | 5.7 (5.3 to 6.1)                | 0.22 (0.19 to 0.26)    | 0.31 (0.27 to 0.36)     | 0.25 (0.19 to 0.31)    | 0.40 (0.31 to 0.52)          | 0.18 (0.13 to 0.25)    | 0.27 (0.19 to 0.38)    | 5.1 (3.9 to 6.5)                | 9.3 (6.7 to 12.1)               |
| India                      | 8,382.7 (7,844.9 to 8,955.3)    | 8,149.6 (7,575.1 to 8,728.5)    | 523.1 (459.3 to 591.1) | 680.2 (601.5 to 764.8)  | 623.0 (566.2 to 661.8) | 917.3 (866.9 to 960.0)       | 382.7 (263.1 to 527.9) | 361.8 (249.1 to 500.4) | 13,416.0 (12,381.5 to 14,199.0) | 22,827.0 (21,782.2 to 23,807.2) |
| Nepal                      | 151.8 (141.3 to 163.2)          | 215.2 (201.4 to 229.6)          | 10.3 (9.0 to 11.9)     | 19.4 (17.3 to 21.6)     | 8.9 (7.2 to 11.0)      | 21.1 (17.1 to 24.3)          | 6.7 (4.7 to 9.3)       | 9.7 (6.7 to 13.5)      | 190.6 (152.4 to 237.0)          | 472.4 (370.8 to 561.0)          |
| Pakistan                   | 876.6 (810.5 to 956.6)          | 1,472.4 (1,385.2 to 1,567.9)    | 82.1 (74.7 to 89.9)    | 162.9 (150.8 to 174.9)  | 77.1 (60.5 to 94.6)    | 139.8 (111.3 to 172.3)       | 38.0 (26.2 to 53.0)    | 60.2 (41.6 to 83.7)    | 1,771.7 (1,390.5 to 2,207.1)    | 3,516.3 (2,722.4 to 4,409.2)    |
| Southeast Asia             | 3,470.6 (3,262.0 to 3,697.6)    | 5,199.0 (4,908.8 to 5,501.0)    | 220.4 (195.1 to 247.3) | 304.6 (271.8 to 340.3)  | 228.8 (216.8 to 242.8) | 326.9 (309.1 to 347.2)       | 165.2 (113.2 to 229.5) | 246.4 (168.0 to 342.4) | 4,379.2 (4,132.8 to 4,669.5)    | 7,959.9 (7,488.7 to 8,467.1)    |
| Cambodia                   | 58.5 (54.5 to 62.5)             | 74.0 (69.2 to 79.3)             | 3.6 (3.1 to 4.1)       | 4.0 (3.5 to 4.6)        | 3.2 (2.7 to 4.0)       | 4.4 (3.9 to 4.9)             | 2.7 (1.9 to 3.8)       | 3.5 (2.4 to 4.9)       | 66.6 (54.0 to 85.4)             | 104.9 (89.0 to 121.4)           |
| Indonesia                  | 1,252.9 (1,171.3 to 1,336.9)    | 2,107.9 (1,979.2 to 2,245.1)    | 75.1 (65.4 to 85.3)    | 111.0 (97.2 to 126.2)   | 95.7 (88.6 to 104.1)   | 139.0 (127.7 to 150.7)       | 61.1 (42.2 to 84.4)    | 103.4 (70.8 to 143.5)  | 2,026.0 (1,874.1 to 2,208.9)    | 3,527.1 (3,245.2 to 3,826.8)    |
| Laos                       | 21.4 (20.0 to 23.0)             | 33.6 (31.4 to 36.0)             | 1.4 (1.2 to 1.6)       | 2.0 (1.7 to 2.3)        | 2.3 (1.9 to 2.9)       | 3.3 (2.6 to 4.0)             | 1.0 (0.7 to 1.4)       | 1.6 (1.1 to 2.2)       | 52.7 (41.5 to 65.4)             | 85.0 (64.4 to 105.1)            |
| Malaysia                   | 187.3 (173.9 to 201.2)          | 300.1 (281.5 to 319.8)          | 10.8 (9.5 to 12.4)     | 18.2 (16.0 to 20.5)     | 12.5 (11.1 to 14.1)    | 20.9 (18.7 to 23.7)          | 9.7 (6.6 to 13.4)      | 14.5 (9.9 to 20.3)     | 225.5 (199.3 to 255.3)          | 508.5 (454.1 to 577.2)          |
| Maldives                   | 1.3 (1.2 to 1.4)                | 3.0 (2.8 to 3.2)                | 0.07 (0.06 to 0.08)    | 0.12 (0.11 to 0.14)     | 0.08 (0.07 to 0.09)    | 0.19 (0.17 to 0.20)          | 0.06 (0.04 to 0.09)    | 0.16 (0.11 to 0.22)    | 1.3 (1.1 to 1.5)                | 3.9 (3.5 to 4.3)                |
| Mauritius                  | 10.3 (9.5 to 11.2)              | 16.0 (15.0 to 17.0)             | 0.51 (0.44 to 0.59)    | 0.65 (0.55 to 0.76)     | 0.75 (0.68 to 0.83)    | 1.0 (0.9 to 1.1)             | 0.52 (0.36 to 0.72)    | 0.78 (0.54 to 1.11)    | 11.6 (10.4 to 12.8)             | 22.4 (20.4 to 24.4)             |
| Myanmar                    | 219.6 (205.0 to 235.7)          | 286.1 (269.4 to 305.0)          | 16.4 (14.3 to 18.6)    | 18.5 (16.3 to 21.0)     | 15.2 (12.5 to 18.4)    | 16.7 (14.5 to 18.6)          | 9.5 (6.5 to 13.4)      | 12.4 (8.5 to 17.4)     | 278.4 (223.5 to 340.6)          | 384.9 (325.7 to 445.4)          |
| Philippines                | 477.0 (446.7 to 509.7)          | 724.7 (683.3 to 769.0)          | 38.5 (34.7 to 42.7)    | 53.5 (48.6 to 58.8)     | 43.5 (36.7 to 51.4)    | 61.7 (51.5 to 72.9)          | 21.6 (14.7 to 30.0)    | 32.8 (22.4 to 45.3)    | 860.6 (713.2 to 1037.2)         | 1,663.4 (1,369.4 to 1,990.3)    |
| Sri Lanka                  | 157.9 (146.8 to 169.1)          | 218.1 (204.0 to 233.3)          | 9.1 (7.9 to 10.5)      | 12.9 (11.4 to 14.7)     | 9.3 (7.1 to 11.0)      | 14.1 (11.7 to 17.0)          | 7.6 (5.3 to 10.6)      | 10.0 (6.8 to 13.8)     | 151.6 (112.7 to 185.7)          | 296.8 (240.2 to 359.4)          |
| Seychelles                 | 0.58 (0.55 to 0.62)             | 0.86 (0.81 to 0.92)             | 0.03 (0.02 to 0.03)    | 0.04 (0.03 to 0.05)     | 0.04 (0.04 to 0.05)    | 0.05 (0.05 to 0.06)          | 0.03 (0.02 to 0.04)    | 0.04 (0.03 to 0.06)    | 0.61 (0.53 to 0.68)             | 1.3 (1.2 to 1.4)                |
| Thailand                   | 523.9 (487.5 to 563.7)          | 727.4 (678.3 to 773.8)          | 29.6 (25.6 to 34.0)    | 38.4 (33.8 to 43.5)     | 18.3 (16.0 to 20.7)    | 26.4 (22.9 to 30.3)          | 26.3 (18.1 to 36.3)    | 34.8 (23.8 to 48.2)    | 274.0 (237.1 to 315.7)          | 547.2 (469.0 to 635.2)          |
| Timor-Leste                | 4.1 (3.8 to 4.4)                | 6.9 (6.5 to 7.4)                | 0.24 (0.20 to 0.28)    | 0.36 (0.31 to 0.42)     | 0.37 (0.30 to 0.46)    | 0.56 (0.38 to 0.73)          | 0.20 (0.14 to 0.27)    | 0.34 (0.23 to 0.46)    | 7.6 (5.9 to 9.5)                | 12.7 (8.2 to 17.0)              |
| Vietnam                    | 551.3 (515.9 to 586.9)          | 693.6 (647.8 to 743.6)          | 34.9 (30.9 to 39.2)    | 44.5 (39.8 to 49.5)     | 27.1 (22.6 to 31.1)    | 38.1 (33.9 to 44.4)          | 24.6 (16.6 to 34.4)    | 31.7 (21.4 to 43.9)    | 417.1 (338.5 to 491.5)          | 791.4 (687.3 to 943.5)          |
| East Asia                  | 13,105.0 (12,290.2 to 13,955.2) | 10,825.1 (10,067.3 to 11,659.0) | 741.7 (652.5 to 842.4) | 919.9 (810.3 to 1035.3) | 843.3 (804.1 to 885.7) | 984.6 (942.4 to 1027.7)      | 620.7 (425.6 to 862.9) | 482.1 (330.5 to 667.6) | 11,859.5 (11,271.9 to 12,503.4) | 18,574.4 (17,719.4 to 19,455.2) |
| China                      | 12,463.6 (11,686.4 to 13,274.8) | 10,316.7 (9,578.0 to 11,122.1)  | 703.4 (618.2 to 799.5) | 877.5 (772.6 to 988.8)  | 806.5 (768.4 to 846.9) | 943.6 (902.9 to 985.7)       | 590.3 (404.7 to 820.4) | 458.4 (314.0 to 634.2) | 11,319.4 (10,749.5 to 11,938.3) | 17,738.2 (16,903.2 to 18,603.7) |
| North Korea                | 210.5 (197.2 to 225.3)          | 138.8 (129.4 to 148.5)          | 15.0 (13.2 to 17.1)    | 12.8 (11.2 to 14.5)     | 16.1 (11.5 to 20.3)    | 14.4 (11.5 to 17.3)          | 9.7 (6.6 to 13.3)      | 6.4 (4.4 to 8.9)       | 264.2 (195.9 to 337.0)          | 349.4 (270.7 to 429.3)          |
| Taiwan (Province of China) | 219.8 (206.0 to 234.2)          | 195.2 (182.2 to 208.6)          | 11.3 (10.0 to 13.0)    | 14.8 (12.8 to 16.9)     | 7.1 (6.5 to 7.8)       | 10.8 (10.0 to 11.5)          | 10.7 (7.4 to 14.8)     | 9.6 (6.7 to 13.2)      | 84.9 (77.5 to 93.1)             | 187.6 (173.1 to 203.6)          |
| Oceania                    | 51.7 (48.6 to 55.2)             | 68.4 (64.6 to 72.9)             | 2.6 (2.3 to 3.0)       | 4.7 (4.0 to 5.3)        | 5.2 (4.5 to 6.1)       | 10.1 (8.5 to 12.1)           | 2.4 (1.7 to 3.3)       | 3.1 (2.1 to 4.3)       | 144.7 (118.1 to 174.8)          | 323.3 (265.7 to 396.5)          |
| American Samoa             | 0.34 (0.32 to 0.36)             | 0.38 (0.36 to 0.41)             | 0.01 (0.01 to 0.02)    | 0.02 (0.02 to 0.02)     | 0.02 (0.02 to 0.02)    | 0.03 (0.03 to 0.04)          | 0.02 (0.01 to 0.02)    | 0.02 (0.01 to 0.02)    | 0.41 (0.36 to 0.46)             | 0.84 (0.71 to 0.97)             |

|                                |                              |                              |                        |                        |                        |                        |                        |                        |                              |                              |
|--------------------------------|------------------------------|------------------------------|------------------------|------------------------|------------------------|------------------------|------------------------|------------------------|------------------------------|------------------------------|
| Federated States of Micronesia | 0.51 (0.48 to 0.55)          | 0.56 (0.52 to 0.60)          | 0.03 (0.02 to 0.03)    | 0.03 (0.03 to 0.04)    | 0.05 (0.04 to 0.06)    | 0.08 (0.06 to 0.09)    | 0.02 (0.02 to 0.03)    | 0.03 (0.02 to 0.04)    | 1.2 (0.9 to 1.5)             | 2.3 (1.7 to 2.9)             |
| Fiji                           | 5.7 (5.3 to 6.1)             | 6.2 (5.8 to 6.7)             | 0.28 (0.24 to 0.32)    | 0.37 (0.31 to 0.43)    | 0.45 (0.38 to 0.54)    | 1.0 (0.8 to 1.1)       | 0.27 (0.18 to 0.37)    | 0.29 (0.20 to 0.41)    | 9.7 (8.0 to 11.7)            | 27.4 (23.2 to 31.9)          |
| Guam                           | 1.2 (1.1 to 1.3)             | 1.3 (1.2 to 1.4)             | 0.05 (0.05 to 0.06)    | 0.07 (0.06 to 0.08)    | 0.14 (0.12 to 0.15)    | 0.20 (0.18 to 0.22)    | 0.06 (0.04 to 0.08)    | 0.07 (0.04 to 0.09)    | 2.5 (2.3 to 2.8)             | 5.0 (4.5 to 5.5)             |
| Kiribati                       | 0.60 (0.56 to 0.65)          | 0.54 (0.50 to 0.58)          | 0.03 (0.03 to 0.03)    | 0.03 (0.03 to 0.04)    | 0.04 (0.03 to 0.05)    | 0.07 (0.06 to 0.08)    | 0.03 (0.02 to 0.04)    | 0.03 (0.02 to 0.03)    | 1.0 (0.8 to 1.2)             | 2.4 (1.9 to 2.9)             |
| Marshall Islands               | 0.20 (0.19 to 0.22)          | 0.25 (0.23 to 0.27)          | 0.01 (0.01 to 0.01)    | 0.01 (0.01 to 0.02)    | 0.03 (0.02 to 0.03)    | 0.05 (0.04 to 0.05)    | 0.01 (0.01 to 0.01)    | 0.01 (0.01 to 0.02)    | 0.72 (0.56 to 0.90)          | 1.4 (1.1 to 1.7)             |
| Northern Mariana Islands       | 0.40 (0.37 to 0.43)          | 0.50 (0.47 to 0.54)          | 0.02 (0.01 to 0.02)    | 0.02 (0.02 to 0.03)    | 0.01 (0.01 to 0.02)    | 0.03 (0.02 to 0.03)    | 0.02 (0.01 to 0.03)    | 0.02 (0.02 to 0.03)    | 0.28 (0.24 to 0.32)          | 0.71 (0.61 to 0.82)          |
| Papua New Guinea               | 34.7 (32.5 to 37.2)          | 48.6 (45.7 to 51.9)          | 1.8 (1.6 to 2.1)       | 3.5 (3.0 to 4.0)       | 3.7 (3.0 to 4.5)       | 7.3 (5.8 to 9.2)       | 1.6 (1.1 to 2.2)       | 2.1 (1.5 to 3.0)       | 108.6 (84.5 to 137.1)        | 243.0 (189.8 to 313.5)       |
| Samoa                          | 1.1 (1.0 to 1.2)             | 1.2 (1.1 to 1.3)             | 0.05 (0.04 to 0.06)    | 0.07 (0.06 to 0.08)    | 0.09 (0.08 to 0.11)    | 0.11 (0.09 to 0.12)    | 0.05 (0.04 to 0.07)    | 0.06 (0.04 to 0.08)    | 1.7 (1.3 to 2.0)             | 2.6 (2.1 to 3.1)             |
| Solomon Islands                | 2.2 (2.1 to 2.4)             | 2.8 (2.6 to 3.0)             | 0.11 (0.10 to 0.13)    | 0.17 (0.14 to 0.19)    | 0.26 (0.22 to 0.30)    | 0.40 (0.34 to 0.47)    | 0.11 (0.08 to 0.15)    | 0.14 (0.09 to 0.19)    | 6.9 (5.6 to 8.4)             | 11.2 (9.2 to 13.4)           |
| Tonga                          | 0.64 (0.59 to 0.68)          | 0.66 (0.61 to 0.70)          | 0.03 (0.03 to 0.04)    | 0.04 (0.03 to 0.04)    | 0.03 (0.02 to 0.04)    | 0.06 (0.05 to 0.07)    | 0.03 (0.02 to 0.04)    | 0.03 (0.02 to 0.05)    | 0.49 (0.39 to 0.59)          | 1.4 (1.2 to 1.7)             |
| Vanuatu                        | 1.3 (1.2 to 1.4)             | 1.6 (1.5 to 1.7)             | 0.06 (0.05 to 0.07)    | 0.10 (0.08 to 0.11)    | 0.14 (0.11 to 0.18)    | 0.26 (0.19 to 0.33)    | 0.06 (0.04 to 0.08)    | 0.08 (0.05 to 0.11)    | 3.2 (2.4 to 4.2)             | 7.2 (5.2 to 9.5)             |
| High-income Asia Pacific       | 1,942.0 (1,746.7 to 2,146.7) | 2,629.0 (2,393.1 to 2,877.2) | 184.6 (158.4 to 216.5) | 253.8 (220.7 to 293.0) | 89.8 (86.2 to 93.2)    | 89.8 (86.3 to 93.5)    | 85.4 (58.9 to 115.8)   | 85.6 (59.8 to 117.3)   | 778.2 (744.5 to 812.3)       | 1,324.6 (1,264.6 to 1,383.7) |
| Brunei                         | 1.1 (1.0 to 1.2)             | 2.2 (2.0 to 2.4)             | 0.10 (0.08 to 0.11)    | 0.23 (0.20 to 0.27)    | 0.10 (0.09 to 0.11)    | 0.17 (0.15 to 0.19)    | 0.05 (0.03 to 0.07)    | 0.07 (0.05 to 0.10)    | 1.8 (1.6 to 2.0)             | 4.6 (4.1 to 5.1)             |
| Japan                          | 1,625.3 (1,453.4 to 1,805.2) | 2,134.0 (1,925.1 to 2,352.2) | 155.4 (132.2 to 183.9) | 206.8 (178.1 to 240.2) | 75.8 (73.0 to 78.7)    | 75.3 (72.3 to 78.4)    | 71.0 (49.0 to 96.1)    | 68.7 (48.3 to 93.9)    | 630.9 (605.0 to 658.4)       | 1,061.6 (1,015.5 to 1,109.0) |
| Singapore                      | 32.6 (29.8 to 35.4)          | 63.7 (59.5 to 67.2)          | 3.7 (3.6 to 3.9)       | 7.2 (7.0 to 7.4)       | 1.2 (1.1 to 1.3)       | 2.2 (2.0 to 2.4)       | 1.4 (1.0 to 2.0)       | 1.7 (1.1 to 2.3)       | 15.5 (14.0 to 17.4)          | 45.5 (40.9 to 50.8)          |
| South Korea                    | 283.0 (254.5 to 313.0)       | 429.1 (393.6 to 466.5)       | 25.4 (21.9 to 29.5)    | 39.6 (34.0 to 45.7)    | 12.7 (11.4 to 14.0)    | 12.1 (10.9 to 13.3)    | 12.9 (8.8 to 17.6)     | 15.1 (10.4 to 20.7)    | 130.0 (116.2 to 143.4)       | 212.9 (190.3 to 236.5)       |
| High-income North America      | 3,893.0 (3,541.4 to 4,304.3) | 6,463.2 (5,883.0 to 7,132.6) | 442.1 (407.0 to 482.9) | 694.9 (636.7 to 760.5) | 270.7 (259.7 to 282.1) | 310.9 (301.1 to 320.9) | 117.6 (83.3 to 158.6)  | 149.6 (105.0 to 203.4) | 3,140.2 (3,005.2 to 3,271.4) | 5,280.8 (5,098.0 to 5,466.6) |
| Canada                         | 256.9 (219.2 to 297.4)       | 583.5 (527.4 to 644.7)       | 27.2 (23.1 to 31.5)    | 63.9 (55.2 to 73.2)    | 22.5 (20.9 to 24.3)    | 25.9 (24.0 to 27.8)    | 13.7 (9.4 to 18.8)     | 17.2 (11.9 to 23.8)    | 223.6 (206.1 to 242.4)       | 406.6 (375.0 to 438.8)       |
| Greenland                      | 0.18 (0.16 to 0.21)          | 0.71 (0.65 to 0.78)          | 0.01 (0.01 to 0.02)    | 0.09 (0.08 to 0.10)    | 0.01 (0.01 to 0.02)    | 0.04 (0.03 to 0.04)    | 0.01 (0.01 to 0.01)    | 0.01 (0.01 to 0.02)    | 0.24 (0.20 to 0.28)          | 0.83 (0.76 to 0.90)          |
| United States                  | 3,635.9 (3,303.2 to 4,023.2) | 5,878.8 (5,336.8 to 6,486.0) | 414.9 (381.7 to 453.1) | 630.9 (581.1 to 688.6) | 248.2 (238.0 to 258.8) | 285.0 (275.6 to 294.5) | 103.8 (73.5 to 140.1)  | 132.4 (92.7 to 179.7)  | 2,916.4 (2,785.0 to 3,042.2) | 4,873.2 (4,701.7 to 5,059.6) |
| Western Europe                 | 5,398.1 (4,995.8 to 5,837.7) | 8,066.2 (7,443.0 to 8,695.6) | 600.3 (539.8 to 672.2) | 880.2 (792.5 to 977.0) | 316.8 (300.1 to 345.4) | 345.4 (331.2 to 367.9) | 210.2 (144.5 to 285.8) | 285.1 (198.1 to 387.6) | 2,883.0 (2,725.1 to 3,106.4) | 4,936.2 (4,719.6 to 5,202.8) |
| Andorra                        | 0.68 (0.63 to 0.73)          | 1.2 (1.1 to 1.3)             | 0.07 (0.06 to 0.08)    | 0.14 (0.12 to 0.16)    | 0.03 (0.03 to 0.04)    | 0.05 (0.04 to 0.06)    | 0.03 (0.02 to 0.04)    | 0.04 (0.03 to 0.06)    | 0.31 (0.24 to 0.38)          | 0.83 (0.71 to 0.98)          |
| Austria                        | 100.5 (92.0 to 109.8)        | 151.8 (139.9 to 164.4)       | 11.8 (10.6 to 13.4)    | 16.0 (14.3 to 18.1)    | 9.1 (8.4 to 10.3)      | 8.6 (7.9 to 9.6)       | 4.4 (3.0 to 6.1)       | 6.4 (4.4 to 8.6)       | 79.4 (73.0 to 88.5)          | 119.2 (109.3 to 130.4)       |
| Belgium                        | 130.5 (118.4 to 141.4)       | 200.5 (185.3 to 217.4)       | 14.7 (12.9 to 16.8)    | 22.6 (19.9 to 25.7)    | 7.3 (6.6 to 8.2)       | 8.1 (7.5 to 8.8)       | 5.5 (3.8 to 7.4)       | 7.3 (5.1 to 10.1)      | 69.2 (62.8 to 76.9)          | 115.5 (106.3 to 125.6)       |
| Cyprus                         | 9.5 (8.7 to 10.3)            | 15.3 (13.8 to 17.0)          | 0.57 (0.49 to 0.68)    | 1.2 (1.0 to 1.4)       | 0.54 (0.48 to 0.64)    | 1.0 (0.9 to 1.1)       | 0.46 (0.32 to 0.64)    | 0.70 (0.49 to 0.95)    | 6.3 (5.6 to 7.4)             | 18.0 (15.9 to 20.4)          |
| Denmark                        | 63.8 (58.9 to 69.2)          | 105.3 (96.8 to 114.5)        | 7.4 (6.4 to 8.7)       | 11.6 (10.0 to 13.6)    | 3.1 (2.9 to 3.5)       | 3.8 (3.5 to 4.1)       | 2.2 (1.5 to 3.0)       | 3.4 (2.4 to 4.7)       | 29.3 (26.6 to 32.3)          | 54.3 (50.1 to 59.4)          |
| Finland                        | 80.0 (71.8 to 88.5)          | 121.3 (110.3 to 132.3)       | 9.2 (8.1 to 10.5)      | 13.1 (11.7 to 14.9)    | 5.7 (5.3 to 6.4)       | 6.7 (6.2 to 7.3)       | 3.7 (2.5 to 5.0)       | 4.9 (3.4 to 6.7)       | 50.9 (46.5 to 56.4)          | 98.1 (90.0 to 108.5)         |
| France                         | 727.2 (667.0 to 787.6)       | 1,044.7 (962.4 to 1,138.6)   | 74.8 (66.2 to 84.9)    | 102.0 (90.6 to 114.9)  | 32.7 (29.8 to 36.3)    | 35.7 (33.0 to 38.9)    | 27.6 (19.1 to 38.1)    | 36.1 (24.8 to 49.4)    | 264.6 (241.9 to 292.5)       | 484.9 (446.9 to 528.6)       |
| Germany                        | 1,132.8 (1,034.5 to 1,239.7) | 1,726.4 (1,572.2 to 1,878.2) | 144.2 (131.8 to 156.6) | 195.1 (178.2 to 211.5) | 95.1 (83.1 to 108.8)   | 97.8 (87.1 to 110.3)   | 45.7 (31.7 to 62.4)    | 65.5 (45.3 to 89.1)    | 873.7 (754.3 to 1003.4)      | 1,393.7 (1,228.4 to 1,583.9) |
| Greece                         | 136.0 (122.6 to 149.2)       | 208.6 (186.6 to 230.4)       | 16.2 (14.1 to 18.8)    | 24.2 (21.5 to 27.4)    | 11.8 (10.8 to 13.0)    | 13.9 (13.0 to 14.8)    | 6.1 (4.2 to 8.3)       | 9.3 (6.4 to 12.6)      | 123.8 (112.9 to 135.1)       | 213.5 (199.0 to 228.6)       |
| Iceland                        | 2.6 (2.4 to 2.8)             | 4.7 (4.3 to 5.2)             | 0.30 (0.26 to 0.35)    | 0.58 (0.51 to 0.68)    | 0.16 (0.15 to 0.17)    | 0.28 (0.27 to 0.30)    | 0.11 (0.07 to 0.15)    | 0.20 (0.14 to 0.27)    | 1.3 (1.2 to 1.4)             | 3.9 (3.8 to 4.2)             |
| Ireland                        | 39.1 (35.8 to 42.4)          | 68.0 (62.2 to 73.9)          | 3.9 (3.3 to 4.5)       | 7.2 (6.2 to 8.3)       | 2.3 (2.1 to 2.5)       | 3.1 (2.8 to 3.4)       | 1.7 (1.2 to 2.3)       | 2.5 (1.8 to 3.5)       | 23.6 (21.2 to 26.1)          | 48.4 (44.2 to 53.2)          |
| Israel                         | 59.3 (54.0 to 64.4)          | 101.5 (92.7 to 111.0)        | 6.0 (5.2 to 7.1)       | 10.5 (9.0 to 12.1)     | 2.8 (2.6 to 3.1)       | 3.2 (3.0 to 3.5)       | 2.6 (1.8 to 3.5)       | 4.2 (2.9 to 5.7)       | 26.7 (24.4 to 29.4)          | 46.9 (42.9 to 51.3)          |
| Italy                          | 869.0 (800.0 to 937.2)       | 1,232.9 (1,117.6 to 1,336.7) | 94.1 (85.2 to 104.6)   | 133.2 (121.1 to 147.3) | 48.6 (44.2 to 55.9)    | 47.9 (43.9 to 52.9)    | 34.7 (24.1 to 47.5)    | 46.8 (32.6 to 64.1)    | 404.3 (365.5 to 457.4)       | 624.0 (572.1 to 683.4)       |
| Luxembourg                     | 5.0 (4.6 to 5.5)             | 7.9 (7.2 to 8.7)             | 0.39 (0.33 to 0.46)    | 0.70 (0.60 to 0.80)    | 0.32 (0.27 to 0.37)    | 0.34 (0.30 to 0.38)    | 0.23 (0.16 to 0.31)    | 0.35 (0.25 to 0.48)    | 2.9 (2.5 to 3.5)             | 5.1 (4.4 to 5.8)             |
| Malta                          | 4.3 (3.9 to 4.8)             | 7.3 (6.5 to 8.1)             | 0.30 (0.26 to 0.35)    | 0.67 (0.58 to 0.78)    | 0.46 (0.43 to 0.49)    | 0.51 (0.48 to 0.54)    | 0.23 (0.16 to 0.31)    | 0.36 (0.25 to 0.50)    | 5.1 (4.7 to 5.5)             | 7.9 (7.4 to 8.4)             |
| Netherlands                    | 222.2 (205.2 to 238.9)       | 374.3 (346.3 to 402.0)       | 25.2 (21.6 to 29.1)    | 42.3 (36.8 to 48.9)    | 8.5 (7.8 to 9.3)       | 9.8 (9.1 to 10.6)      | 7.5 (5.2 to 10.3)      | 11.0 (7.6 to 15.1)     | 84.5 (77.0 to 92.5)          | 144.2 (133.4 to 156.1)       |

|                |                        |                              |                       |                        |                     |                     |                     |                     |                        |                        |
|----------------|------------------------|------------------------------|-----------------------|------------------------|---------------------|---------------------|---------------------|---------------------|------------------------|------------------------|
| Norway         | 51.2 (47.3 to 55.6)    | 77.7 (70.8 to 85.2)          | 5.3 (4.5 to 6.2)      | 8.9 (7.7 to 10.4)      | 3.1 (3.0 to 3.4)    | 3.4 (3.3 to 3.6)    | 2.1 (1.5 to 2.9)    | 2.6 (1.8 to 3.6)    | 27.1 (25.9 to 28.8)    | 48.3 (46.0 to 51.4)    |
| Portugal       | 115.6 (104.9 to 126.7) | 150.1 (134.3 to 164.9)       | 7.2 (6.2 to 8.4)      | 9.5 (8.3 to 11.0)      | 7.0 (6.4 to 7.7)    | 6.8 (6.2 to 7.4)    | 4.8 (3.3 to 6.6)    | 5.7 (3.9 to 7.7)    | 65.4 (59.2 to 72.0)    | 98.3 (89.5 to 107.6)   |
| Spain          | 532.5 (482.2 to 587.0) | 735.6 (674.5 to 804.0)       | 44.2 (39.3 to 50.0)   | 67.1 (59.4 to 76.1)    | 26.7 (24.4 to 29.7) | 28.6 (26.5 to 31.0) | 20.3 (13.9 to 28.2) | 26.5 (18.4 to 36.2) | 231.4 (211.5 to 255.8) | 419.1 (387.3 to 453.6) |
| Sweden         | 155.1 (141.0 to 170.1) | 232.4 (208.7 to 257.1)       | 12.9 (11.7 to 14.4)   | 20.6 (18.9 to 22.7)    | 8.5 (7.9 to 9.5)    | 9.8 (9.0 to 10.9)   | 7.6 (5.3 to 10.4)   | 9.7 (6.7 to 13.0)   | 75.1 (68.9 to 83.1)    | 127.9 (118.7 to 140.0) |
| Switzerland    | 83.9 (77.6 to 90.5)    | 137.9 (128.1 to 148.3)       | 9.1 (8.0 to 10.5)     | 15.1 (13.3 to 17.1)    | 5.7 (5.2 to 6.7)    | 5.6 (5.2 to 6.3)    | 3.6 (2.5 to 4.9)    | 5.0 (3.5 to 6.9)    | 45.1 (40.6 to 51.9)    | 71.8 (65.2 to 79.7)    |
| United Kingdom | 871.8 (799.0 to 950.6) | 1,352.4 (1,239.8 to 1,476.2) | 111.6 (95.5 to 130.7) | 176.8 (152.1 to 204.6) | 36.8 (35.8 to 37.7) | 50.3 (49.2 to 51.6) | 28.7 (19.9 to 39.0) | 36.2 (25.2 to 49.1) | 390.0 (380.1 to 401.2) | 787.2 (770.6 to 806.9) |
| Australasia    | 259.3 (231.3 to 292.5) | 486.1 (444.3 to 528.5)       | 25.1 (22.3 to 28.3)   | 52.0 (46.1 to 58.7)    | 15.1 (13.6 to 16.5) | 18.6 (16.9 to 20.6) | 11.1 (7.7 to 15.2)  | 12.6 (8.8 to 17.1)  | 136.3 (121.8 to 151.7) | 268.4 (241.7 to 300.0) |
| Australia      | 208.5 (185.2 to 236.7) | 408.4 (375.0 to 444.9)       | 19.7 (17.3 to 22.3)   | 43.1 (37.9 to 49.2)    | 12.5 (11.1 to 13.8) | 15.2 (13.6 to 17.1) | 9.1 (6.3 to 12.5)   | 10.3 (7.1 to 14.1)  | 110.8 (96.7 to 126.0)  | 217.0 (190.3 to 247.3) |
| New Zealand    | 50.9 (45.5 to 56.3)    | 77.6 (69.6 to 86.9)          | 5.4 (4.9 to 6.1)      | 8.9 (8.0 to 9.9)       | 2.6 (2.4 to 2.8)    | 3.4 (3.2 to 3.6)    | 2.0 (1.4 to 2.7)    | 2.3 (1.6 to 3.1)    | 25.5 (23.7 to 27.6)    | 51.4 (48.0 to 55.2)    |

Data in parentheses are 95% uncertainty intervals. YLDs= years lived with disability; YLLs= years of life lost; SDI= Socio-demographic Index.

**Table S2. Age-standardised prevalence, incidence, death, YLD, and YLL rates of ischaemic heart disease for both sexes in 2017, and their percentage changes from 1990 to 2017, by country and territory**

|                                    | Prevalence                                    |                                                        | Incidence                                     |                                                        | Deaths                                        |                                                        | YLDs                                          |                                                        | YLLs                                          |                                                        |
|------------------------------------|-----------------------------------------------|--------------------------------------------------------|-----------------------------------------------|--------------------------------------------------------|-----------------------------------------------|--------------------------------------------------------|-----------------------------------------------|--------------------------------------------------------|-----------------------------------------------|--------------------------------------------------------|
|                                    | 2017 age-standardised rate per 100 000 people | Percentage change in age-standardised rates, 1990–2017 | 2017 age-standardised rate per 100 000 people | Percentage change in age-standardised rates, 1990–2017 | 2017 age-standardised rate per 100 000 people | Percentage change in age-standardised rates, 1990–2017 | 2017 age-standardised rate per 100 000 people | Percentage change in age-standardised rates, 1990–2017 | 2017 age-standardised rate per 100 000 people | Percentage change in age-standardised rates, 1990–2017 |
| <b>Central Sub-Saharan Africa</b>  |                                               |                                                        |                                               |                                                        |                                               |                                                        |                                               |                                                        |                                               |                                                        |
| Angola                             | 1145.6 (1063.5 to 1232.1)                     | -21.0% (-23.9 to -18.1)                                | 98.0 (85.0 to 112.5)                          | -25.7% (-29.2 to -21.7)                                | 115.1 (97.8 to 135.8)                         | -34.1% (-45.0 to -19.2)                                | 52.0 (35.9 to 71.1)                           | -22.2% (-26.2 to -18.3)                                | 2038.7 (1721.0 to 2408.2)                     | -36.8% (-48.7 to -19.3)                                |
| Central African Republic           | 1245.0 (1153.9 to 1346.0)                     | -12.8% (-16.1 to -8.9)                                 | 110.1 (95.4 to 126.5)                         | -13.3% (-17.1 to -9.3)                                 | 188.9 (156.6 to 219.9)                        | -10.0% (-23.3 to 7.3)                                  | 58.1 (40.5 to 79.3)                           | -14.1% (-18.2 to -9.7)                                 | 3781.2 (3081.5 to 4492.2)                     | -6.3% (-21.2 to 14.2)                                  |
| Congo                              | 1266.1 (1171.5 to 1367.5)                     | -21.6% (-24.6 to -18.4)                                | 104.4 (90.6 to 119.8)                         | -24.8% (-28.4 to -20.8)                                | 159.3 (135.4 to 184.0)                        | -31.4% (-42.5 to -19.3)                                | 58.1 (40.1 to 80.0)                           | -23.0% (-26.8 to -19.2)                                | 2853.6 (2407.5 to 3310.6)                     | -35.4% (-46.5 to -23.1)                                |
| Democratic Republic of the Congo   | 1397.0 (1302.1 to 1501.7)                     | -11.1% (-14.6 to -7.5)                                 | 137.8 (124.1 to 154.5)                        | -14.6% (-18.8 to -10.0)                                | 143.1 (120.7 to 167.4)                        | -11.0% (-24.7 to 4.2)                                  | 63.0 (43.6 to 85.9)                           | -10.3% (-14.5 to -5.9)                                 | 2565.5 (2157.4 to 3015.3)                     | -10.1% (-25.7 to 7.5)                                  |
| Equatorial Guinea                  | 984.4 (913.3 to 1062.3)                       | -31.2% (-34.2 to -28.2)                                | 74.1 (63.9 to 85.4)                           | -37.7% (-40.9 to -34.2)                                | 82.2 (60.5 to 108.3)                          | -64.5% (-73.8 to -52.7)                                | 43.6 (30.3 to 60.0)                           | -38.5% (-42.1 to -35.1)                                | 1310.5 (923.9 to 1810.7)                      | -70.4% (-79.0 to -58.8)                                |
| Gabon                              | 1224.5 (1137.0 to 1320.4)                     | -8.4% (-11.9 to -4.8)                                  | 91.4 (78.6 to 105.2)                          | -9.5% (-13.4 to -5.1)                                  | 121.2 (105.5 to 137.6)                        | -25.4% (-35.7 to -12.9)                                | 56.6 (39.1 to 77.1)                           | -9.7% (-14.1 to -5.1)                                  | 2112.7 (1836.0 to 2432.5)                     | -27.0% (-38.5 to -12.8)                                |
| <b>Eastern Sub-Saharan Africa</b>  |                                               |                                                        |                                               |                                                        |                                               |                                                        |                                               |                                                        |                                               |                                                        |
| Burundi                            | 1856.0 (1731.5 to 1990.2)                     | -1.9% (-5.8 to 2.5)                                    | 118.6 (102.5 to 136.2)                        | -6.4% (-10.5 to -2.3)                                  | 125.8 (106.1 to 147.3)                        | -23.5% (-36.1 to -9.7)                                 | 95.9 (65.8 to 131.9)                          | -2.5% (-7.1 to 2.3)                                    | 2244.2 (1881.8 to 2674.8)                     | -25.1% (-39.4 to -9.3)                                 |
| Comoros                            | 1646.5 (1529.1 to 1769.1)                     | -13.7% (-16.9 to -10.2)                                | 99.1 (85.3 to 114.6)                          | -10.2% (-14.3 to -5.9)                                 | 130.5 (110.0 to 153.2)                        | -24.4% (-37.3 to -11.1)                                | 86.6 (59.5 to 119.0)                          | -13.5% (-17.6 to -9.3)                                 | 2322.8 (1927.6 to 2769.3)                     | -26.5% (-40.2 to -11.5)                                |
| Djibouti                           | 1597.0 (1485.8 to 1712.0)                     | 0.9% (-3.1 to 4.5)                                     | 98.7 (84.4 to 114.1)                          | 1.7% (-2.9 to 6.4)                                     | 128.0 (98.4 to 161.7)                         | -2.9% (-24.7 to 25.6)                                  | 84.3 (58.3 to 116.1)                          | 1.7% (-3.2 to 7.1)                                     | 2352.1 (1733.5 to 3071.8)                     | 2.0% (-24.4 to 38.4)                                   |
| Eritrea                            | 1201.0 (1116.0 to 1291.2)                     | -10.7% (-13.8 to -7.6)                                 | 85.7 (74.1 to 99.2)                           | -9.5% (-13.5 to -5.3)                                  | 121.5 (99.8 to 143.7)                         | -19.7% (-33.0 to -3.5)                                 | 61.0 (41.9 to 82.9)                           | -10.9% (-15.3 to -6.4)                                 | 2289.6 (1883.2 to 2695.6)                     | -22.9% (-37.1 to -2.8)                                 |
| Ethiopia                           | 1555.0 (1448.1 to 1671.4)                     | -8.3% (-10.3 to -6.3)                                  | 103.1 (89.4 to 118.2)                         | -20.5% (-23.8 to -17.3)                                | 82.6 (69.4 to 96.5)                           | -51.9% (-62.1 to -41.4)                                | 77.4 (52.9 to 107.1)                          | -7.0% (-9.6 to -4.5)                                   | 1444.4 (1229.2 to 1671.2)                     | -57.4% (-67.4 to -46.4)                                |
| Kenya                              | 1720.0 (1601.7 to 1844.2)                     | -8.6% (-9.5 to -7.5)                                   | 92.1 (79.4 to 106.2)                          | -6.4% (-7.4 to -5.5)                                   | 89.0 (77.0 to 105.8)                          | 16.9% (8.0 to 28.3)                                    | 91.2 (62.9 to 125.1)                          | -8.8% (-9.7 to -7.9)                                   | 1562.6 (1366.3 to 1830.4)                     | 28.9% (18.1 to 43.2)                                   |
| Madagascar                         | 1726.5 (1611.7 to 1856.7)                     | -4.4% (-7.9 to -0.4)                                   | 117.4 (102.6 to 132.5)                        | -12.4% (-16.3 to -8.0)                                 | 136.3 (116.3 to 159.4)                        | -13.6% (-26.5 to 1.1)                                  | 88.7 (61.1 to 122.0)                          | -4.3% (-8.7 to 0.1)                                    | 2489.8 (2082.4 to 2970.9)                     | -12.4% (-27.5 to 4.4)                                  |
| Malawi                             | 1867.8 (1738.9 to 1999.9)                     | -8.0% (-11.4 to -4.1)                                  | 116.0 (101.6 to 132.2)                        | -14.0% (-18.2 to -10.0)                                | 103.7 (89.6 to 119.0)                         | -21.2% (-34.7 to 5.7)                                  | 96.8 (66.2 to 133.4)                          | -8.2% (-12.2 to -3.8)                                  | 1920.1 (1655.9 to 2211.3)                     | -19.5% (-35.0 to 21.4)                                 |
| Mozambique                         | 1738.3 (1615.0 to 1877.2)                     | -9.5% (-12.7 to -6.0)                                  | 114.1 (99.8 to 129.8)                         | -13.0% (-16.8 to -9.2)                                 | 111.1 (94.8 to 128.2)                         | -15.2% (-28.9 to 2.3)                                  | 89.9 (62.0 to 122.9)                          | -11.5% (-15.6 to -7.4)                                 | 2107.7 (1812.5 to 2434.8)                     | -10.4% (-26.8 to 11.2)                                 |
| Rwanda                             | 1220.2 (1135.7 to 1309.6)                     | -12.7% (-15.6 to -9.4)                                 | 84.1 (72.9 to 97.4)                           | -13.4% (-17.5 to -9.6)                                 | 61.2 (42.7 to 81.1)                           | -30.8% (-46.3 to -9.6)                                 | 62.7 (42.6 to 85.7)                           | -13.9% (-17.9 to -9.4)                                 | 975.0 (682.5 to 1287.4)                       | -34.8% (-51.0 to -10.9)                                |
| Somalia                            | 1591.1 (1483.8 to 1705.1)                     | -6.9% (-10.1 to -3.3)                                  | 115.0 (100.2 to 132.0)                        | -6.7% (-11.0 to -2.5)                                  | 162.6 (126.1 to 204.0)                        | -1.4% (-23.5 to 32.4)                                  | 82.8 (57.2 to 114.4)                          | -6.6% (-10.8 to -2.2)                                  | 3095.6 (2370.6 to 3974.7)                     | 3.8% (-24.6 to 54.2)                                   |
| South Sudan                        | 1503.3 (1394.6 to 1614.8)                     | 0.5% (-2.9 to 4.3)                                     | 100.4 (86.5 to 115.9)                         | -1.8% (-6.4 to 3.2)                                    | 121.0 (93.9 to 153.6)                         | -2.2% (-23.8 to 30.2)                                  | 76.4 (52.5 to 104.7)                          | 2.3% (-2.6 to 7.3)                                     | 2242.7 (1693.0 to 2921.4)                     | 7.3% (-20.9 to 53.3)                                   |
| Tanzania                           | 1407.7 (1297.9 to 1519.5)                     | -2.7% (-6.2 to 1.1)                                    | 109.7 (96.9 to 124.4)                         | -7.1% (-11.0 to -2.8)                                  | 102.4 (86.7 to 120.7)                         | -6.4% (-20.9 to 13.9)                                  | 72.3 (49.6 to 99.2)                           | -2.4% (-6.7 to 2.9)                                    | 1821.6 (1534.6 to 2150.1)                     | -4.7% (-21.1 to 19.9)                                  |
| Uganda                             | 1293.4 (1202.5 to 1387.7)                     | -12.7% (-15.6 to -9.7)                                 | 92.3 (80.1 to 105.1)                          | -13.5% (-17.4 to -9.7)                                 | 86.6 (70.0 to 103.6)                          | 0.7% (-17.6 to 28.5)                                   | 65.1 (44.7 to 88.8)                           | -13.9% (-18.0 to -9.8)                                 | 1482.0 (1194.4 to 1796.2)                     | 7.5% (-15.3 to 39.3)                                   |
| Zambia                             | 1521.1 (1413.1 to 1637.6)                     | -9.8% (-13.3 to -6.4)                                  | 108.2 (94.2 to 124.1)                         | -16.9% (-20.6 to -12.5)                                | 107.7 (95.9 to 120.3)                         | -27.8% (-38.5 to -14.4)                                | 77.9 (53.4 to 106.7)                          | -8.9% (-13.0 to -4.5)                                  | 1991.0 (1754.6 to 2239.8)                     | -27.6% (-39.6 to -11.7)                                |
| <b>Southern Sub-Saharan Africa</b> |                                               |                                                        |                                               |                                                        |                                               |                                                        |                                               |                                                        |                                               |                                                        |
| Botswana                           | 1575.7 (1461.1 to 1692.4)                     | 3.3% (-0.2 to 7.0)                                     | 101.5 (86.7 to 117.5)                         | -1.0% (-5.1 to 3.3)                                    | 103.4 (93.2 to 116.5)                         | -7.4% (-20.9 to 9.6)                                   | 77.4 (53.6 to 105.5)                          | 2.7% (-2.1 to 7.7)                                     | 1590.8 (1420.8 to 1798.0)                     | -15.3% (-29.1 to 1.8)                                  |
| Lesotho                            | 1581.0 (1469.4 to 1696.8)                     | 7.0% (3.3 to 11.0)                                     | 114.0 (98.7 to 131.5)                         | 5.7% (0.7 to 10.2)                                     | 146.8 (117.9 to 177.6)                        | 41.4% (12.7 to 74.9)                                   | 77.0 (53.3 to 105.6)                          | 5.5% (0.6 to 10.7)                                     | 2647.3 (2122.9 to 3223.0)                     | 50.9% (19.0 to 89.7)                                   |
| Namibia                            | 1388.0 (1288.0 to 1488.9)                     | -15.0% (-18.2 to -11.9)                                | 95.6 (82.1 to 110.0)                          | -15.2% (-19.4 to -10.8)                                | 101.4 (89.3 to 116.1)                         | -32.1% (-40.5 to -20.9)                                | 68.0 (47.0 to 92.5)                           | -16.1% (-20.3 to -12.0)                                | 1648.8 (1433.9 to 1913.9)                     | -36.8% (-45.5 to -25.4)                                |
| South Africa                       | 1545.5 (1428.4 to 1667.3)                     | -11.8% (-13.5 to -10.2)                                | 112.3 (97.4 to 128.6)                         | -9.8% (-11.4 to -8.3)                                  | 83.5 (79.7 to 87.9)                           | 2.0% (-6.5 to 11.1)                                    | 73.3 (50.6 to 99.6)                           | -12.9% (-14.4 to -11.1)                                | 1410.5 (1341.0 to 1487.5)                     | -11.3% (-18.2 to -3.4)                                 |
| Swaziland                          | 1803.2 (1685.6 to 1920.8)                     | -3.6% (-7.1 to -0.1)                                   | 110.7 (95.2 to 126.2)                         | -3.6% (-7.9 to 0.7)                                    | 140.9 (115.9 to 165.9)                        | 8.6% (-12.9 to 31.7)                                   | 87.8 (60.7 to 114.9)                          | -4.9% (-8.8 to -1.0)                                   | 2466.4 (1988.6 to 2944.2)                     | 13.9% (-10.8 to 38.6)                                  |

|                            |                           |                         |                        |                         |                        |                         |                      |                         |                           |                         |
|----------------------------|---------------------------|-------------------------|------------------------|-------------------------|------------------------|-------------------------|----------------------|-------------------------|---------------------------|-------------------------|
|                            | to 1934.4)                | 0.2)                    | 127.2)                 | 0.9)                    | 170.0)                 | 37.6)                   | 120.3)               | 0.7)                    | to 2969.7)                | 45.8)                   |
| Zimbabwe                   | 1756.8 (1636.3 to 1874.2) | -3.3% (-6.6 to 0.3)     | 133.6 (117.1 to 151.6) | 3.1% (-0.7 to 7.8)      | 164.8 (143.1 to 186.9) | 24.6% (5.8 to 46.9)     | 84.1 (58.0 to 114.0) | -4.4% (-9.0 to 0.1)     | 2956.6 (2520.4 to 3387.5) | 36.8% (12.7 to 63.2)    |
| Western Sub-Saharan Africa |                           |                         |                        |                         |                        |                         |                      |                         |                           |                         |
| Benin                      | 1330.3 (1243.4 to 1414.5) | -8.4% (-11.1 to -5.3)   | 89.0 (77.1 to 103.3)   | -9.5% (-13.5 to -5.1)   | 98.7 (84.3 to 114.8)   | -17.8% (-30.3 to -2.8)  | 59.1 (40.3 to 81.8)  | -8.0% (-12.3 to -3.3)   | 1675.6 (1388.5 to 1998.8) | -17.0% (-31.9 to 0.9)   |
| Burkina Faso               | 1519.2 (1430.5 to 1612.9) | -4.3% (-7.3 to -1.2)    | 100.5 (87.5 to 114.4)  | 1.0% (-3.5 to 5.7)      | 135.9 (121.9 to 151.6) | 16.5% (-0.8 to 41.2)    | 68.8 (46.9 to 95.5)  | -3.6% (-8.5 to 1.0)     | 2382.9 (2087.0 to 2707.8) | 14.7% (-4.2 to 44.2)    |
| Cameroon                   | 1433.6 (1352.9 to 1520.6) | -10.4% (-13.4 to -7.3)  | 95.8 (82.9 to 109.6)   | -9.2% (-12.7 to -5.2)   | 101.0 (81.6 to 121.1)  | -10.4% (-27.2 to 9.5)   | 62.5 (42.8 to 85.9)  | -6.8% (-11.7 to -2.1)   | 1745.2 (1359.9 to 2137.2) | -4.3% (-24.1 to 20.0)   |
| Cape Verde                 | 1598.9 (1508.1 to 1700.5) | -7.2% (-10.2 to -4.2)   | 81.8 (70.4 to 94.2)    | -10.1% (-14.2 to -6.1)  | 102.0 (93.9 to 110.2)  | -21.7% (-29.5 to -13.6) | 71.3 (48.5 to 99.1)  | -8.4% (-12.7 to -3.5)   | 1644.9 (1495.1 to 1796.1) | -19.5% (-28.5 to -9.5)  |
| Chad                       | 1678.3 (1576.7 to 1779.9) | 3.0% (-0.5 to 6.1)      | 102.6 (89.0 to 117.9)  | -1.3% (-5.5 to 3.3)     | 124.8 (104.7 to 147.0) | 0.6% (-13.0 to 18.5)    | 76.0 (52.2 to 105.2) | 3.1% (-1.7 to 7.9)      | 2186.9 (1800.3 to 2620.4) | 6.2% (-11.1 to 28.3)    |
| Cote d'Ivoire              | 1603.4 (1502.5 to 1711.6) | -14.5% (-17.2 to -11.5) | 118.4 (103.9 to 135.1) | -17.5% (-21.9 to -13.2) | 148.9 (129.9 to 168.8) | -17.8% (-29.5 to -3.5)  | 69.4 (47.6 to 95.8)  | -12.7% (-16.9 to -8.3)  | 2728.7 (2328.0 to 3158.2) | -16.3% (-29.8 to 0.8)   |
| The Gambia                 | 1646.6 (1551.9 to 1751.4) | -4.5% (-7.9 to -1.3)    | 101.8 (87.7 to 117.3)  | 0.8% (-3.6 to 5.6)      | 170.3 (149.7 to 192.2) | 3.6% (-12.3 to 22.2)    | 74.7 (51.0 to 103.8) | -4.6% (-9.3 to 0.1)     | 3085.9 (2640.8 to 3517.9) | 6.3% (-12.2 to 28.2)    |
| Ghana                      | 1487.4 (1399.3 to 1583.0) | -10.3% (-13.4 to -7.1)  | 107.8 (94.5 to 121.7)  | -7.2% (-11.2 to -3.0)   | 131.6 (117.1 to 147.1) | -1.5% (-16.4 to 15.8)   | 67.4 (46.2 to 93.3)  | -12.3% (-16.6 to -8.0)  | 2243.1 (1964.1 to 2552.3) | -1.8% (-18.6 to 18.3)   |
| Guinea                     | 1478.7 (1390.9 to 1569.7) | 1.1% (-2.0 to 4.3)      | 108.1 (94.6 to 123.2)  | 1.2% (-3.4 to 5.6)      | 157.4 (139.9 to 177.3) | 18.9% (1.6 to 37.9)     | 65.0 (44.4 to 89.8)  | 2.1% (-2.7 to 7.4)      | 2856.6 (2469.6 to 3258.6) | 28.6% (7.9 to 50.8)     |
| Guinea-Bissau              | 1464.5 (1380.8 to 1550.5) | -6.1% (-9.1 to -2.8)    | 95.8 (81.7 to 111.3)   | -6.3% (-10.8 to -1.7)   | 173.8 (151.4 to 198.0) | -13.7% (-27.7 to 2.6)   | 65.9 (45.0 to 90.7)  | -5.7% (-9.9 to 0.9)     | 3323.5 (2849.0 to 3855.9) | -10.9% (-26.9 to 8.3)   |
| Liberia                    | 1802.0 (1694.9 to 1918.2) | -6.7% (-9.8 to -3.3)    | 110.9 (95.6 to 127.5)  | -6.8% (-10.9 to -2.4)   | 138.7 (119.6 to 159.2) | -9.2% (-22.8 to 6.5)    | 81.3 (55.8 to 111.9) | -7.0% (-11.4 to -2.4)   | 2475.7 (2080.7 to 2882.3) | -6.9% (-22.6 to 11.7)   |
| Mali                       | 1234.0 (1158.4 to 1312.1) | -5.1% (-8.3 to -1.7)    | 94.9 (82.0 to 108.3)   | -12.6% (-16.6 to -8.6)  | 114.5 (97.0 to 133.4)  | -24.5% (-34.9 to -13.0) | 53.2 (36.6 to 73.3)  | -4.1% (-9.0 to 1.3)     | 1877.3 (1574.4 to 2220.1) | -26.5% (-38.0 to -13.5) |
| Mauritania                 | 1645.2 (1549.3 to 1755.3) | -2.9% (-6.3 to 0.5)     | 95.9 (83.3 to 111.0)   | -9.8% (-13.9 to -5.0)   | 116.2 (99.4 to 133.9)  | -35.6% (-45.4 to -24.2) | 73.6 (49.8 to 102.5) | -3.0% (-7.7 to 2.1)     | 1939.4 (1633.4 to 2282.1) | -40.0% (-50.6 to -27.9) |
| Niger                      | 1344.9 (1261.0 to 1431.3) | -9.4% (-12.2 to -6.3)   | 92.8 (79.9 to 106.2)   | -10.2% (-14.5 to -5.9)  | 98.2 (76.3 to 120.0)   | -28.8% (-39.2 to -16.7) | 60.7 (41.4 to 84.3)  | -9.2% (-13.5 to -4.4)   | 1679.0 (1245.6 to 2094.8) | -27.8% (-40.0 to -13.2) |
| Nigeria                    | 1414.2 (1333.5 to 1493.8) | -9.5% (-12.4 to -6.7)   | 100.0 (89.0 to 111.1)  | -17.3% (-21.8 to -12.8) | 79.2 (60.2 to 104.7)   | -18.5% (-40.2 to 11.2)  | 58.4 (40.2 to 81.0)  | -10.1% (-14.6 to -5.2)  | 1234.3 (904.6 to 1709.5)  | -18.0% (-41.9 to 16.7)  |
| Sao Tome and Principe      | 1684.9 (1584.5 to 1784.6) | -14.8% (-17.6 to -12.1) | 94.0 (81.0 to 108.9)   | -11.5% (-15.6 to -6.9)  | 121.6 (104.6 to 140.4) | 9.7% (-9.6 to 29.9)     | 75.6 (52.0 to 103.5) | -16.8% (-20.6 to -12.7) | 2066.7 (1772.8 to 2398.3) | 8.6% (-12.3 to 30.9)    |
| Senegal                    | 1615.2 (1509.3 to 1725.1) | -10.6% (-14.1 to -7.5)  | 107.7 (93.4 to 122.7)  | -11.3% (-15.0 to -6.7)  | 119.9 (105.8 to 135.7) | -14.5% (-26.1 to -1.3)  | 73.5 (50.2 to 101.6) | -10.6% (-15.0 to -6.0)  | 2089.3 (1805.7 to 2403.6) | -14.9% (-27.5 to -0.3)  |
| Sierra Leone               | 1786.8 (1681.5 to 1904.1) | -7.8% (-10.9 to -4.5)   | 115.1 (99.3 to 131.9)  | -9.1% (-13.1 to -4.8)   | 161.9 (142.0 to 184.6) | -1.1% (-17.5 to 25.0)   | 80.4 (55.3 to 111.0) | -7.6% (-12.0 to -2.9)   | 2979.3 (2537.2 to 3474.0) | 1.5% (-17.8 to 33.1)    |
| Togo                       | 1524.7 (1437.5 to 1615.7) | -10.5% (-13.4 to -7.5)  | 99.2 (85.9 to 113.9)   | -8.6% (-12.4 to -4.6)   | 135.3 (116.8 to 157.7) | -10.3% (-23.1 to 4.8)   | 68.9 (46.8 to 95.7)  | -10.5% (-14.5 to -6.3)  | 2412.5 (2037.0 to 2831.9) | -5.8% (-20.6 to 12.7)   |
| Andean Latin America       |                           |                         |                        |                         |                        |                         |                      |                         |                           |                         |
| Bolivia                    | 1276.0 (1189.5 to 1364.8) | -9.5% (-12.8 to -6.1)   | 89.8 (78.4 to 102.2)   | -17.8% (-21.7 to -13.4) | 108.8 (92.0 to 128.7)  | -39.0% (-48.9 to -28.0) | 60.7 (41.5 to 83.6)  | -3.8% (-8.6 to 1.5)     | 1755.3 (1451.4 to 2116.9) | -44.7% (-54.9 to -32.8) |
| Ecuador                    | 1314.6 (1227.4 to 1411.3) | -1.3% (-4.5 to 2.1)     | 82.8 (71.9 to 95.4)    | -11.3% (-15.8 to -6.6)  | 66.4 (60.7 to 72.3)    | -39.1% (-44.3 to -33.6) | 64.2 (44.2 to 88.5)  | -0.7% (-5.4 to 4.4)     | 1092.0 (988.1 to 1199.9)  | -40.5% (-46.2 to -34.4) |
| Peru                       | 1187.3 (1099.4 to 1274.4) | -7.3% (-10.7 to -3.9)   | 74.0 (64.4 to 84.9)    | -24.6% (-29.0 to -20.4) | 46.8 (41.3 to 52.8)    | -51.3% (-57.2 to -43.9) | 64.7 (44.5 to 89.5)  | -5.5% (-9.7 to 0.8)     | 767.2 (665.5 to 880.7)    | -51.9% (-58.6 to -43.6) |
| Tropical Latin America     |                           |                         |                        |                         |                        |                         |                      |                         |                           |                         |
| Brazil                     | 1563.7 (1465.6 to 1669.4) | -6.6% (-7.8 to -5.2)    | 78.8 (68.8 to 89.4)    | -29.4% (-31.7 to -27.0) | 80.0 (77.9 to 81.7)    | -52.7% (-53.9 to -51.4) | 76.6 (52.5 to 106.4) | -4.3% (-5.7 to -2.8)    | 1525.8 (1482.2 to 1557.6) | -50.4% (-51.9 to -49.1) |
| Paraguay                   | 1632.7 (1527.4 to 1748.7) | -7.7% (-10.8 to -4.4)   | 83.4 (72.5 to 95.7)    | -12.5% (-16.5 to -8.4)  | 99.7 (86.8 to 114.6)   | -28.1% (-38.2 to -15.6) | 85.4 (58.9 to 118.1) | -8.5% (-12.9 to -4.4)   | 1711.4 (1465.4 to 1998.4) | -24.4% (-36.3 to -9.9)  |
| Central Latin America      |                           |                         |                        |                         |                        |                         |                      |                         |                           |                         |
| Colombia                   | 1418.1 (1327.5 to 1513.1) | -15.9% (-18.7 to -12.6) | 92.4 (81.8 to 103.8)   | -37.9% (-41.4 to -34.2) | 71.2 (64.7 to 77.7)    | -52.4% (-56.9 to -47.7) | 70.3 (48.4 to 96.8)  | -14.4% (-18.4 to -10.3) | 1166.5 (1054.1 to 1289.3) | -55.4% (-60.0 to -50.4) |
| Costa Rica                 | 1493.2 (1395.8 to 1587.6) | -6.8% (-10.0 to -3.6)   | 82.9 (71.6 to 95.7)    | -19.5% (-23.3 to -15.2) | 77.9 (72.4 to 83.8)    | -44.0% (-48.2 to -39.5) | 73.6 (50.4 to 101.7) | -7.5% (-11.8 to -3.2)   | 1315.8 (1224.2 to 1417.9) | -40.0% (-44.2 to -35.0) |
| El Salvador                | 1323.0 (1227.3 to 1422.6) | -0.5% (-4.1 to 3.3)     | 88.0 (76.3 to 100.6)   | -13.6% (-17.8 to -9.0)  | 109.6 (95.2 to 125.6)  | -22.5% (-32.9 to -10.9) | 73.2 (50.7 to 100.8) | 0.6% (-3.9 to 5.7)      | 1871.6 (1604.1 to 2181.7) | -26.7% (-37.5 to -14.1) |
| Guatemala                  | 1355.9 (1264.2 to 1454.2) | -4.9% (-8.2 to -1.7)    | 91.9 (80.1 to 104.7)   | -15.2% (-18.8 to -10.6) | 92.5 (84.5 to 100.4)   | -37.1% (-42.3 to -31.3) | 71.8 (49.1 to 97.7)  | -4.3% (-8.7 to 0.3)     | 1439.9 (1301.1 to 1586.6) | -43.8% (-49.2 to -37.7) |
| Honduras                   | 1561.6 (1456.9 to 1669.4) | -1.7% (-5.3 to 1.9)     | 108.9 (94.8 to 123.0)  | -2.8% (-7.1 to 1.5)     | 152.6 (124.4 to 180.8) | 4.4% (-14.1 to 23.3)    | 81.0 (56.2 to 105.8) | -0.4% (-4.8 to 4.0)     | 2726.4 (2271.5 to 3181.3) | -8.5% (-25.8 to 6.8)    |

|                                  |                           |                         |                        |                         |                        |                         |                       |                         |                           |                         |
|----------------------------------|---------------------------|-------------------------|------------------------|-------------------------|------------------------|-------------------------|-----------------------|-------------------------|---------------------------|-------------------------|
|                                  | to 1673.8)                | 1.9)                    | 123.9)                 | 1.7)                    | 178.1)                 | 24.7)                   | 111.7)                | 4.3)                    | to 3216.8)                | 9.9)                    |
| Mexico                           | 1634.9 (1525.8 to 1746.1) | -6.6% (-7.9 to -5.3)    | 96.6 (84.1 to 110.8)   | -12.6% (-13.9 to -11.4) | 95.9 (92.3 to 98.8)    | -13.8% (-17.0 to -10.4) | 83.0 (57.5 to 113.9)  | -5.6% (-6.8 to -4.6)    | 1531.4 (1482.5 to 1574.3) | -14.9% (-17.8 to -11.8) |
| Nicaragua                        | 1501.1 (1402.3 to 1601.2) | -3.2% (-6.4 to -0.1)    | 90.2 (78.1 to 103.7)   | -11.8% (-15.5 to -8.1)  | 81.1 (73.8 to 88.9)    | -28.4% (-35.7 to -20.4) | 77.2 (53.2 to 106.4)  | -2.8% (-7.1 to 1.5)     | 1292.1 (1161.7 to 1441.9) | -29.6% (-37.8 to -20.4) |
| Panama                           | 1364.9 (1275.3 to 1464.1) | -0.7% (-4.3 to 3.1)     | 77.4 (66.7 to 89.3)    | -15.1% (-19.1 to -11.7) | 61.7 (57.8 to 65.9)    | -51.2% (-54.4 to -47.6) | 71.2 (49.2 to 98.3)   | -2.0% (-6.6 to 3.0)     | 986.9 (924.8 to 1050.7)   | -48.3% (-51.9 to -44.5) |
| Venezuela                        | 1549.9 (1445.3 to 1656.9) | -11.0% (-14.3 to -7.6)  | 113.4 (100.6 to 127.1) | -25.6% (-29.1 to -21.9) | 121.0 (105.8 to 137.9) | -32.5% (-41.0 to -22.5) | 76.1 (52.3 to 105.1)  | -7.7% (-11.7 to -3.4)   | 2147.5 (1859.3 to 2467.8) | -33.4% (-42.8 to -22.6) |
| Southern Latin America           |                           |                         |                        |                         |                        |                         |                       |                         |                           |                         |
| Argentina                        | 1194.5 (1112.8 to 1281.0) | -15.1% (-18.9 to -11.2) | 143.8 (128.7 to 159.2) | -33.7% (-37.8 to -29.3) | 97.2 (88.9 to 106.4)   | -46.8% (-51.4 to -41.8) | 38.6 (26.8 to 52.8)   | -21.9% (-26.5 to -17.0) | 1583.9 (1422.5 to 1757.9) | -47.9% (-53.0 to -42.3) |
| Chile                            | 1341.3 (1252.1 to 1435.2) | -7.3% (-11.6 to -2.7)   | 132.3 (115.8 to 151.4) | -27.0% (-31.0 to -22.6) | 52.5 (47.7 to 57.9)    | -60.9% (-64.5 to -56.7) | 43.1 (30.0 to 59.0)   | -22.7% (-27.0 to -18.4) | 867.3 (779.3 to 968.1)    | -57.3% (-61.6 to -52.3) |
| Uruguay                          | 1217.4 (1128.5 to 1307.1) | -13.2% (-17.1 to -9.0)  | 130.7 (113.1 to 150.0) | -27.2% (-31.5 to -22.6) | 68.2 (62.1 to 74.5)    | -56.8% (-60.5 to -52.6) | 41.3 (28.7 to 56.4)   | -27.7% (-31.5 to -23.7) | 1123.1 (1014.6 to 1244.8) | -57.6% (-61.7 to -53.0) |
| Caribbean                        |                           |                         |                        |                         |                        |                         |                       |                         |                           |                         |
| Antigua and Barbuda              | 1440.4 (1353.1 to 1533.5) | -13.5% (-16.3 to -10.8) | 94.7 (81.7 to 110.5)   | -9.9% (-13.6 to -5.8)   | 75.6 (70.6 to 80.8)    | -41.9% (-46.3 to -37.0) | 65.2 (44.7 to 90.5)   | -16.4% (-20.1 to -12.5) | 1227.4 (1147.3 to 1316.5) | -47.6% (-51.5 to -42.9) |
| The Bahamas                      | 1638.4 (1546.3 to 1738.3) | -4.9% (-7.6 to -1.9)    | 107.0 (92.7 to 123.8)  | -2.2% (-6.7 to 3.0)     | 90.0 (82.9 to 97.8)    | -33.2% (-38.7 to -27.8) | 70.6 (47.9 to 98.0)   | -6.9% (-10.7 to -2.4)   | 1684.6 (1547.3 to 1838.6) | -35.3% (-41.1 to -28.9) |
| Barbados                         | 1567.8 (1473.6 to 1665.2) | -7.5% (-10.4 to -4.4)   | 100.1 (86.4 to 116.3)  | -6.1% (-10.3 to -1.9)   | 62.9 (57.9 to 68.1)    | -53.4% (-56.9 to -49.4) | 72.7 (49.7 to 100.7)  | -9.7% (-13.5 to -5.9)   | 1002.1 (919.2 to 1097.2)  | -53.6% (-57.6 to -49.1) |
| Belize                           | 1777.2 (1671.1 to 1891.8) | -10.6% (-13.7 to -7.4)  | 119.6 (102.9 to 139.1) | -7.9% (-12.3 to -4.0)   | 79.3 (75.0 to 83.7)    | -49.2% (-52.7 to -45.3) | 81.3 (55.9 to 112.3)  | -13.5% (-17.3 to -9.7)  | 1421.7 (1342.8 to 1507.7) | -46.2% (-50.4 to -41.7) |
| Bermuda                          | 1614.6 (1513.1 to 1726.2) | -12.9% (-15.9 to -9.8)  | 92.5 (79.6 to 107.2)   | -13.2% (-17.2 to -8.2)  | 74.1 (69.4 to 79.3)    | -65.5% (-68.2 to -62.6) | 80.2 (55.5 to 111.2)  | -16.6% (-20.1 to -12.7) | 1131.4 (1056.1 to 1209.0) | -69.5% (-72.1 to -66.7) |
| Cuba                             | 1465.8 (1360.5 to 1571.1) | -17.0% (-20.0 to -13.6) | 115.3 (101.5 to 129.7) | -43.2% (-47.5 to -39.1) | 107.2 (97.7 to 117.7)  | -48.4% (-53.0 to -43.2) | 74.0 (51.2 to 101.4)  | -16.0% (-19.8 to -11.4) | 1746.5 (1575.3 to 1939.3) | -47.7% (-52.7 to -41.9) |
| Dominica                         | 1575.5 (1486.9 to 1670.7) | -7.9% (-10.7 to -4.7)   | 107.0 (92.1 to 123.3)  | -4.1% (-8.5 to 0.0)     | 77.9 (72.7 to 83.8)    | -41.7% (-45.7 to -36.9) | 67.8 (46.6 to 94.3)   | -11.5% (-15.4 to -7.8)  | 1280.9 (1190.1 to 1381.4) | -41.2% (-45.6 to -36.0) |
| Dominican Republic               | 1528.5 (1424.7 to 1635.9) | -4.8% (-8.3 to -1.2)    | 124.9 (110.2 to 141.3) | 1.8% (-3.0 to 6.5)      | 151.3 (133.7 to 169.6) | 12.0% (-3.2 to 29.3)    | 75.4 (51.9 to 103.9)  | -7.4% (-11.4 to -3.3)   | 2836.2 (2456.1 to 3238.0) | 14.0% (-3.6 to 32.7)    |
| Grenada                          | 1723.6 (1621.6 to 1831.7) | -2.4% (-5.8 to 0.9)     | 115.8 (99.2 to 134.4)  | -1.7% (-6.2 to 2.7)     | 103.9 (97.9 to 110.7)  | -48.3% (-51.6 to -44.6) | 79.6 (54.2 to 110.6)  | -5.0% (-9.1 to 0.8)     | 1879.5 (1772.9 to 1994.8) | -47.7% (-51.1 to -44.0) |
| Guyana                           | 1794.4 (1683.5 to 1908.2) | -11.4% (-14.4 to -8.5)  | 122.9 (106.6 to 142.2) | -11.4% (-15.8 to -7.6)  | 166.6 (151.4 to 183.1) | -24.0% (-31.0 to -16.3) | 80.9 (55.6 to 112.1)  | -14.4% (-18.0 to -10.8) | 3219.6 (2889.4 to 3582.4) | -24.4% (-31.9 to -15.5) |
| Haiti                            | 1990.9 (1874.4 to 2116.7) | -6.2% (-9.6 to -2.6)    | 149.9 (132.1 to 170.6) | -19.1% (-23.4 to -14.4) | 185.4 (154.7 to 217.7) | -30.1% (-41.2 to -18.0) | 87.5 (60.1 to 120.3)  | -4.1% (-8.1 to 0.2)     | 3364.5 (2754.4 to 4044.3) | -34.6% (-46.0 to -21.9) |
| Jamaica                          | 1747.9 (1646.6 to 1858.0) | 1.7% (-1.5 to 5.0)      | 115.7 (99.5 to 133.5)  | -1.3% (-6.1 to 3.4)     | 70.7 (62.0 to 80.2)    | -25.3% (-37.1 to -13.1) | 77.2 (52.8 to 106.2)  | 0.4% (-4.2 to 5.2)      | 1209.6 (1034.9 to 1396.3) | -18.4% (-33.0 to -1.8)  |
| Puerto Rico                      | 1732.5 (1627.2 to 1845.2) | -5.6% (-8.7 to -2.1)    | 100.7 (87.5 to 116.4)  | -24.5% (-29.0 to -19.7) | 57.7 (54.5 to 61.4)    | -62.6% (-64.7 to -60.3) | 81.0 (55.9 to 112.4)  | -4.8% (-9.1 to -0.5)    | 1006.4 (946.1 to 1075.2)  | -61.4% (-63.8 to -58.8) |
| Saint Lucia                      | 1622.2 (1528.6 to 1724.5) | -4.0% (-6.9 to -1.0)    | 109.1 (94.3 to 126.6)  | -3.1% (-7.3 to 1.1)     | 66.5 (61.4 to 71.4)    | -57.4% (-60.3 to -54.2) | 71.3 (49.1 to 98.9)   | -6.6% (-10.9 to -2.5)   | 1128.5 (1045.4 to 1214.7) | -56.3% (-59.7 to -52.8) |
| Saint Vincent and the Grenadines | 1652.2 (1547.6 to 1763.0) | -10.9% (-13.8 to -8.0)  | 113.3 (97.1 to 130.9)  | -7.0% (-11.3 to -2.6)   | 113.2 (106.6 to 120.0) | -35.6% (-39.9 to -31.5) | 76.0 (52.0 to 104.6)  | -14.0% (-17.8 to -10.0) | 1966.2 (1844.1 to 2092.7) | -32.8% (-37.6 to -27.8) |
| Suriname                         | 1925.2 (1807.8 to 2046.2) | 3.0% (-0.2 to 6.4)      | 124.8 (107.0 to 143.9) | 0.3% (-4.1 to 5.1)      | 107.8 (97.3 to 117.3)  | -44.5% (-50.2 to -38.9) | 89.4 (61.3 to 124.0)  | 1.4% (-2.7 to 6.0)      | 2049.9 (1830.8 to 2263.7) | -41.9% (-49.0 to -34.9) |
| Trinidad and Tobago              | 2055.8 (1936.5 to 2194.1) | -10.7% (-13.6 to -7.6)  | 128.1 (110.2 to 148.6) | -16.7% (-20.6 to -12.7) | 122.1 (103.4 to 142.9) | -44.0% (-52.7 to -34.1) | 96.4 (66.0 to 133.9)  | -13.5% (-17.3 to -9.8)  | 2279.2 (1898.4 to 2715.4) | -44.9% (-54.4 to -34.3) |
| Virgin Islands, U.S.             | 1427.8 (1333.5 to 1523.7) | -7.4% (-10.6 to -4.2)   | 92.6 (79.0 to 106.9)   | -8.3% (-12.6 to -3.7)   | 154.6 (133.4 to 171.1) | -26.7% (-37.6 to -17.6) | 69.9 (47.9 to 96.4)   | -8.5% (-12.6 to -4.3)   | 2633.3 (2221.6 to 2946.8) | -26.6% (-38.6 to -16.8) |
| Central Europe                   |                           |                         |                        |                         |                        |                         |                       |                         |                           |                         |
| Albania                          | 1998.6 (1864.3 to 2143.5) | -15.2% (-18.4 to -11.8) | 142.9 (124.2 to 163.6) | -17.2% (-21.1 to -12.5) | 146.3 (124.6 to 171.3) | -2.1% (-16.8 to 14.8)   | 95.6 (66.2 to 131.9)  | -19.8% (-23.2 to -16.2) | 2263.9 (1892.5 to 2692.2) | -9.1% (-24.1 to 7.9)    |
| Bosnia and Herzegovina           | 2404.2 (2240.1 to 2574.0) | -12.9% (-16.2 to -9.5)  | 176.1 (154.6 to 198.7) | -29.3% (-33.1 to -24.9) | 165.0 (153.5 to 175.4) | -32.0% (-38.3 to -26.7) | 113.0 (77.8 to 154.4) | -18.5% (-22.3 to -14.8) | 2359.4 (2181.3 to 2516.5) | -39.6% (-46.0 to -34.5) |
| Bulgaria                         | 2600.3 (2439.3 to 2770.3) | -7.1% (-10.2 to -3.5)   | 226.0 (206.5 to 247.0) | -37.2% (-41.1 to -33.3) | 220.4 (210.1 to 231.8) | -31.1% (-35.0 to -26.3) | 114.4 (79.1 to 156.3) | -5.1% (-9.0 to -1.0)    | 3604.1 (3403.9 to 3813.8) | -24.4% (-29.0 to -18.8) |
| Croatia                          | 2543.9 (2401.1 to 2693.6) | -17.5% (-20.6 to -14.0) | 165.1 (149.6 to 182.0) | -35.5% (-39.3 to -31.5) | 142.4 (134.8 to 152.1) | -43.1% (-46.3 to -39.6) | 110.7 (76.1 to 152.1) | -23.2% (-26.7 to -19.7) | 1907.6 (1799.8 to 2029.2) | -49.3% (-52.4 to -45.8) |
| Czech Republic                   | 2650.6 (2466.3 to 2838.8) | -24.1% (-27.4 to -20.8) | 214.9 (195.1 to 236.2) | -44.0% (-47.7 to -39.7) | 147.1 (140.0 to 155.2) | -54.6% (-57.2 to -51.5) | 124.8 (86.8 to 169.4) | -22.6% (-26.3 to -18.7) | 1963.6 (1849.5 to 2087.0) | -63.0% (-65.3 to -60.2) |
| Hungary                          | 2837.4 (2664.8 to 3010.0) | -17.1% (-20.5 to -13.7) | 212.1 (192.9 to 231.3) | -32.7% (-36.6 to -28.8) | 165.4 (157.8 to 173.0) | -38.7% (-41.8 to -35.6) | 122.7 (84.7 to 160.7) | -20.0% (-23.2 to -16.8) | 2498.1 (2373.3 to 2622.9) | -46.8% (-49.7 to -43.9) |

|                              |                           |                         |                        |                         |                        |                         |                       |                         |                           |                         |
|------------------------------|---------------------------|-------------------------|------------------------|-------------------------|------------------------|-------------------------|-----------------------|-------------------------|---------------------------|-------------------------|
|                              | to 3027.9)                | -12.8)                  | 233.7)                 | -28.3)                  | 174.3)                 | -35.4)                  | 167.3)                | -16.8)                  | to 2645.5)                | -43.7)                  |
| Macedonia                    | 2270.4 (2126.5 to 2419.3) | -16.5% (-19.7 to -13.1) | 144.9 (125.4 to 165.8) | -25.8% (-29.9 to -22.2) | 125.9 (117.6 to 134.4) | -37.4% (-41.5 to -33.0) | 99.1 (68.5 to 136.2)  | -21.7% (-24.9 to -18.5) | 2185.5 (2017.8 to 2366.2) | -36.1% (-40.6 to -31.1) |
| Montenegro                   | 2506.6 (2331.4 to 2688.6) | -14.2% (-17.6 to -10.5) | 147.9 (127.7 to 169.3) | -16.9% (-21.3 to -12.7) | 149.6 (139.1 to 161.6) | -12.4% (-20.4 to -4.4)  | 122.0 (85.4 to 166.0) | -19.3% (-22.6 to -15.9) | 2393.1 (2195.1 to 2625.5) | -15.0% (-23.2 to -6.0)  |
| Poland                       | 2409.4 (2257.1 to 2573.5) | -22.1% (-24.8 to -19.0) | 194.7 (178.7 to 211.4) | -47.7% (-50.8 to -44.3) | 130.8 (125.0 to 136.9) | -58.3% (-60.2 to -56.3) | 109.2 (76.2 to 148.5) | -22.8% (-25.8 to -19.5) | 1939.0 (1840.0 to 2040.4) | -63.3% (-65.3 to -61.2) |
| Romania                      | 2551.9 (2385.8 to 2750.1) | -15.1% (-19.2 to -10.0) | 176.4 (163.0 to 191.6) | -47.0% (-50.0 to -43.7) | 174.1 (166.2 to 184.0) | -41.9% (-44.7 to -38.8) | 109.1 (74.3 to 151.6) | -15.4% (-18.8 to -11.5) | 2624.2 (2487.7 to 2777.4) | -41.0% (-44.2 to -37.7) |
| Serbia                       | 2645.0 (2503.5 to 2799.0) | -9.6% (-13.0 to -6.1)   | 241.9 (222.4 to 265.1) | -19.9% (-24.0 to -15.2) | 208.2 (196.9 to 222.5) | -16.8% (-22.1 to -11.3) | 107.7 (74.3 to 147.9) | -15.2% (-19.0 to -11.3) | 2697.8 (2526.0 to 2897.1) | -32.0% (-36.5 to -27.5) |
| Slovakia                     | 2411.4 (2252.5 to 2583.5) | -26.4% (-29.6 to -22.8) | 189.9 (172.4 to 209.3) | -44.1% (-47.5 to -40.7) | 193.5 (183.2 to 205.9) | -45.4% (-48.5 to -41.3) | 124.8 (87.5 to 170.2) | -24.6% (-28.2 to -21.1) | 2628.8 (2468.3 to 2854.8) | -55.3% (-58.5 to -50.9) |
| Slovenia                     | 2319.7 (2182.5 to 2465.7) | -20.6% (-23.5 to -17.8) | 132.2 (116.8 to 150.6) | -27.3% (-30.8 to -23.4) | 69.6 (64.4 to 78.9)    | -52.4% (-55.7 to -48.6) | 101.1 (70.2 to 139.8) | -23.7% (-27.0 to -20.4) | 931.1 (858.8 to 1021.2)   | -58.8% (-61.9 to -55.5) |
| Eastern Europe               |                           |                         |                        |                         |                        |                         |                       |                         |                           |                         |
| Belarus                      | 2776.1 (2601.9 to 2963.6) | -4.9% (-8.7 to -0.9)    | 361.2 (334.3 to 390.5) | -10.5% (-14.6 to -5.9)  | 318.0 (303.2 to 334.0) | 5.2% (0.4 to 10.1)      | 107.1 (74.8 to 146.1) | -5.4% (-9.5 to -1.1)    | 5018.1 (4731.1 to 5318.3) | 1.6% (-3.5 to 6.8)      |
| Estonia                      | 2624.6 (2469.7 to 2792.3) | -9.1% (-13.0 to -5.0)   | 221.4 (193.2 to 251.1) | -39.1% (-44.4 to -32.8) | 141.1 (121.8 to 184.3) | -60.1% (-65.6 to -47.9) | 96.2 (66.4 to 132.1)  | -9.0% (-13.2 to -5.0)   | 1927.7 (1638.8 to 2521.7) | -65.4% (-70.4 to -55.3) |
| Latvia                       | 2568.7 (2415.2 to 2751.7) | -7.5% (-11.5 to -2.6)   | 217.7 (195.0 to 243.7) | -36.3% (-40.2 to -32.5) | 198.0 (180.3 to 220.3) | -39.4% (-44.9 to -32.3) | 95.2 (65.2 to 132.5)  | -9.7% (-13.7 to -5.7)   | 3092.1 (2777.7 to 3484.0) | -42.6% (-48.5 to -35.0) |
| Lithuania                    | 2675.4 (2485.5 to 2878.5) | -4.4% (-8.5 to 0.7)     | 267.2 (242.4 to 294.8) | -30.9% (-35.0 to -26.8) | 233.2 (221.4 to 245.8) | -31.9% (-35.4 to -28.2) | 110.6 (77.7 to 150.9) | -3.9% (-7.8 to 0.7)     | 3402.0 (3199.4 to 3616.2) | -35.2% (-38.9 to -31.3) |
| Moldova                      | 2533.4 (2355.5 to 2743.6) | -7.2% (-11.5 to -1.4)   | 279.9 (250.7 to 311.5) | -38.8% (-42.9 to -34.2) | 267.9 (258.2 to 286.6) | -30.6% (-33.2 to -25.2) | 98.7 (69.0 to 135.7)  | -1.3% (-5.6 to 2.8)     | 4311.5 (4139.7 to 4596.5) | -24.5% (-27.6 to -18.4) |
| Russian Federation           | 2638.3 (2461.9 to 2825.3) | -3.6% (-5.2 to -1.9)    | 244.2 (215.5 to 275.7) | -19.9% (-22.6 to -17.2) | 240.9 (237.6 to 248.1) | -20.7% (-22.3 to -17.9) | 105.5 (72.9 to 145.1) | -1.5% (-2.3 to 0.6)     | 4050.5 (3987.4 to 4224.4) | -20.1% (-22.0 to -15.7) |
| Ukraine                      | 2669.1 (2476.8 to 2877.0) | -3.5% (-6.7 to 0.1)     | 274.2 (242.9 to 310.1) | -14.8% (-19.3 to -10.4) | 386.1 (371.4 to 402.1) | 17.2% (12.5 to 22.4)    | 115.4 (80.4 to 157.4) | 0.0% (-4.2 to 4.2)      | 6284.9 (5989.3 to 6574.8) | 22.2% (16.5 to 28.3)    |
| North Africa and Middle East |                           |                         |                        |                         |                        |                         |                       |                         |                           |                         |
| Afghanistan                  | 3439.4 (3132.6 to 3751.5) | 5.3% (-2.2 to 13.9)     | 382.1 (346.1 to 420.0) | -26.0% (-30.2 to -21.1) | 360.0 (321.9 to 405.1) | -22.2% (-34.2 to 11.5)  | 106.7 (75.3 to 145.1) | 2.0% (-2.4 to 6.4)      | 7550.8 (6539.0 to 8679.7) | -22.0% (-36.4 to 28.2)  |
| Algeria                      | 2393.0 (2246.5 to 2570.4) | -3.6% (-7.7 to 1.2)     | 275.2 (249.7 to 303.0) | -18.1% (-22.0 to -14.1) | 172.4 (159.0 to 189.3) | -35.9% (-40.8 to -30.8) | 86.2 (59.4 to 117.1)  | -5.4% (-10.0 to -1.0)   | 2721.8 (2486.1 to 3023.0) | -42.3% (-47.0 to -37.3) |
| Bahrain                      | 2629.6 (2449.2 to 2815.7) | -6.2% (-9.9 to -2.2)    | 250.2 (217.8 to 285.8) | -12.7% (-16.8 to -8.4)  | 99.6 (91.3 to 108.0)   | -74.1% (-76.5 to -71.6) | 98.4 (68.8 to 133.1)  | -11.7% (-15.6 to -7.9)  | 1686.1 (1538.9 to 1838.8) | -75.8% (-78.3 to -73.3) |
| Egypt                        | 3000.3 (2814.9 to 3225.3) | -4.9% (-8.2 to 0.2)     | 421.0 (397.1 to 446.5) | -13.5% (-16.5 to -10.1) | 350.7 (313.6 to 388.5) | -8.8% (-17.7 to 0.9)    | 101.7 (70.8 to 137.3) | -6.4% (-10.3 to -2.5)   | 6520.7 (5799.1 to 7282.0) | -9.7% (-19.0 to 1.0)    |
| Iran                         | 1876.5 (1735.4 to 2040.2) | -5.7% (-7.7 to -3.6)    | 158.8 (138.9 to 180.3) | -14.9% (-16.6 to -12.9) | 159.5 (155.9 to 169.3) | -38.3% (-40.9 to -33.6) | 80.7 (55.8 to 109.2)  | -6.5% (-7.8 to -5.1)    | 2476.0 (2416.4 to 2628.1) | -45.6% (-48.1 to -41.4) |
| Iraq                         | 3395.4 (3099.3 to 3716.8) | 3.3% (-4.1 to 11.7)     | 280.9 (250.0 to 314.9) | -37.5% (-41.8 to -32.9) | 129.7 (122.1 to 138.4) | -64.1% (-68.2 to -59.3) | 115.5 (81.2 to 157.7) | -1.0% (-5.1 to 3.4)     | 2276.5 (2134.0 to 2439.6) | -66.1% (-70.6 to -60.8) |
| Jordan                       | 2767.6 (2599.9 to 2961.1) | -1.7% (-5.3 to 2.9)     | 263.9 (228.5 to 299.9) | -8.3% (-12.8 to -3.9)   | 104.1 (93.4 to 117.6)  | -43.9% (-52.3 to -33.7) | 91.2 (62.4 to 125.9)  | -6.6% (-10.6 to -2.5)   | 1748.7 (1550.8 to 1994.5) | -54.1% (-61.7 to -44.7) |
| Kuwait                       | 2777.3 (2606.5 to 2954.5) | -5.4% (-9.1 to -1.7)    | 235.0 (205.0 to 269.2) | -5.5% (-9.6 to -1.1)    | 81.0 (75.3 to 87.1)    | -51.0% (-54.7 to -46.9) | 94.7 (65.7 to 130.1)  | -9.4% (-13.7 to -5.4)   | 1673.3 (1547.6 to 1804.1) | -49.6% (-53.7 to -45.4) |
| Lebanon                      | 2498.7 (2334.3 to 2669.4) | -1.3% (-5.1 to 2.5)     | 259.7 (229.2 to 289.8) | -15.8% (-20.1 to -12.0) | 192.2 (180.1 to 206.0) | -35.5% (-41.1 to -28.1) | 89.8 (62.2 to 122.6)  | -5.9% (-10.0 to -1.9)   | 3190.2 (2991.4 to 3440.0) | -41.2% (-47.2 to -33.4) |
| Libya                        | 2697.8 (2527.2 to 2889.5) | 14.8% (10.3 to 20.0)    | 289.3 (255.9 to 327.4) | 7.9% (3.3 to 12.4)      | 234.2 (205.6 to 263.4) | 1.0% (-13.8 to 19.0)    | 100.3 (69.8 to 136.6) | 21.6% (16.1 to 27.3)    | 4303.8 (3717.8 to 4897.8) | 3.4% (-13.5 to 25.2)    |
| Morocco                      | 2952.1 (2731.7 to 3289.3) | -4.7% (-10.0 to 3.8)    | 353.3 (326.2 to 382.3) | -17.4% (-21.1 to -13.6) | 276.0 (237.6 to 318.4) | -19.1% (-30.9 to -6.1)  | 108.8 (75.3 to 148.5) | -6.9% (-10.8 to -2.9)   | 4816.5 (4078.2 to 5604.1) | -26.1% (-37.9 to -13.3) |
| Palestine                    | 2561.0 (2391.6 to 2758.0) | 4.9% (0.4 to 10.0)      | 272.0 (236.8 to 309.9) | -2.3% (-7.1 to 2.1)     | 153.0 (142.7 to 164.4) | -35.8% (-44.4 to -25.5) | 97.3 (67.6 to 132.1)  | 3.3% (-1.1 to 7.7)      | 2697.1 (2511.0 to 2897.0) | -40.9% (-49.5 to -30.3) |
| Oman                         | 2889.2 (2694.3 to 3095.8) | 15.7% (10.9 to 20.7)    | 270.8 (237.1 to 310.5) | -0.7% (-5.3 to 4.1)     | 183.5 (159.1 to 207.8) | -38.0% (-48.7 to -24.3) | 118.9 (82.7 to 161.0) | 32.2% (25.7 to 39.1)    | 3324.1 (2810.7 to 3867.7) | -43.3% (-54.3 to -28.7) |
| Qatar                        | 3078.7 (2847.9 to 3322.6) | -8.0% (-12.6 to -3.3)   | 360.7 (312.5 to 411.5) | -9.4% (-14.0 to -4.7)   | 122.9 (106.5 to 141.0) | -63.8% (-69.4 to -57.0) | 99.7 (69.4 to 135.6)  | -7.7% (-12.1 to -2.7)   | 1828.4 (1553.2 to 2132.9) | -67.2% (-73.2 to -59.9) |
| Saudi Arabia                 | 2909.2 (2718.7 to 3104.4) | 24.0% (19.1 to 29.5)    | 274.8 (245.3 to 306.7) | 7.6% (2.8 to 12.6)      | 167.7 (154.9 to 184.4) | 1.0% (-17.5 to 22.6)    | 113.7 (79.1 to 154.4) | 23.1% (17.5 to 29.3)    | 2969.2 (2677.2 to 3315.5) | 0.6% (-19.8 to 25.0)    |
| Sudan                        | 2434.3 (2263.2 to 2633.4) | -1.4% (-6.2 to 5.3)     | 316.2 (287.6 to 345.1) | -22.5% (-26.5 to -18.4) | 263.1 (215.9 to 312.7) | -30.5% (-41.7 to -17.6) | 87.9 (61.2 to 118.7)  | 5.8% (1.2 to 11.0)      | 4915.8 (3972.4 to 5972.7) | -35.0% (-47.2 to -20.3) |
| Syria                        | 2607.1 (2415.8 to 2816.4) | 0.1% (-4.5 to 5.4)      | 334.1 (302.7 to 367.2) | -17.9% (-21.5 to -13.9) | 284.5 (251.6 to 323.0) | -23.7% (-34.2 to -11.2) | 109.6 (77.2 to 149.9) | 7.4% (2.4 to 12.7)      | 5171.8 (4464.4 to 5985.3) | -28.2% (-39.3 to -14.3) |

|                      |                           |                         |                        |                         |                        |                         |                       |                         |                           |                         |
|----------------------|---------------------------|-------------------------|------------------------|-------------------------|------------------------|-------------------------|-----------------------|-------------------------|---------------------------|-------------------------|
| Tunisia              | 2401.2 (2245.4 to 2583.2) | -3.2% (-7.2 to 1.2)     | 289.9 (261.6 to 320.4) | -17.2% (-21.1 to -13.3) | 205.1 (172.2 to 240.0) | -27.6% (-40.1 to -14.4) | 85.2 (59.1 to 116.1)  | -5.3% (-9.2 to 0.9)     | 3013.8 (2474.1 to 3612.6) | -29.1% (-42.7 to -13.1) |
| Turkey               | 2228.5 (2105.3 to 2371.1) | -20.8% (-24.0 to -17.1) | 216.2 (195.0 to 238.2) | -35.2% (-39.2 to -31.0) | 98.3 (90.1 to 106.6)   | -56.5% (-60.7 to -52.4) | 76.7 (53.7 to 104.9)  | -26.9% (-30.3 to -23.2) | 1730.1 (1572.0 to 1886.4) | -62.3% (-66.2 to -58.0) |
| United Arab Emirates | 2561.9 (2408.4 to 2735.2) | 12.9% (8.5 to 17.6)     | 266.2 (232.4 to 303.7) | 8.6% (3.2 to 13.7)      | 179.5 (149.2 to 212.8) | -16.8% (-33.3 to 3.3)   | 84.6 (58.1 to 116.0)  | 14.0% (8.5 to 19.9)     | 3187.1 (2580.0 to 3852.3) | -16.8% (-35.7 to 6.0)   |
| Yemen                | 2423.5 (2265.6 to 2615.4) | -6.7% (-10.7 to 1.3)    | 324.4 (294.0 to 356.9) | -16.8% (-20.6 to -12.7) | 300.4 (243.9 to 367.7) | -22.6% (-38.9 to 4.8)   | 84.5 (59.0 to 113.3)  | -0.8% (-5.4 to 3.6)     | 5743.6 (4517.5 to 7298.2) | -28.5% (-46.2 to 4.8)   |
| Central Asia         |                           |                         |                        |                         |                        |                         |                       |                         |                           |                         |
| Armenia              | 2201.2 (2025.8 to 2382.3) | -6.6% (-11.3 to -1.5)   | 148.6 (131.5 to 167.0) | -34.7% (-38.6 to -30.8) | 236.6 (228.7 to 248.2) | -25.5% (-28.8 to -22.1) | 115.4 (80.0 to 157.1) | -6.0% (-10.0 to -2.0)   | 3608.0 (3488.6 to 3745.4) | -28.5% (-31.7 to -25.0) |
| Azerbaijan           | 2270.4 (2106.3 to 2447.7) | -10.1% (-13.6 to -5.8)  | 263.2 (241.1 to 285.6) | -11.3% (-15.4 to -7.1)  | 381.8 (358.7 to 406.2) | 23.0% (12.8 to 34.2)    | 112.2 (78.8 to 153.6) | -7.6% (-11.5 to -3.5)   | 6089.6 (5684.4 to 6536.8) | 6.9% (-1.8 to 16.7)     |
| Georgia              | 2293.8 (2129.8 to 2483.0) | -2.9% (-7.9 to 3.1)     | 174.2 (157.2 to 192.8) | -39.0% (-43.0 to -34.8) | 249.5 (238.4 to 267.0) | -30.1% (-33.9 to -22.8) | 115.4 (79.0 to 158.3) | 2.5% (-2.1 to 7.2)      | 3982.8 (3808.0 to 4190.7) | -34.3% (-38.3 to -28.7) |
| Kazakhstan           | 2070.1 (1924.4 to 2235.9) | -20.4% (-23.8 to -16.6) | 217.3 (199.5 to 237.1) | -33.4% (-37.2 to -29.1) | 275.2 (263.9 to 287.2) | -1.2% (-5.6 to 3.8)     | 99.0 (68.8 to 134.6)  | -13.7% (-17.2 to -9.5)  | 4319.5 (4090.7 to 4632.4) | -10.7% (-15.4 to -3.5)  |
| Kyrgyzstan           | 1679.0 (1553.9 to 1820.7) | -10.0% (-13.7 to -5.6)  | 157.1 (139.5 to 177.1) | -5.2% (-10.2 to 0.1)    | 293.1 (284.9 to 302.6) | 14.6% (9.6 to 19.9)     | 90.2 (62.2 to 123.8)  | -7.1% (-11.4 to -2.2)   | 4628.7 (4454.9 to 4828.0) | 4.6% (-0.7 to 10.1)     |
| Mongolia             | 2165.3 (2003.1 to 2345.9) | -0.2% (-5.2 to 4.9)     | 118.7 (103.6 to 134.7) | -36.9% (-40.8 to -32.7) | 248.2 (228.6 to 269.2) | -33.5% (-39.0 to -27.5) | 112.7 (77.4 to 153.3) | 3.2% (-1.3 to 7.9)      | 4112.5 (3748.1 to 4504.3) | -33.1% (-40.0 to -25.8) |
| Tajikistan           | 1822.7 (1688.1 to 1967.7) | -12.0% (-15.5 to -8.1)  | 145.7 (128.4 to 164.2) | -12.0% (-16.4 to -7.6)  | 268.1 (249.1 to 289.2) | 18.5% (9.3 to 29.6)     | 91.0 (62.3 to 124.0)  | -13.3% (-17.0 to -9.1)  | 4758.9 (4383.5 to 5176.8) | 20.3% (10.2 to 32.0)    |
| Turkmenistan         | 2186.1 (2011.3 to 2370.6) | -5.0% (-10.0 to 0.7)    | 169.4 (149.8 to 191.5) | -31.3% (-35.6 to -26.8) | 339.3 (319.8 to 359.7) | -10.5% (-15.8 to -4.8)  | 110.5 (76.7 to 150.9) | -1.2% (-5.1 to 3.5)     | 5981.2 (5613.3 to 6369.9) | -10.1% (-16.1 to -3.4)  |
| Uzbekistan           | 2332.4 (2139.4 to 2524.1) | 10.7% (5.7 to 16.0)     | 476.4 (453.0 to 503.9) | 53.5% (46.9 to 60.1)    | 534.2 (488.1 to 580.0) | 77.2% (61.1 to 95.1)    | 111.4 (77.3 to 151.4) | 9.4% (4.3 to 14.6)      | 8234.7 (7483.7 to 9011.3) | 60.8% (45.2 to 78.5)    |
| South Asia           |                           |                         |                        |                         |                        |                         |                       |                         |                           |                         |
| Bangladesh           | 1906.8 (1789.3 to 2024.7) | 13.6% (9.5 to 17.4)     | 144.0 (130.5 to 158.0) | 36.8% (28.2 to 46.0)    | 117.4 (105.8 to 129.8) | 48.7% (23.5 to 78.0)    | 84.4 (57.8 to 116.5)  | 3.6% (-1.1 to 8.2)      | 2368.7 (2113.1 to 2641.4) | 64.1% (37.1 to 96.0)    |
| Bhutan               | 1557.9 (1460.2 to 1656.1) | -9.5% (-12.6 to -6.4)   | 90.9 (78.0 to 105.5)   | -15.7% (-19.7 to -11.7) | 120.4 (98.5 to 143.7)  | -10.1% (-27.6 to 11.3)  | 72.7 (50.3 to 100.1)  | -13.0% (-16.7 to -9.0)  | 2232.4 (1761.4 to 2711.7) | -14.6% (-32.7 to 7.6)   |
| India                | 1529.3 (1426.6 to 1638.6) | -7.1% (-8.7 to -5.4)    | 118.3 (105.4 to 132.4) | -15.1% (-17.5 to -12.8) | 164.7 (155.1 to 171.2) | -2.4% (-8.0 to 3.3)     | 68.4 (47.2 to 93.7)   | -8.2% (-9.3 to -6.9)    | 3222.7 (3067.7 to 3342.2) | -7.9% (-13.1 to -2.7)   |
| Nepal                | 1708.4 (1602.3 to 1827.2) | -3.5% (-7.0 to 0.3)     | 148.2 (132.5 to 164.8) | 5.1% (0.2 to 10.2)      | 157.3 (135.7 to 177.9) | 7.1% (-10.1 to 27.1)    | 76.1 (52.8 to 105.0)  | -8.5% (-12.6 to -4.0)   | 3010.3 (2525.7 to 3467.9) | -1.2% (-19.3 to 20.6)   |
| Pakistan             | 2172.6 (2029.6 to 2323.9) | 1.5% (-2.8 to 6.0)      | 257.8 (241.7 to 275.1) | 9.7% (5.0 to 14.5)      | 235.5 (202.4 to 275.3) | 30.0% (10.4 to 51.8)    | 88.6 (61.8 to 122.7)  | -2.5% (-6.8 to 1.9)     | 4470.1 (3736.1 to 5282.1) | 24.0% (3.0 to 48.1)     |
| Southeast Asia       |                           |                         |                        |                         |                        |                         |                       |                         |                           |                         |
| Cambodia             | 1165.0 (1095.2 to 1235.7) | -14.9% (-17.9 to -12.2) | 72.2 (62.6 to 82.5)    | -20.4% (-24.2 to -16.3) | 81.4 (72.8 to 91.9)    | -42.5% (-50.0 to -34.1) | 54.3 (37.1 to 74.9)   | -15.7% (-19.5 to -11.4) | 1498.2 (1319.7 to 1706.5) | -46.8% (-55.1 to -37.3) |
| Indonesia            | 1556.6 (1459.1 to 1658.2) | -13.4% (-14.7 to -11.9) | 95.1 (83.7 to 107.2)   | -9.7% (-11.7 to -7.7)   | 131.5 (123.8 to 140.3) | 8.2% (-2.1 to 18.4)     | 74.9 (51.5 to 103.9)  | -12.8% (-14.4 to -11.2) | 2508.1 (2365.8 to 2665.0) | 4.1% (-5.3 to 13.8)     |
| Laos                 | 1306.7 (1223.5 to 1393.7) | -23.4% (-26.4 to -20.4) | 86.9 (75.1 to 100.0)   | -37.2% (-40.9 to -33.1) | 156.0 (136.6 to 178.4) | -46.2% (-55.0 to -35.4) | 60.6 (41.4 to 83.5)   | -22.3% (-26.0 to -18.3) | 3060.3 (2602.1 to 3564.1) | -48.3% (-58.6 to -36.2) |
| Malaysia             | 1924.3 (1799.7 to 2049.0) | -4.5% (-7.9 to -1.1)    | 124.3 (110.6 to 138.8) | -23.3% (-27.5 to -19.0) | 149.8 (137.6 to 163.8) | -20.7% (-27.7 to -12.4) | 94.4 (65.3 to 130.4)  | -1.9% (-6.0 to 3.0)     | 2812.9 (2575.6 to 3091.4) | -14.5% (-22.7 to -5.1)  |
| Maldives             | 1387.2 (1299.3 to 1477.6) | -26.6% (-29.2 to -24.1) | 65.6 (56.8 to 75.8)    | -29.6% (-33.1 to -25.9) | 102.7 (95.5 to 110.2)  | -65.1% (-68.9 to -61.6) | 70.4 (48.1 to 96.6)   | -27.0% (-30.2 to -23.2) | 1750.0 (1613.9 to 1880.4) | -69.8% (-73.7 to -66.3) |
| Mauritius            | 1596.9 (1497.7 to 1705.1) | -17.1% (-19.9 to -14.1) | 72.2 (61.8 to 82.9)    | -29.5% (-33.8 to -25.2) | 117.1 (109.4 to 124.6) | -57.9% (-60.7 to -55.3) | 78.9 (54.3 to 110.5)  | -17.3% (-21.2 to -13.5) | 2084.1 (1937.6 to 2230.4) | -62.1% (-64.8 to -59.2) |
| Myanmar              | 1137.0 (1069.6 to 1209.5) | -26.9% (-29.7 to -23.9) | 84.4 (75.1 to 95.1)    | -38.6% (-42.5 to -34.7) | 84.1 (75.1 to 94.4)    | -44.4% (-53.8 to -33.7) | 48.2 (32.9 to 66.8)   | -27.5% (-31.5 to -24.0) | 1484.5 (1311.9 to 1673.4) | -49.0% (-58.9 to -37.8) |
| Philippines          | 1684.2 (1590.7 to 1780.2) | -0.9% (-4.0 to 2.4)     | 157.2 (145.0 to 170.8) | -7.7% (-11.6 to -3.9)   | 183.9 (164.3 to 204.9) | 3.4% (-8.5 to 17.7)     | 74.1 (50.9 to 102.7)  | 1.0% (-3.7 to 5.9)      | 3382.2 (2972.6 to 3821.1) | 9.2% (-4.9 to 26.2)     |
| Sri Lanka            | 1540.9 (1446.3 to 1643.2) | -19.1% (-22.2 to -16.2) | 96.1 (85.0 to 108.5)   | -36.0% (-39.3 to -32.3) | 107.9 (93.8 to 122.3)  | -40.4% (-49.0 to -31.7) | 72.1 (49.3 to 99.6)   | -15.5% (-19.4 to -11.7) | 1842.9 (1573.5 to 2129.6) | -45.9% (-54.4 to -36.9) |
| Seychelles           | 1351.2 (1274.4 to 1432.0) | -19.0% (-21.7 to -16.4) | 65.1 (55.9 to 75.7)    | -15.2% (-19.1 to -11.5) | 95.6 (89.1 to 102.2)   | -36.1% (-41.8 to -31.2) | 59.9 (40.6 to 83.5)   | -22.8% (-26.3 to -18.7) | 1750.9 (1621.7 to 1882.1) | -40.0% (-45.6 to -34.7) |
| Thailand             | 1279.2 (1198.6 to 1364.9) | -16.5% (-19.6 to -13.6) | 71.0 (62.2 to 80.3)    | -34.4% (-38.4 to -30.4) | 47.7 (43.3 to 53.3)    | -53.2% (-58.2 to -46.5) | 62.4 (43.0 to 86.4)   | -16.8% (-20.8 to -13.1) | 854.6 (765.0 to 964.5)    | -49.8% (-55.6 to -42.9) |
| Timor-Leste          | 1364.3 (1277.8 to 1455.2) | -15.1% (-18.1 to -12.0) | 77.6 (66.2 to 89.4)    | -12.1% (-15.8 to -8.1)  | 137.6 (108.0 to 163.3) | -26.2% (-39.5 to -12.7) | 66.3 (45.6 to 90.6)   | -16.5% (-20.6 to -12.3) | 2518.1 (1871.9 to 3070.3) | -29.5% (-45.6 to -13.5) |
| Vietnam              | 1364.7 (1284.0 to 1449.8) | -16.5% (-19.3 to -13.5) | 93.4 (83.9 to 103.7)   | -20.0% (-23.8 to -15.8) | 80.2 (73.1 to 88.8)    | -24.3% (-37.0 to -9.7)  | 60.6 (41.3 to 84.4)   | -20.6% (-24.6 to -16.5) | 1345.6 (1203.8 to 1525.2) | -28.3% (-41.0 to -11.8) |



|                                |                           |                         |                        |                         |                        |                         |                      |                         |                           |                         |
|--------------------------------|---------------------------|-------------------------|------------------------|-------------------------|------------------------|-------------------------|----------------------|-------------------------|---------------------------|-------------------------|
| East Asia                      |                           |                         |                        |                         |                        |                         |                      |                         |                           |                         |
| China                          | 1188.1 (1109.7 to 1272.0) | 1.2% (-0.5 to 3.2)      | 86.3 (76.3 to 97.5)    | -4.8% (-7.1 to -2.0)    | 107.2 (103.9 to 110.8) | 20.6% (10.1 to 27.5)    | 54.5 (37.5 to 75.2)  | -0.2% (-1.7 to 1.3)     | 1573.1 (1519.2 to 1629.6) | 4.8% (-3.3 to 11.1)     |
| North Korea                    | 1119.8 (1052.5 to 1188.1) | -1.2% (-4.4 to 2.1)     | 95.1 (84.8 to 106.3)   | 13.1% (8.1 to 18.3)     | 111.1 (91.2 to 129.6)  | 26.0% (3.2 to 56.1)     | 51.4 (35.5 to 71.1)  | -0.7% (-6.0 to 4.8)     | 1997.1 (1660.4 to 2335.4) | 27.8% (2.1 to 62.4)     |
| Taiwan (Province of China)     | 1098.8 (1032.7 to 1167.0) | -4.7% (-9.1 to 0.2)     | 68.1 (59.6 to 77.4)    | -21.0% (-25.5 to -16.9) | 45.6 (43.2 to 48.2)    | -48.6% (-51.8 to -45.2) | 53.8 (37.2 to 74.3)  | -6.6% (-12.3 to -0.6)   | 724.6 (683.1 to 771.9)    | -47.6% (-51.0 to -44.0) |
| Oceania                        |                           |                         |                        |                         |                        |                         |                      |                         |                           |                         |
| American Samoa                 | 1685.3 (1589.8 to 1795.7) | -8.6% (-11.4 to -5.9)   | 85.4 (73.2 to 98.3)    | -5.2% (-9.7 to 0.9)     | 139.1 (126.1 to 152.7) | -2.3% (-14.0 to 11.0)   | 78.3 (54.0 to 107.0) | -9.9% (-13.7 to -5.8)   | 2731.4 (2452.5 to 3028.8) | -5.5% (-17.1 to 8.0)    |
| Federated States of Micronesia | 1534.7 (1439.8 to 1633.1) | -16.0% (-18.8 to -13.2) | 90.6 (77.8 to 104.7)   | -11.6% (-15.5 to -7.8)  | 223.4 (199.0 to 251.2) | -0.6% (-15.3 to 15.6)   | 72.8 (50.2 to 100.5) | -17.5% (-21.3 to -13.8) | 4578.9 (3801.4 to 5331.9) | -4.2% (-23.1 to 16.3)   |
| Fiji                           | 1637.2 (1537.7 to 1739.1) | -11.7% (-14.7 to -8.8)  | 94.8 (82.2 to 109.2)   | -8.7% (-12.8 to -4.6)   | 226.6 (202.3 to 252.6) | -8.1% (-20.9 to 6.3)    | 76.2 (52.5 to 105.1) | -13.1% (-16.8 to -9.2)  | 4714.9 (4176.5 to 5300.3) | -10.7% (-24.9 to 4.6)   |
| Guam                           | 1424.3 (1327.7 to 1521.6) | -5.9% (-9.4 to -2.7)    | 72.1 (62.0 to 83.2)    | 0.5% (-3.5 to 5.4)      | 202.4 (187.0 to 217.9) | 21.2% (4.6 to 35.6)     | 71.8 (49.5 to 98.6)  | -5.9% (-10.4 to -1.3)   | 4129.8 (3809.1 to 4453.2) | 28.3% (11.3 to 44.8)    |
| Kiribati                       | 1673.3 (1568.1 to 1785.7) | -3.3% (-6.4 to 0.3)     | 97.0 (83.4 to 111.8)   | -1.3% (-5.6 to 3.4)     | 182.9 (160.6 to 205.5) | -1.1% (-13.9 to 12.7)   | 78.6 (54.4 to 108.0) | -5.0% (-9.3 to 0.3)     | 4171.9 (3589.4 to 4774.5) | -0.8% (-15.1 to 16.2)   |
| Marshall Islands               | 1404.6 (1317.3 to 1497.4) | -9.4% (-12.3 to -6.6)   | 86.1 (73.9 to 99.7)    | -5.3% (-9.2 to -1.0)    | 261.9 (232.6 to 293.7) | 1.7% (-9.7 to 14.1)     | 66.8 (46.1 to 91.5)  | -10.9% (-15.0 to -6.5)  | 5642.0 (4883.3 to 6540.3) | 3.6% (-10.4 to 18.2)    |
| Northern Mariana Islands       | 1738.0 (1626.3 to 1853.2) | -4.3% (-7.2 to -1.1)    | 80.0 (69.0 to 92.1)    | -2.2% (-6.6 to 2.5)     | 94.4 (86.5 to 103.7)   | -11.6% (-24.9 to 2.2)   | 84.2 (58.0 to 116.2) | -4.2% (-8.6 to 0.1)     | 1793.1 (1625.2 to 1973.2) | -10.0% (-26.2 to 5.5)   |
| Papua New Guinea               | 1927.9 (1821.5 to 2046.3) | -6.9% (-9.5 to -3.8)    | 134.0 (116.9 to 152.0) | 0.8% (-3.8 to 5.6)      | 267.5 (233.0 to 307.6) | 12.0% (-3.1 to 28.1)    | 81.1 (55.7 to 112.2) | -8.3% (-12.3 to -4.2)   | 6442.4 (5486.9 to 7579.8) | 9.9% (-7.5 to 29.5)     |
| Samoa                          | 1672.4 (1575.0 to 1779.6) | -6.8% (-9.7 to -3.9)    | 91.6 (78.5 to 106.0)   | -4.3% (-8.5 to 0.4)     | 173.7 (152.8 to 193.4) | 19.1% (1.5 to 40.8)     | 80.3 (54.6 to 110.5) | -7.8% (-11.9 to -3.9)   | 3114.3 (2708.9 to 3488.3) | 3.9% (-13.5 to 23.9)    |
| Solomon Islands                | 1544.5 (1445.5 to 1648.2) | -10.7% (-13.6 to -7.7)  | 95.4 (82.1 to 109.4)   | -8.1% (-12.7 to -4.0)   | 236.2 (212.5 to 260.8) | -14.1% (-25.7 to -0.3)  | 76.6 (52.7 to 105.5) | -11.7% (-15.6 to -7.6)  | 5048.5 (4432.7 to 5662.2) | -17.7% (-30.4 to -1.7)  |
| Tonga                          | 1605.3 (1505.6 to 1711.8) | -15.2% (-18.1 to -12.3) | 88.2 (75.7 to 102.0)   | -11.5% (-15.6 to -7.2)  | 122.9 (110.3 to 138.1) | -13.8% (-24.8 to -0.6)  | 80.4 (55.5 to 111.0) | -16.7% (-20.1 to -12.8) | 2370.4 (2107.8 to 2721.9) | -10.1% (-22.9 to 5.3)   |
| Vanuatu                        | 1723.6 (1621.1 to 1836.7) | -11.4% (-14.3 to -8.2)  | 102.2 (88.0 to 118.2)  | -7.5% (-11.6 to -3.4)   | 283.3 (220.5 to 344.3) | 0.0% (-16.0 to 21.8)    | 83.2 (57.8 to 114.9) | -13.2% (-17.1 to -9.4)  | 5855.4 (4384.8 to 7456.5) | -3.9% (-23.4 to 22.3)   |
| High-income Asia Pacific       |                           |                         |                        |                         |                        |                         |                      |                         |                           |                         |
| Brunei                         | 1112.0 (1027.4 to 1200.7) | -13.8% (-17.6 to -9.6)  | 109.3 (94.1 to 126.6)  | -19.2% (-23.9 to -14.8) | 105.2 (96.9 to 113.9)  | -44.4% (-49.5 to -39.1) | 39.8 (27.5 to 54.4)  | -27.1% (-30.9 to -23.1) | 1909.3 (1757.5 to 2070.8) | -46.2% (-51.1 to -40.8) |
| Japan                          | 1117.5 (1021.9 to 1221.5) | -9.0% (-12.6 to -4.9)   | 105.9 (92.1 to 121.2)  | -14.7% (-16.7 to -12.9) | 33.0 (31.8 to 34.1)    | -58.2% (-59.6 to -56.6) | 41.2 (28.6 to 56.4)  | -23.0% (-26.0 to -20.1) | 513.4 (492.2 to 533.2)    | -55.0% (-56.9 to -53.2) |
| Singapore                      | 1412.9 (1323.4 to 1496.8) | 6.2% (1.3 to 10.8)      | 161.2 (156.8 to 166.3) | 18.2% (14.1 to 22.2)    | 51.6 (48.3 to 55.3)    | -66.0% (-68.3 to -63.5) | 45.6 (31.6 to 62.5)  | -29.5% (-33.2 to -25.5) | 877.2 (803.8 to 965.8)    | -66.5% (-69.2 to -63.5) |
| South Korea                    | 837.4 (768.8 to 911.4)    | -10.7% (-15.2 to -5.7)  | 77.8 (68.0 to 88.2)    | -41.1% (-45.2 to -36.9) | 32.0 (29.7 to 34.5)    | -78.2% (-80.0 to -76.2) | 33.2 (23.0 to 45.4)  | -25.8% (-29.8 to -21.9) | 419.0 (385.4 to 455.4)    | -82.7% (-84.1 to -81.1) |
| High-income North America      |                           |                         |                        |                         |                        |                         |                      |                         |                           |                         |
| Canada                         | 1274.2 (1146.5 to 1415.1) | -19.9% (-25.3 to -13.6) | 134.0 (115.9 to 152.7) | -39.8% (-44.8 to -34.5) | 63.3 (60.2 to 66.6)    | -58.9% (-60.9 to -56.7) | 45.3 (31.3 to 62.0)  | -38.0% (-42.1 to -33.3) | 947.1 (894.0 to 1006.1)   | -61.5% (-63.7 to -59.2) |
| Greenland                      | 1324.6 (1211.9 to 1446.4) | -20.2% (-24.4 to -15.5) | 149.6 (128.7 to 174.7) | -30.2% (-34.6 to -25.5) | 90.5 (84.0 to 98.8)    | -52.5% (-57.1 to -47.7) | 35.1 (24.4 to 48.4)  | -40.8% (-44.2 to -37.0) | 1565.0 (1451.8 to 1691.0) | -54.7% (-59.2 to -49.9) |
| United States                  | 1775.9 (1617.8 to 1956.8) | -14.0% (-17.7 to -9.9)  | 195.9 (180.2 to 213.3) | -25.7% (-29.5 to -21.5) | 88.6 (86.2 to 91.1)    | -49.9% (-51.3 to -48.5) | 43.2 (30.3 to 58.2)  | -24.8% (-28.9 to -20.1) | 1476.0 (1429.8 to 1521.9) | -50.2% (-51.8 to -48.5) |
| Western Europe                 |                           |                         |                        |                         |                        |                         |                      |                         |                           |                         |
| Andorra                        | 1444.0 (1340.0 to 1545.0) | -15.8% (-19.5 to -11.9) | 146.7 (126.9 to 170.0) | -23.1% (-26.9 to -18.8) | 53.8 (47.7 to 61.1)    | -49.8% (-57.2 to -42.2) | 52.5 (36.2 to 71.3)  | -33.9% (-37.3 to -30.2) | 832.9 (729.0 to 959.2)    | -52.0% (-60.5 to -43.4) |
| Austria                        | 1457.0 (1357.2 to 1566.5) | -12.8% (-18.3 to -6.9)  | 150.9 (135.7 to 168.4) | -29.9% (-33.8 to -25.6) | 82.4 (77.4 to 91.1)    | -50.0% (-52.7 to -46.5) | 61.1 (42.2 to 83.8)  | -26.6% (-31.2 to -21.6) | 1072.9 (1004.8 to 1155.3) | -58.1% (-60.6 to -55.3) |
| Belgium                        | 1502.6 (1402.3 to 1608.0) | -7.5% (-12.4 to -2.0)   | 161.8 (143.3 to 182.8) | -25.6% (-30.3 to -20.5) | 55.9 (52.2 to 60.2)    | -61.6% (-64.0 to -59.1) | 57.8 (40.3 to 79.2)  | -25.0% (-29.8 to -20.2) | 801.8 (749.5 to 857.7)    | -65.3% (-67.6 to -63.1) |
| Cyprus                         | 1322.6 (1206.9 to 1448.4) | -13.7% (-19.1 to -7.2)  | 94.5 (81.0 to 109.8)   | -31.8% (-36.2 to -26.8) | 79.0 (72.1 to 89.3)    | -52.5% (-56.6 to -47.9) | 61.6 (42.7 to 83.8)  | -30.6% (-34.4 to -26.7) | 1314.3 (1186.5 to 1474.6) | -53.3% (-58.1 to -47.9) |
| Denmark                        | 1525.4 (1416.7 to 1646.1) | -23.4% (-27.2 to -19.1) | 166.7 (144.6 to 191.7) | -40.0% (-44.8 to -34.9) | 54.5 (51.3 to 58.4)    | -73.4% (-75.0 to -71.6) | 51.4 (35.4 to 70.1)  | -43.9% (-47.0 to -40.9) | 733.2 (686.1 to 788.8)    | -77.1% (-78.6 to -75.4) |
| Finland                        | 1729.0 (1593.7 to 1875.2) | -22.0% (-26.8 to -17.0) | 179.5 (160.2 to 201.9) | -37.0% (-40.9 to -32.5) | 88.6 (83.3 to 96.7)    | -59.9% (-62.4 to -56.6) | 72.4 (50.5 to 98.8)  | -34.8% (-38.8 to -29.7) | 1213.9 (1132.7 to 1340.4) | -66.9% (-69.2 to -63.7) |
| France                         | 1365.4 (1270.5 to 1468.3) | -12.4% (-16.8 to -7.3)  | 126.2 (111.6 to 142.1) | -21.8% (-27.9 to -15.3) | 38.3 (36.0 to 41.4)    | -58.3% (-60.7 to -55.4) | 49.1 (33.7 to 67.4)  | -34.3% (-37.6 to -31.2) | 548.9 (509.8 to 591.3)    | -60.5% (-63.2 to -57.4) |
| Germany                        | 1570.8 (1453.9 to 1687.7) | -16.4% (-20.7 to -12.1) | 172.0 (158.3 to 185.7) | -35.4% (-39.6 to -31.2) | 84.8 (77.4 to 92.2)    | -58.3% (-61.9 to -54.7) | 60.6 (42.1 to 79.1)  | -36.0% (-39.2 to -32.8) | 1181.8 (1068.2 to 1295.4) | -62.4% (-66.1 to -58.7) |

|                |                           |                         |                        |                         |                       |                         |                      |                         |                           |                         |
|----------------|---------------------------|-------------------------|------------------------|-------------------------|-----------------------|-------------------------|----------------------|-------------------------|---------------------------|-------------------------|
|                | to 1692.2)                | -11.4)                  | 185.8)                 | -30.7)                  | 93.0)                 | -54.3)                  | 83.0)                | -32.6)                  | to 1308.4)                | -58.3)                  |
| Greece         | 1482.1 (1358.4 to 1608.9) | -5.1% (-10.2 to 0.8)    | 159.2 (141.3 to 179.6) | -19.7% (-24.5 to -14.6) | 92.5 (87.6 to 97.3)   | -34.3% (-38.0 to -30.9) | 65.1 (45.2 to 89.4)  | -24.9% (-28.7 to -20.8) | 1520.4 (1429.5 to 1609.2) | -33.8% (-37.9 to -29.7) |
| Iceland        | 1396.1 (1274.2 to 1511.2) | -19.8% (-24.0 to -14.9) | 163.7 (143.1 to 188.3) | -28.3% (-32.5 to -24.4) | 71.1 (68.3 to 74.2)   | -57.2% (-59.2 to -55.1) | 57.6 (40.1 to 78.8)  | -37.2% (-40.6 to -33.5) | 973.5 (928.9 to 1021.0)   | -62.9% (-64.7 to -60.8) |
| Ireland        | 1488.7 (1373.9 to 1612.9) | -25.1% (-28.5 to -20.8) | 150.8 (131.8 to 173.5) | -41.6% (-45.7 to -36.9) | 70.9 (66.5 to 76.2)   | -68.6% (-70.5 to -66.4) | 58.7 (40.8 to 80.2)  | -41.8% (-44.7 to -38.9) | 991.2 (919.7 to 1068.3)   | -73.5% (-75.3 to -71.4) |
| Israel         | 1455.9 (1341.5 to 1576.9) | -15.3% (-19.5 to -10.5) | 145.2 (125.9 to 166.6) | -31.4% (-36.2 to -26.5) | 47.7 (44.8 to 50.7)   | -72.9% (-74.4 to -71.3) | 60.6 (42.0 to 82.5)  | -34.2% (-37.5 to -30.8) | 645.7 (603.6 to 693.4)    | -76.4% (-78.0 to -74.8) |
| Italy          | 1527.8 (1418.5 to 1631.6) | -18.7% (-23.4 to -13.3) | 154.5 (140.5 to 169.9) | -21.1% (-25.9 to -15.6) | 51.4 (47.9 to 56.6)   | -55.2% (-58.0 to -51.8) | 58.9 (40.8 to 81.1)  | -36.5% (-40.9 to -31.5) | 689.9 (640.2 to 743.5)    | -60.9% (-63.6 to -58.0) |
| Luxembourg     | 1357.6 (1251.4 to 1475.7) | -12.0% (-17.2 to -6.2)  | 111.1 (97.4 to 126.9)  | -26.4% (-30.6 to -22.2) | 60.6 (54.1 to 67.1)   | -60.3% (-64.2 to -56.1) | 61.0 (42.5 to 83.4)  | -26.7% (-30.8 to -21.6) | 806.0 (719.0 to 899.2)    | -66.7% (-70.3 to -62.8) |
| Malta          | 1354.7 (1234.4 to 1481.5) | -23.3% (-28.5 to -17.6) | 110.3 (96.0 to 125.5)  | -29.4% (-33.0 to -25.6) | 104.3 (99.5 to 109.2) | -49.9% (-52.4 to -47.4) | 67.6 (46.7 to 92.8)  | -35.0% (-39.0 to -30.8) | 1484.5 (1407.6 to 1561.0) | -54.5% (-57.0 to -52.0) |
| Netherlands    | 1821.1 (1697.3 to 1943.0) | -12.5% (-16.9 to -8.0)  | 202.9 (176.7 to 231.7) | -20.4% (-26.5 to -13.4) | 49.5 (46.7 to 52.8)   | -65.6% (-67.6 to -63.5) | 57.2 (39.6 to 78.2)  | -34.3% (-37.7 to -30.5) | 683.6 (643.0 to 728.2)    | -71.8% (-73.5 to -69.9) |
| Norway         | 1397.1 (1287.4 to 1518.2) | -18.2% (-22.9 to -12.6) | 149.7 (129.7 to 173.0) | -29.6% (-31.4 to -27.6) | 58.3 (56.2 to 62.1)   | -67.1% (-68.2 to -65.4) | 50.6 (35.2 to 68.6)  | -36.8% (-40.6 to -32.9) | 784.3 (752.9 to 828.1)    | -73.5% (-74.5 to -72.2) |
| Portugal       | 1156.4 (1054.5 to 1259.4) | -13.9% (-20.2 to -7.2)  | 66.3 (57.8 to 75.6)    | -48.3% (-51.7 to -44.8) | 48.3 (45.2 to 51.5)   | -64.1% (-66.6 to -61.3) | 46.1 (31.7 to 63.1)  | -39.0% (-42.3 to -35.6) | 683.8 (635.2 to 730.8)    | -66.2% (-68.8 to -63.5) |
| Spain          | 1370.9 (1265.6 to 1493.2) | -10.3% (-15.7 to -3.9)  | 109.9 (97.3 to 124.7)  | -30.2% (-35.4 to -24.1) | 45.4 (42.7 to 48.8)   | -60.1% (-62.7 to -56.8) | 51.1 (35.2 to 70.0)  | -33.7% (-37.0 to -30.5) | 679.8 (635.6 to 723.9)    | -61.2% (-63.9 to -58.2) |
| Sweden         | 1976.0 (1813.8 to 2146.6) | -14.8% (-18.1 to -11.1) | 157.6 (145.2 to 172.5) | -38.3% (-41.6 to -34.5) | 72.4 (68.2 to 79.5)   | -60.8% (-62.9 to -57.6) | 87.1 (59.8 to 119.6) | -22.7% (-25.9 to -19.6) | 946.1 (889.9 to 1023.8)   | -65.8% (-67.7 to -63.5) |
| Switzerland    | 1338.1 (1253.3 to 1424.3) | -11.5% (-16.7 to -5.7)  | 138.3 (121.9 to 155.8) | -29.2% (-33.8 to -24.7) | 53.4 (49.4 to 60.1)   | -60.4% (-63.7 to -55.9) | 51.7 (36.2 to 70.7)  | -28.0% (-32.9 to -22.9) | 648.0 (594.8 to 717.6)    | -68.0% (-71.0 to -64.5) |
| United Kingdom | 1814.1 (1675.9 to 1963.5) | -18.0% (-21.3 to -14.6) | 226.3 (196.3 to 260.1) | -18.8% (-21.5 to -15.9) | 61.3 (60.3 to 62.5)   | -67.9% (-68.5 to -67.2) | 53.5 (37.0 to 72.8)  | -41.4% (-42.9 to -39.9) | 968.8 (952.5 to 988.3)    | -70.5% (-71.0 to -69.8) |
| Australasia    |                           |                         |                        |                         |                       |                         |                      |                         |                           |                         |
| Australia      | 1537.2 (1413.4 to 1675.8) | -24.6% (-28.8 to -19.4) | 153.2 (135.1 to 173.3) | -42.3% (-46.7 to -37.7) | 57.5 (52.7 to 62.7)   | -66.5% (-69.4 to -63.5) | 47.0 (32.5 to 64.8)  | -38.8% (-42.1 to -35.4) | 800.9 (725.0 to 887.9)    | -70.3% (-73.2 to -67.0) |
| New Zealand    | 1702.4 (1541.3 to 1884.9) | -15.2% (-20.0 to -9.6)  | 188.4 (170.4 to 209.4) | -29.7% (-34.5 to -25.4) | 70.6 (67.0 to 74.8)   | -61.6% (-63.6 to -59.3) | 55.5 (39.4 to 75.9)  | -30.2% (-34.6 to -25.8) | 1026.1 (970.6 to 1086.3)  | -67.5% (-69.3 to -65.6) |

Data in parentheses are 95% uncertainty intervals. YLDs= years lived with disability; YLLs= years of life lost; SDI= Socio-demographic Index.

**Table S3. Percentage contribution of major risk factors to ischaemic heart disease age-standardised deaths by SDI quintile and GBD region, 1990-2017**

|                                     | 1990 PAF             |                      | 2017 PAF             |                      | Percentage change in PAF, 1990-2017 |                         |
|-------------------------------------|----------------------|----------------------|----------------------|----------------------|-------------------------------------|-------------------------|
|                                     | Females              | Males                | Females              | Males                | Females                             | Males                   |
| <b>Dietary risks</b>                |                      |                      |                      |                      |                                     |                         |
| Global                              | 70.6% (63.3 to 77.7) | 71.6% (64.3 to 78.8) | 68.1% (60.6 to 75.6) | 69.7% (62.2 to 77.0) | -3.5% (-5.1 to -2.3)                | -2.7% (-4.0 to -1.7)    |
| SDI quintiles                       |                      |                      |                      |                      |                                     |                         |
| Low-SDI quintile                    | 72.5% (64.8 to 80.1) | 73.0% (64.7 to 80.9) | 70.8% (62.7 to 78.7) | 71.2% (62.8 to 79.5) | -2.3% (-3.5 to -1.4)                | -2.5% (-3.7 to -1.5)    |
| Low-middle-SDI quintile             | 73.1% (65.8 to 80.2) | 73.3% (65.7 to 80.7) | 68.7% (60.8 to 76.6) | 69.4% (61.4 to 77.5) | -6.1% (-8.0 to -4.3)                | -5.3% (-7.0 to -3.9)    |
| Middle-SDI quintile                 | 73.8% (66.7 to 80.2) | 73.9% (66.6 to 80.6) | 69.2% (61.3 to 76.4) | 70.3% (62.7 to 77.5) | -6.2% (-8.5 to -4.3)                | -4.8% (-6.6 to -3.3)    |
| High-middle-SDI quintile            | 71.2% (63.9 to 78.2) | 73.1% (66.0 to 79.8) | 67.0% (59.2 to 74.2) | 69.6% (62.5 to 76.5) | -5.9% (-8.0 to -4.3)                | -4.8% (-6.5 to -3.4)    |
| High-SDI quintile                   | 67.3% (59.9 to 74.9) | 69.0% (61.7 to 76.5) | 64.8% (57.2 to 72.4) | 66.8% (59.5 to 74.4) | -3.8% (-5.4 to -2.4)                | -3.1% (-4.5 to -1.7)    |
| GBD regions                         |                      |                      |                      |                      |                                     |                         |
| Central Sub-Saharan Africa          | 69.4% (59.5 to 78.7) | 71.1% (61.2 to 80.4) | 69.5% (60.2 to 78.4) | 70.6% (60.9 to 79.8) | 0.2% (-1.0 to 1.9)                  | -0.7% (-1.8 to 0.6)     |
| Eastern Sub-Saharan Africa          | 71.7% (63.7 to 78.8) | 72.6% (64.7 to 80.0) | 69.9% (62.1 to 76.9) | 69.2% (60.2 to 77.9) | -2.6% (-3.8 to -1.5)                | -4.7% (-8.1 to -2.0)    |
| Southern Sub-Saharan Africa         | 69.4% (60.9 to 77.6) | 69.6% (60.8 to 78.5) | 67.4% (58.8 to 75.8) | 66.8% (57.3 to 76.5) | -2.9% (-4.6 to -1.2)                | -4.1% (-6.5 to -2.3)    |
| Western Sub-Saharan Africa          | 68.5% (59.3 to 77.7) | 68.7% (59.2 to 77.9) | 66.8% (57.8 to 75.5) | 67.2% (57.9 to 76.4) | -2.5% (-4.2 to -0.2)                | -2.2% (-3.6 to -0.3)    |
| Andean Latin America                | 71.3% (63.9 to 78.1) | 71.0% (63.3 to 78.3) | 68.7% (61.0 to 75.8) | 68.4% (60.7 to 76.1) | -3.7% (-5.3 to -2.2)                | -3.6% (-5.3 to -2.2)    |
| Tropical Latin America              | 66.5% (58.4 to 74.0) | 67.6% (59.4 to 75.4) | 63.8% (55.6 to 71.8) | 64.5% (56.0 to 72.7) | -4.1% (-7.1 to -1.4)                | -4.6% (-7.6 to -1.9)    |
| Central Latin America               | 71.6% (64.3 to 78.8) | 72.5% (65.2 to 79.4) | 65.1% (57.1 to 73.9) | 67.0% (59.2 to 75.1) | -9.1% (-12.6 to -5.9)               | -7.5% (-10.6 to -4.9)   |
| Southern Latin America              | 70.1% (61.8 to 77.4) | 71.7% (63.8 to 79.3) | 67.2% (59.1 to 74.8) | 69.3% (61.4 to 76.9) | -4.2% (-6.5 to -2.3)                | -3.3% (-5.4 to -1.4)    |
| Caribbean                           | 67.5% (59.0 to 75.9) | 67.7% (58.8 to 76.3) | 62.1% (52.2 to 71.7) | 62.6% (53.2 to 72.3) | -8.0% (-11.5 to -4.9)               | -7.5% (-10.6 to -4.6)   |
| Central Europe                      | 73.6% (66.6 to 79.8) | 75.6% (68.9 to 81.6) | 65.1% (57.2 to 72.8) | 69.7% (62.6 to 76.5) | -11.5% (-14.9 to -7.8)              | -7.7% (-10.0 to -5.8)   |
| Eastern Europe                      | 70.4% (62.7 to 77.8) | 73.4% (66.1 to 80.1) | 66.8% (58.7 to 74.7) | 70.4% (62.7 to 77.7) | -5.1% (-7.3 to -3.4)                | -4.2% (-6.0 to -2.7)    |
| North Africa and Middle East        | 70.1% (62.8 to 77.5) | 69.9% (62.0 to 77.9) | 64.5% (56.1 to 72.8) | 64.0% (56.0 to 72.5) | -8.1% (-10.6 to -6.0)               | -8.4% (-10.6 to -6.5)   |
| Central Asia                        | 73.9% (66.5 to 80.4) | 75.0% (67.8 to 81.7) | 68.9% (61.5 to 75.8) | 69.3% (61.8 to 76.3) | -6.7% (-9.4 to -4.4)                | -7.6% (-10.5 to -5.1)   |
| South Asia                          | 73.4% (66.0 to 80.6) | 73.8% (65.9 to 81.2) | 68.1% (59.9 to 76.7) | 69.4% (61.4 to 77.7) | -7.3% (-9.9 to -4.7)                | -6.0% (-7.7 to -4.3)    |
| Southeast Asia                      | 76.2% (69.2 to 82.0) | 76.5% (69.5 to 82.5) | 71.3% (63.6 to 78.0) | 71.6% (64.1 to 78.7) | -6.4% (-8.5 to -4.6)                | -6.3% (-8.4 to -4.5)    |
| East Asia                           | 76.6% (69.4 to 82.5) | 77.0% (69.6 to 83.0) | 71.3% (63.6 to 78.0) | 73.4% (66.3 to 79.9) | -6.9% (-9.7 to -4.5)                | -4.6% (-7.4 to -2.0)    |
| Oceania                             | 77.0% (69.6 to 83.4) | 78.6% (70.7 to 85.6) | 76.7% (69.2 to 83.0) | 78.4% (70.8 to 85.1) | -0.4% (-1.7 to 1.0)                 | -0.3% (-1.5 to 1.1)     |
| High-income Asia Pacific            | 66.5% (59.3 to 73.0) | 65.7% (58.8 to 72.0) | 60.9% (53.5 to 68.0) | 62.4% (55.3 to 69.4) | -8.4% (-11.7 to -5.2)               | -5.0% (-7.9 to -2.2)    |
| High-income North America           | 68.4% (60.8 to 75.5) | 70.2% (62.6 to 77.7) | 65.9% (58.4 to 73.2) | 67.8% (60.1 to 75.2) | -3.7% (-6.3 to -0.9)                | -3.4% (-5.9 to -0.5)    |
| Western Europe                      | 65.3% (57.2 to 73.7) | 67.3% (59.3 to 75.7) | 63.8% (55.6 to 72.3) | 65.9% (57.7 to 74.3) | -2.3% (-3.9 to -0.8)                | -2.1% (-3.7 to -0.9)    |
| Australasia                         | 65.9% (58.0 to 74.2) | 66.6% (58.3 to 75.3) | 62.5% (54.2 to 71.2) | 63.4% (54.5 to 72.6) | -5.1% (-7.8 to -2.9)                | -4.9% (-8.1 to -2.8)    |
| <b>High systolic blood pressure</b> |                      |                      |                      |                      |                                     |                         |
| Global                              | 57.6% (45.5 to 68.5) | 53.9% (44.2 to 63.8) | 55.5% (43.9 to 66.4) | 53.1% (43.3 to 62.8) | -3.6% (-4.9 to -2.5)                | -1.5% (-2.6 to -0.5)    |
| SDI quintiles                       |                      |                      |                      |                      |                                     |                         |
| Low-SDI quintile                    | 52.6% (43.3 to 62.0) | 46.3% (38.2 to 55.1) | 53.3% (43.8 to 63.2) | 48.2% (40.0 to 57.0) | 1.3% (-0.6 to 3.2)                  | 4.1% (2.2 to 6.1)       |
| Low-middle-SDI quintile             | 55.7% (45.9 to 65.3) | 49.9% (41.6 to 58.8) | 57.5% (47.5 to 67.5) | 54.0% (44.9 to 63.2) | 3.3% (1.9 to 4.6)                   | 8.2% (6.5 to 10.2)      |
| Middle-SDI quintile                 | 52.7% (41.9 to 63.4) | 49.8% (40.3 to 59.8) | 54.7% (42.7 to 65.9) | 53.0% (42.9 to 63.0) | 3.7% (1.2 to 6.1)                   | 6.3% (4.5 to 8.4)       |
| High-middle-SDI quintile            | 58.4% (45.2 to 69.8) | 54.5% (44.9 to 64.5) | 57.7% (44.4 to 69.5) | 56.0% (45.7 to 66.4) | -1.2% (-3.3 to 0.5)                 | 2.7% (1.3 to 4.1)       |
| High-SDI quintile                   | 60.2% (46.5 to 72.0) | 58.2% (47.9 to 68.2) | 51.0% (37.6 to 63.4) | 50.0% (39.8 to 60.2) | -15.3% (-19.9 to -11.6)             | -14.1% (-17.3 to -11.1) |
| GBD regions                         |                      |                      |                      |                      |                                     |                         |
| Central Sub-Saharan Africa          | 61.7% (51.0 to 71.9) | 57.9% (49.4 to 66.9) | 59.0% (48.5 to 69.6) | 56.9% (47.9 to 65.6) | -4.5% (-7.6 to -1.5)                | -1.7% (-4.4 to 1.0)     |
| Eastern Sub-Saharan Africa          | 50.6% (40.9 to 60.4) | 42.7% (34.9 to 51.4) | 58.4% (47.4 to 68.8) | 54.4% (45.6 to 63.3) | 15.4% (11.8 to 19.9)                | 27.4% (22.2 to 34.4)    |
| Southern Sub-Saharan Africa         | 61.5% (50.4 to 72.2) | 59.9% (51.0 to 69.3) | 62.9% (50.9 to 73.3) | 60.0% (50.2 to 69.7) | 2.3% (-0.9 to 5.1)                  | 0.2% (-2.5 to 2.6)      |
| Western Sub-Saharan Africa          | 55.5% (44.5 to 66.1) | 50.2% (40.3 to 60.2) | 61.1% (49.9 to 71.6) | 57.0% (47.4 to 67.0) | 10.1% (7.6 to 13.4)                 | 13.5% (9.9 to 17.4)     |
| Andean Latin America                | 42.1% (31.6 to 52.7) | 39.5% (30.8 to 49.2) | 48.3% (36.4 to 59.7) | 46.7% (36.6 to 56.9) | 14.8% (9.6 to 20.4)                 | 18.1% (13.5 to 24.0)    |
| Tropical Latin America              | 53.3% (41.7 to 64.0) | 52.4% (43.4 to 61.6) | 53.7% (43.4 to 64.0) | 54.9% (46.5 to 63.9) | 0.8% (-1.2 to 3.5)                  | 4.7% (2.8 to 6.9)       |
| Central Latin America               | 51.5% (40.2 to 62.5) | 51.2% (42.1 to 61.2) | 52.5% (40.4 to 63.9) | 52.6% (43.2 to 62.6) | 2.0% (-1.5 to 5.3)                  | 2.7% (0.4 to 5.0)       |
| Southern Latin America              | 36.7% (26.7 to 47.3) | 34.9% (27.7 to 43.6) | 42.7% (31.8 to 53.9) | 42.4% (34.1 to 51.4) | 16.2% (8.2 to 24.9)                 | 21.3% (14.5 to 29.6)    |
| Caribbean                           | 48.7% (38.4 to 58.9) | 49.4% (40.1 to 59.2) | 49.3% (39.4 to 60.2) | 51.1% (42.2 to 60.7) | 1.2% (-2.0 to 4.8)                  | 3.5% (0.8 to 6.5)       |
| Central Europe                      | 64.5% (50.9 to 75.8) | 61.9% (51.4 to 71.9) | 59.7% (44.7 to 72.4) | 58.9% (47.6 to 69.6) | -7.4% (-11.6 to -4.2)               | -4.7% (-6.9 to -2.9)    |
| Eastern Europe                      | 62.3% (49.0 to 73.8) | 58.3% (48.5 to 68.2) | 61.4% (48.1 to 73.0) | 59.9% (49.9 to 69.5) | -1.4% (-2.9 to -0.2)                | 2.7% (0.9 to 4.6)       |
| North Africa and Middle East        | 59.1% (49.4 to 68.7) | 52.4% (43.8 to 61.6) | 58.4% (47.7 to 68.8) | 53.6% (44.2 to 63.1) | -1.1% (-3.3 to 0.8)                 | 2.3% (-0.2 to 4.2)      |
| Central Asia                        | 55.1% (43.4 to 66.1) | 54.1% (44.4 to 63.8) | 56.2% (44.2 to 68.0) | 54.7% (44.3 to 64.9) | 2.0% (-0.7 to 4.4)                  | 1.1% (-1.8 to 3.6)      |
| South Asia                          | 53.7% (44.3 to 63.1) | 48.6% (40.4 to 57.2) | 54.2% (44.6 to 64.3) | 51.2% (42.4 to 60.4) | 1.0% (-1.2 to 2.8)                  | 5.3% (3.3 to 7.3)       |
| Southeast Asia                      | 57.7% (47.2 to 67.7) | 53.4% (44.5 to 62.8) | 60.1% (49.0 to 70.4) | 57.1% (47.9 to 66.2) | 4.2% (2.1 to 6.3)                   | 7.1% (5.1 to 9.3)       |
| East Asia                           | 48.8% (37.6 to 59.6) | 46.2% (36.4 to 57.0) | 53.0% (39.9 to 65.5) | 51.8% (40.5 to 62.8) | 8.6% (2.3 to 15.5)                  | 12.2% (7.0 to 18.1)     |
| Oceania                             | 41.5% (33.7 to 50.5) | 38.1% (30.9 to 45.7) | 48.4% (39.9 to 57.5) | 45.4% (37.8 to 53.1) | 16.7% (10.8 to 24.2)                | 19.3% (13.3 to 27.0)    |
| High-income Asia Pacific            | 59.3% (45.2 to 71.2) | 58.8% (47.1 to 69.2) | 48.2% (34.6 to 61.0) | 51.8% (40.7 to 62.3) | -18.7% (-24.4 to -13.9)             | -11.8% (-14.7 to -9.0)  |
| High-income North America           | 57.6% (44.6 to 69.4) | 53.7% (43.8 to 63.7) | 47.8% (35.9 to 59.3) | 43.8% (34.5 to 53.6) | -17.0% (-22.5 to -12.2)             | -18.4% (-23.1 to -14.3) |
| Western Europe                      | 61.5% (47.8 to 73.3) | 61.0% (50.5 to 70.9) | 53.3% (38.5 to 66.3) | 53.6% (42.0 to 64.7) | -13.4% (-19.2 to -8.8)              | -12.2% (-16.3 to -8.7)  |

|                                    |                      |                      |                      |                      |                         |                         |
|------------------------------------|----------------------|----------------------|----------------------|----------------------|-------------------------|-------------------------|
| Australasia                        | 58.3% (45.4 to 70.4) | 56.6% (46.2 to 66.8) | 50.3% (35.7 to 63.4) | 49.3% (38.0 to 60.1) | -13.8% (-22.2 to -7.3)  | -12.9% (-18.7 to -8.1)  |
| <b>High LDL cholesterol</b>        |                      |                      |                      |                      |                         |                         |
| Global                             | 45.4% (33.1 to 58.0) | 43.4% (33.5 to 54.3) | 43.0% (31.3 to 55.4) | 40.5% (31.1 to 50.7) | -5.2% (-6.4 to -4.0)    | -6.8% (-8.7 to -5.1)    |
| SDI quintiles                      |                      |                      |                      |                      |                         |                         |
| Low-SDI quintile                   | 33.0% (24.5 to 42.3) | 31.4% (23.7 to 40.1) | 35.1% (26.1 to 44.8) | 33.1% (25.2 to 41.8) | 6.4% (3.2 to 9.7)       | 5.2% (2.4 to 8.9)       |
| Low-middle-SDI quintile            | 39.3% (30.0 to 49.3) | 36.5% (28.3 to 45.6) | 41.5% (31.7 to 52.3) | 37.7% (29.1 to 47.2) | 5.7% (3.4 to 7.9)       | 3.3% (1.8 to 5.0)       |
| Middle-SDI quintile                | 41.2% (30.3 to 53.1) | 39.1% (29.8 to 49.3) | 42.1% (30.4 to 54.8) | 39.3% (29.9 to 49.8) | 2.4% (-0.5 to 4.5)      | 0.5% (-0.7 to 1.4)      |
| High-middle-SDI quintile           | 45.6% (32.6 to 59.0) | 44.3% (34.1 to 55.2) | 44.5% (31.0 to 58.1) | 42.4% (32.1 to 53.3) | -2.5% (-5.5 to -0.5)    | -4.4% (-6.0 to -3.1)    |
| High-SDI quintile                  | 49.6% (35.5 to 63.5) | 49.2% (38.2 to 60.7) | 43.8% (30.0 to 58.0) | 42.7% (32.0 to 54.2) | -11.8% (-17.1 to -7.7)  | -13.2% (-17.3 to -9.6)  |
| GBD regions                        |                      |                      |                      |                      |                         |                         |
| Central Sub-Saharan Africa         | 32.5% (23.2 to 42.7) | 29.9% (22.0 to 38.7) | 33.6% (24.2 to 44.1) | 30.3% (22.5 to 39.0) | 3.5% (0.1 to 7.3)       | 1.2% (-2.2 to 5.2)      |
| Eastern Sub-Saharan Africa         | 31.3% (22.5 to 41.3) | 26.6% (19.1 to 35.2) | 33.9% (24.5 to 44.5) | 28.2% (20.8 to 36.7) | 8.4% (4.8 to 12.6)      | 6.3% (2.8 to 10.8)      |
| Southern Sub-Saharan Africa        | 37.8% (28.2 to 48.8) | 35.2% (26.8 to 44.3) | 38.7% (28.1 to 50.4) | 34.8% (25.8 to 44.3) | 2.3% (-1.6 to 5.5)      | -1.1% (-4.5 to 2.2)     |
| Western Sub-Saharan Africa         | 30.8% (21.8 to 41.2) | 25.2% (17.7 to 33.9) | 34.4% (24.8 to 45.2) | 28.6% (20.7 to 37.6) | 11.6% (8.2 to 16.2)     | 13.7% (9.5 to 19.4)     |
| Andean Latin America               | 40.1% (29.1 to 52.2) | 37.9% (28.4 to 48.5) | 42.8% (31.0 to 55.5) | 39.7% (29.6 to 50.6) | 6.6% (3.3 to 10.0)      | 4.6% (1.9 to 7.5)       |
| Tropical Latin America             | 46.7% (35.1 to 58.8) | 46.9% (37.2 to 57.0) | 50.0% (38.6 to 61.3) | 48.4% (38.8 to 58.0) | 6.9% (3.2 to 11.7)      | 3.1% (0.1 to 6.5)       |
| Central Latin America              | 43.4% (32.0 to 55.7) | 41.2% (31.6 to 51.6) | 45.0% (32.3 to 57.9) | 42.9% (33.0 to 53.6) | 3.8% (-0.1 to 7.1)      | 4.0% (2.3 to 6.1)       |
| Southern Latin America             | 42.8% (29.8 to 55.8) | 42.5% (32.7 to 52.8) | 45.0% (31.8 to 58.3) | 43.9% (33.9 to 54.7) | 5.1% (2.5 to 8.0)       | 3.2% (0.9 to 5.5)       |
| Caribbean                          | 42.6% (31.8 to 54.2) | 39.5% (29.9 to 49.8) | 44.2% (33.4 to 55.4) | 40.1% (31.0 to 50.0) | 3.9% (1.9 to 6.7)       | 1.6% (-1.0 to 4.7)      |
| Central Europe                     | 46.6% (33.1 to 60.6) | 46.4% (35.8 to 57.8) | 44.4% (29.8 to 59.1) | 44.0% (33.0 to 55.7) | -4.8% (-10.8 to -0.5)   | -5.0% (-7.9 to -2.9)    |
| Eastern Europe                     | 47.8% (34.0 to 62.1) | 46.5% (36.3 to 57.4) | 47.3% (33.7 to 61.1) | 45.1% (35.3 to 55.4) | -1.1% (-3.1 to 0.6)     | -3.0% (-5.7 to -0.1)    |
| North Africa and Middle East       | 43.4% (33.1 to 54.0) | 41.6% (32.7 to 51.0) | 45.2% (34.4 to 56.5) | 41.2% (32.0 to 51.2) | 4.1% (1.0 to 7.0)       | -1.0% (-4.5 to 1.9)     |
| Central Asia                       | 40.5% (29.1 to 52.2) | 39.1% (29.7 to 49.2) | 42.2% (30.2 to 54.9) | 38.3% (28.4 to 49.3) | 4.2% (1.2 to 6.7)       | -1.9% (-6.5 to 1.3)     |
| South Asia                         | 37.1% (28.3 to 46.6) | 35.1% (27.0 to 44.0) | 39.6% (29.8 to 50.1) | 36.2% (27.8 to 45.4) | 6.7% (2.7 to 10.4)      | 3.1% (0.3 to 5.7)       |
| Southeast Asia                     | 42.2% (31.9 to 53.1) | 39.5% (30.6 to 49.3) | 43.6% (32.8 to 55.0) | 39.8% (31.2 to 49.3) | 3.4% (1.4 to 5.5)       | 0.6% (-0.9 to 2.3)      |
| East Asia                          | 39.2% (28.2 to 51.6) | 38.8% (28.9 to 49.8) | 40.1% (27.2 to 53.8) | 38.4% (27.9 to 50.4) | 2.1% (-5.4 to 6.9)      | -0.8% (-4.7 to 2.0)     |
| Oceania                            | 44.2% (34.8 to 53.8) | 46.6% (38.4 to 55.3) | 45.8% (36.5 to 55.9) | 47.0% (39.2 to 55.3) | 3.7% (0.2 to 7.2)       | 0.9% (-2.5 to 4.5)      |
| High-income Asia Pacific           | 42.2% (29.1 to 55.7) | 40.4% (29.8 to 52.0) | 43.0% (28.4 to 58.1) | 42.4% (31.7 to 54.5) | 2.0% (-3.8 to 6.4)      | 5.0% (2.8 to 7.9)       |
| High-income North America          | 53.1% (39.1 to 66.3) | 53.3% (42.2 to 64.6) | 41.2% (29.0 to 54.0) | 39.5% (30.1 to 50.2) | -22.4% (-27.6 to -17.7) | -25.9% (-31.2 to -21.2) |
| Western Europe                     | 49.4% (35.0 to 63.9) | 48.8% (37.8 to 60.2) | 45.9% (30.4 to 61.3) | 45.0% (33.4 to 57.3) | -7.1% (-14.5 to -1.9)   | -7.7% (-12.7 to -3.3)   |
| Australasia                        | 50.2% (36.1 to 64.2) | 48.2% (37.2 to 59.4) | 47.7% (30.9 to 63.5) | 46.5% (34.4 to 58.8) | -4.9% (-15.7 to 3.1)    | -3.5% (-10.7 to 2.9)    |
| <b>High fasting plasma glucose</b> |                      |                      |                      |                      |                         |                         |
| Global                             | 23.0% (12.0 to 39.0) | 23.3% (13.0 to 37.6) | 25.3% (13.7 to 42.1) | 25.9% (15.3 to 40.1) | 10.1% (1.8 to 18.8)     | 11.2% (3.8 to 20.8)     |
| SDI quintiles                      |                      |                      |                      |                      |                         |                         |
| Low-SDI quintile                   | 22.2% (12.2 to 37.0) | 22.5% (12.9 to 36.8) | 26.2% (14.5 to 43.2) | 24.1% (14.6 to 38.0) | 17.9% (7.8 to 30.8)     | 7.1% (-3.3 to 19.4)     |
| Low-middle-SDI quintile            | 23.2% (12.9 to 38.3) | 22.3% (12.8 to 36.0) | 27.7% (15.6 to 44.8) | 26.8% (16.0 to 41.9) | 19.3% (9.9 to 30.6)     | 20.1% (10.0 to 31.4)    |
| Middle-SDI quintile                | 21.7% (11.7 to 37.0) | 21.1% (11.9 to 34.3) | 23.9% (13.0 to 39.3) | 24.1% (14.4 to 37.6) | 10.1% (3.9 to 17.4)     | 14.2% (4.5 to 25.7)     |
| High-middle-SDI quintile           | 23.0% (11.8 to 39.9) | 22.9% (13.0 to 37.2) | 23.0% (11.7 to 39.8) | 23.2% (13.7 to 35.9) | 0.1% (-10.2 to 12.2)    | 1.3% (-7.0 to 10.6)     |
| High-SDI quintile                  | 23.7% (11.8 to 40.8) | 24.7% (13.7 to 40.2) | 28.9% (14.3 to 51.3) | 31.6% (17.4 to 50.8) | 21.7% (10.0 to 35.1)    | 28.0% (17.5 to 40.7)    |
| GBD regions                        |                      |                      |                      |                      |                         |                         |
| Central Sub-Saharan Africa         | 34.1% (17.9 to 59.4) | 35.0% (20.4 to 56.7) | 35.9% (19.3 to 60.3) | 36.5% (21.1 to 58.6) | 5.2% (-1.9 to 14.4)     | 4.2% (-1.6 to 11.2)     |
| Eastern Sub-Saharan Africa         | 26.8% (13.5 to 47.4) | 29.0% (15.8 to 50.4) | 29.0% (14.5 to 51.4) | 30.6% (16.7 to 51.0) | 8.3% (0.2 to 17.4)      | 5.5% (-0.5 to 12.2)     |
| Southern Sub-Saharan Africa        | 31.7% (16.6 to 54.4) | 31.6% (17.6 to 52.3) | 35.7% (19.0 to 59.6) | 36.4% (20.6 to 58.4) | 12.8% (6.5 to 21.0)     | 15.2% (8.8 to 23.8)     |
| Western Sub-Saharan Africa         | 18.4% (8.8 to 35.3)  | 21.8% (10.5 to 41.9) | 29.1% (14.2 to 51.8) | 28.8% (14.7 to 49.9) | 57.6% (26.3 to 102.3)   | 32.1% (12.0 to 66.7)    |
| Andean Latin America               | 20.2% (10.5 to 35.4) | 19.4% (10.1 to 34.2) | 23.8% (12.0 to 42.9) | 25.7% (13.7 to 45.0) | 17.3% (-4.7 to 42.8)    | 32.6% (6.2 to 69.1)     |
| Tropical Latin America             | 18.1% (10.1 to 30.9) | 16.6% (10.1 to 25.9) | 16.4% (9.5 to 26.5)  | 16.0% (10.1 to 23.8) | -9.5% (-25.4 to 7.4)    | -3.2% (-15.7 to 10.6)   |
| Central Latin America              | 25.2% (13.9 to 42.0) | 27.3% (15.6 to 43.0) | 27.8% (14.8 to 46.5) | 31.0% (17.9 to 49.4) | 10.5% (-2.5 to 25.1)    | 13.7% (2.8 to 25.0)     |
| Southern Latin America             | 29.4% (14.1 to 54.3) | 32.8% (17.4 to 54.6) | 29.2% (14.8 to 50.1) | 35.6% (20.2 to 58.3) | -0.7% (-28.4 to 36.8)   | 8.6% (-6.1 to 29.9)     |
| Caribbean                          | 24.4% (14.6 to 38.8) | 25.4% (14.9 to 39.1) | 27.8% (15.8 to 44.0) | 28.8% (16.9 to 44.9) | 13.7% (1.2 to 27.9)     | 13.6% (-2.9 to 31.5)    |
| Central Europe                     | 26.9% (12.9 to 49.7) | 26.9% (14.6 to 44.6) | 29.8% (13.8 to 54.1) | 31.3% (17.2 to 50.5) | 10.8% (-1.9 to 25.7)    | 16.2% (3.6 to 32.6)     |
| Eastern Europe                     | 22.9% (11.6 to 40.5) | 23.2% (13.6 to 37.3) | 24.4% (12.5 to 41.6) | 25.3% (15.2 to 40.1) | 6.6% (-10.1 to 27.3)    | 9.2% (-8.1 to 29.4)     |
| North Africa and Middle East       | 28.2% (15.9 to 45.7) | 26.3% (15.0 to 42.1) | 34.3% (19.5 to 54.5) | 33.8% (19.5 to 54.3) | 21.7% (10.2 to 38.2)    | 28.3% (17.7 to 40.9)    |
| Central Asia                       | 32.2% (16.5 to 56.4) | 35.0% (19.4 to 57.2) | 35.3% (18.1 to 59.2) | 36.9% (20.2 to 60.8) | 9.7% (0.6 to 21.4)      | 5.5% (-1.8 to 12.8)     |
| South Asia                         | 19.4% (10.6 to 32.8) | 18.7% (11.0 to 30.3) | 25.3% (14.1 to 41.7) | 23.9% (14.8 to 36.8) | 30.6% (16.2 to 46.2)    | 27.7% (12.7 to 43.9)    |
| Southeast Asia                     | 28.8% (15.5 to 48.9) | 25.9% (14.3 to 43.5) | 34.4% (19.0 to 56.2) | 32.4% (18.9 to 51.5) | 19.4% (11.0 to 29.1)    | 25.0% (11.6 to 41.1)    |
| East Asia                          | 14.6% (8.2 to 24.1)  | 12.6% (7.3 to 20.5)  | 15.2% (8.1 to 26.1)  | 14.4% (8.5 to 22.2)  | 4.6% (-8.3 to 17.7)     | 13.9% (0.1 to 26.8)     |
| Oceania                            | 38.3% (23.7 to 58.6) | 38.9% (25.3 to 57.6) | 39.4% (25.2 to 58.2) | 40.8% (27.2 to 58.3) | 2.9% (-5.4 to 11.9)     | 5.0% (-3.2 to 14.7)     |
| High-income Asia Pacific           | 19.3% (10.0 to 31.8) | 21.1% (11.9 to 34.0) | 20.8% (10.5 to 35.4) | 21.9% (12.4 to 35.0) | 7.4% (-8.6 to 25.8)     | 3.9% (-9.1 to 20.2)     |
| High-income North America          | 19.6% (11.3 to 30.9) | 20.5% (12.6 to 31.0) | 27.7% (15.4 to 44.5) | 33.0% (19.0 to 50.9) | 41.1% (24.3 to 61.5)    | 60.5% (38.4 to 83.3)    |
| Western Europe                     | 26.6% (12.3 to 47.6) | 27.8% (14.3 to 46.9) | 32.8% (14.2 to 62.7) | 34.1% (17.5 to 57.9) | 23.1% (3.6 to 45.2)     | 22.6% (9.4 to 39.5)     |
| Australasia                        | 22.8% (10.6 to 44.0) | 25.9% (13.0 to 45.6) | 20.8% (9.7 to 43.0)  | 26.3% (12.7 to 48.5) | -8.4% (-38.6 to 33.3)   | 1.4% (-27.1 to 41.2)    |
| <b>Tobacco use</b>                 |                      |                      |                      |                      |                         |                         |
| Global                             | 17.3% (16.3 to 18.5) | 32.6% (31.4 to 33.7) | 11.6% (10.7 to 12.7) | 27.1% (26.0 to 28.3) | -32.8% (-36.0 to -29.6) | -16.8% (-19.0 to -14.7) |
| SDI quintiles                      |                      |                      |                      |                      |                         |                         |
| Low-SDI quintile                   | 11.3% (10.0 to 12.8) | 25.5% (23.6 to 27.4) | 9.9% (8.6 to 11.3)   | 22.5% (20.7 to 24.3) | -12.5% (-22.8 to -1.6)  | -11.7% (-18.6 to -4.2)  |

|                              |                      |                      |                      |                      |                         |                         |
|------------------------------|----------------------|----------------------|----------------------|----------------------|-------------------------|-------------------------|
| Low-middle-SDI quintile      | 13.2% (11.9 to 14.6) | 30.1% (28.6 to 32.0) | 9.8% (8.7 to 11.0)   | 25.4% (23.8 to 27.0) | -25.9% (-31.4 to -19.8) | -15.9% (-20.6 to -11.2) |
| Middle-SDI quintile          | 14.1% (12.8 to 15.5) | 30.6% (29.2 to 31.9) | 10.2% (9.1 to 11.4)  | 27.2% (25.9 to 28.6) | -27.6% (-31.7 to -23.6) | -10.9% (-14.2 to -7.6)  |
| High-middle-SDI quintile     | 14.2% (13.0 to 15.5) | 34.9% (33.7 to 36.1) | 12.6% (11.5 to 13.7) | 31.7% (30.6 to 32.9) | -11.5% (-16.8 to -6.4)  | -9.0% (-11.2 to -6.9)   |
| High-SDI quintile            | 25.4% (23.9 to 27.1) | 35.0% (33.7 to 36.3) | 14.8% (13.7 to 16.0) | 22.2% (21.1 to 23.4) | -41.6% (-45.8 to -37.2) | -36.6% (-39.0 to -33.9) |
| <b>GBD regions</b>           |                      |                      |                      |                      |                         |                         |
| Central Sub-Saharan Africa   | 6.5% (5.5 to 7.5)    | 21.7% (19.3 to 24.2) | 5.2% (4.3 to 6.1)    | 17.2% (15.0 to 19.5) | -19.9% (-30.6 to -8.3)  | -21.1% (-31.7 to -8.4)  |
| Eastern Sub-Saharan Africa   | 6.9% (6.1 to 7.8)    | 18.9% (17.3 to 20.5) | 6.3% (5.5 to 7.1)    | 16.3% (15.0 to 17.6) | -9.3% (-18.0 to -0.3)   | -13.7% (-20.4 to -6.5)  |
| Southern Sub-Saharan Africa  | 21.6% (19.2 to 24.1) | 34.4% (32.3 to 36.4) | 12.4% (10.9 to 14.0) | 21.0% (19.3 to 22.7) | -42.5% (-50.0 to -34.2) | -38.9% (-43.8 to -33.6) |
| Western Sub-Saharan Africa   | 5.9% (5.0 to 6.8)    | 14.3% (13.2 to 15.4) | 4.6% (4.0 to 5.4)    | 12.1% (11.2 to 13.2) | -21.0% (-29.9 to -12.1) | -15.2% (-21.6 to -8.3)  |
| Andean Latin America         | 9.4% (8.2 to 10.8)   | 20.9% (19.4 to 22.5) | 6.4% (5.5 to 7.4)    | 14.9% (13.6 to 16.5) | -32.4% (-42.7 to -20.5) | -28.6% (-35.3 to -21.5) |
| Tropical Latin America       | 32.1% (28.6 to 35.6) | 38.5% (36.5 to 40.7) | 20.8% (18.4 to 23.1) | 25.2% (23.3 to 27.4) | -35.3% (-43.5 to -25.5) | -34.5% (-39.8 to -29.0) |
| Central Latin America        | 20.7% (18.8 to 23.0) | 31.3% (29.7 to 32.8) | 11.0% (9.9 to 12.3)  | 19.0% (17.5 to 20.6) | -46.8% (-52.5 to -40.4) | -39.2% (-43.7 to -34.6) |
| Southern Latin America       | 25.7% (23.2 to 28.7) | 33.1% (31.3 to 35.0) | 20.8% (19.0 to 22.7) | 25.5% (23.9 to 27.3) | -19.3% (-28.3 to -9.5)  | -22.9% (-27.8 to -17.7) |
| Caribbean                    | 19.1% (17.1 to 21.2) | 27.7% (26.0 to 29.4) | 15.6% (14.0 to 17.4) | 22.8% (21.2 to 24.5) | -18.0% (-27.0 to -7.4)  | -17.8% (-23.8 to -11.4) |
| Central Europe               | 23.1% (21.4 to 24.8) | 35.6% (34.3 to 37.0) | 17.4% (16.3 to 18.6) | 28.5% (27.3 to 29.7) | -24.5% (-29.2 to -19.7) | -20.0% (-22.3 to -17.7) |
| Eastern Europe               | 10.8% (9.6 to 12.1)  | 37.8% (36.2 to 39.2) | 10.4% (9.5 to 11.3)  | 37.3% (35.9 to 38.6) | -3.6% (-12.5 to 5.2)    | -1.2% (-4.3 to 2.0)     |
| North Africa and Middle East | 13.5% (12.2 to 15.0) | 32.2% (30.8 to 33.6) | 10.0% (8.9 to 11.2)  | 26.0% (24.6 to 27.4) | -26.0% (-30.6 to -21.2) | -19.3% (-22.7 to -16.1) |
| Central Asia                 | 9.0% (7.8 to 10.2)   | 31.0% (29.7 to 32.5) | 7.6% (6.7 to 8.7)    | 27.0% (25.5 to 28.3) | -15.2% (-20.0 to -10.1) | -13.2% (-17.4 to -9.0)  |
| South Asia                   | 12.3% (10.6 to 14.2) | 29.0% (26.9 to 31.6) | 8.8% (7.6 to 10.2)   | 22.7% (20.7 to 24.8) | -28.4% (-37.5 to -18.5) | -21.9% (-29.6 to -13.5) |
| Southeast Asia               | 15.3% (13.6 to 17.1) | 35.2% (33.6 to 36.7) | 12.6% (11.2 to 14.1) | 32.2% (30.6 to 33.9) | -17.3% (-23.2 to -10.7) | -8.4% (-12.0 to -4.6)   |
| East Asia                    | 15.7% (13.5 to 18.4) | 32.7% (30.8 to 34.7) | 13.0% (11.7 to 14.5) | 31.8% (30.3 to 33.2) | -17.2% (-27.4 to -5.7)  | -2.9% (-8.6 to 3.3)     |
| Oceania                      | 21.6% (18.1 to 25.3) | 34.0% (31.0 to 37.2) | 20.6% (17.3 to 24.1) | 31.9% (28.0 to 35.2) | -4.7% (-20.8 to 14.9)   | -6.4% (-16.9 to 5.2)    |
| High-income Asia Pacific     | 18.4% (16.7 to 20.3) | 37.5% (36.0 to 39.0) | 11.3% (10.3 to 12.4) | 26.3% (25.0 to 27.5) | -38.8% (-45.0 to -32.3) | -29.8% (-32.8 to -26.7) |
| High-income North America    | 32.4% (29.2 to 35.9) | 35.2% (33.0 to 37.4) | 15.9% (13.7 to 18.2) | 18.5% (16.6 to 20.4) | -50.8% (-58.1 to -42.4) | -47.5% (-52.8 to -41.7) |
| Western Europe               | 23.2% (21.7 to 24.9) | 34.2% (32.9 to 35.6) | 14.1% (13.1 to 15.1) | 22.2% (21.0 to 23.3) | -39.4% (-43.9 to -35.1) | -35.2% (-37.6 to -32.9) |
| Australasia                  | 26.4% (24.3 to 28.8) | 30.0% (28.4 to 31.6) | 14.6% (13.3 to 16.1) | 17.3% (16.2 to 18.6) | -44.6% (-49.8 to -39.0) | -42.2% (-45.7 to -38.5) |
| <b>High body-mass index</b>  |                      |                      |                      |                      |                         |                         |
| Global                       | 14.9% (8.5 to 22.7)  | 12.7% (6.5 to 20.8)  | 18.3% (11.5 to 26.3) | 16.8% (9.8 to 25.1)  | 23.1% (15.3 to 36.4)    | 32.2% (20.3 to 54.0)    |
| <b>SDI quintiles</b>         |                      |                      |                      |                      |                         |                         |
| Low-SDI quintile             | 5.7% (2.2 to 10.9)   | 4.4% (1.4 to 9.4)    | 10.0% (5.4 to 16.1)  | 8.2% (3.8 to 14.1)   | 77.7% (44.6 to 154.2)   | 87.8% (47.9 to 192.5)   |
| Low-middle-SDI quintile      | 10.1% (5.2 to 16.7)  | 8.0% (3.5 to 14.5)   | 17.5% (11.2 to 24.8) | 15.0% (8.7 to 22.6)  | 73.4% (46.4 to 122.5)   | 87.4% (52.6 to 156.0)   |
| Middle-SDI quintile          | 9.9% (5.0 to 16.8)   | 7.9% (3.3 to 14.5)   | 14.9% (9.0 to 22.2)  | 13.6% (7.7 to 21.1)  | 50.3% (31.3 to 82.0)    | 73.2% (44.0 to 133.2)   |
| High-middle-SDI quintile     | 17.6% (10.5 to 26.1) | 14.6% (7.8 to 23.1)  | 20.4% (12.7 to 29.3) | 19.0% (11.2 to 28.1) | 15.9% (8.0 to 27.4)     | 29.9% (18.3 to 53.3)    |
| High-SDI quintile            | 17.9% (10.7 to 26.3) | 17.6% (9.3 to 27.4)  | 21.6% (13.6 to 30.6) | 23.1% (13.8 to 33.1) | 20.4% (11.4 to 33.8)    | 31.2% (18.8 to 57.2)    |
| <b>GBD regions</b>           |                      |                      |                      |                      |                         |                         |
| Central Sub-Saharan Africa   | 7.5% (3.2 to 13.5)   | 8.0% (3.4 to 14.5)   | 9.9% (5.1 to 15.9)   | 10.4% (5.0 to 17.2)  | 32.2% (12.0 to 80.8)    | 30.3% (12.7 to 70.7)    |
| Eastern Sub-Saharan Africa   | 5.3% (1.7 to 11.0)   | 4.4% (1.2 to 10.0)   | 11.2% (6.2 to 17.6)  | 8.6% (3.7 to 15.2)   | 109.9% (55.6 to 270.8)  | 95.8% (47.7 to 247.7)   |
| Southern Sub-Saharan Africa  | 25.1% (17.1 to 34.1) | 14.8% (8.4 to 22.6)  | 28.0% (18.8 to 37.3) | 18.2% (11.0 to 26.6) | 11.5% (3.4 to 21.6)     | 23.0% (12.1 to 43.4)    |
| Western Sub-Saharan Africa   | 9.9% (4.8 to 16.4)   | 6.9% (2.6 to 13.1)   | 14.7% (8.5 to 22.1)  | 11.3% (5.7 to 18.4)  | 48.4% (28.2 to 95.0)    | 63.4% (37.4 to 129.9)   |
| Andean Latin America         | 12.8% (6.1 to 21.6)  | 12.8% (5.7 to 21.9)  | 21.5% (12.6 to 31.3) | 19.7% (10.8 to 30.0) | 68.6% (38.3 to 137.0)   | 54.1% (30.8 to 111.7)   |
| Tropical Latin America       | 16.1% (8.7 to 25.4)  | 15.1% (7.4 to 24.9)  | 26.2% (18.0 to 35.6) | 24.5% (15.6 to 34.6) | 62.5% (37.0 to 115.6)   | 62.0% (35.3 to 124.6)   |
| Central Latin America        | 18.7% (10.9 to 28.2) | 16.3% (8.6 to 25.8)  | 23.2% (14.2 to 33.0) | 22.0% (12.7 to 32.3) | 23.9% (12.8 to 41.9)    | 35.2% (21.6 to 62.1)    |
| Southern Latin America       | 12.7% (6.1 to 21.6)  | 14.2% (6.4 to 23.8)  | 21.3% (12.4 to 31.6) | 23.8% (14.0 to 34.4) | 67.4% (37.5 to 143.3)   | 67.8% (38.6 to 142.2)   |
| Caribbean                    | 17.0% (10.2 to 25.1) | 15.0% (8.4 to 23.1)  | 21.7% (13.8 to 30.5) | 21.2% (12.2 to 31.1) | 27.6% (16.9 to 44.0)    | 41.1% (27.0 to 69.8)    |
| Central Europe               | 20.9% (13.2 to 30.1) | 17.9% (9.9 to 27.7)  | 23.5% (14.6 to 33.1) | 23.2% (13.9 to 33.7) | 12.1% (2.3 to 25.9)     | 29.4% (16.4 to 52.8)    |
| Eastern Europe               | 20.2% (12.4 to 29.3) | 16.8% (9.5 to 25.3)  | 25.2% (16.0 to 34.9) | 23.4% (14.5 to 33.5) | 24.5% (13.8 to 41.1)    | 39.7% (18.0 to 73.5)    |
| North Africa and Middle East | 21.0% (13.2 to 29.9) | 16.8% (9.5 to 25.6)  | 27.3% (18.3 to 36.6) | 23.6% (14.3 to 33.7) | 30.0% (19.2 to 47.8)    | 40.5% (25.2 to 68.2)    |
| Central Asia                 | 20.5% (12.8 to 29.4) | 15.4% (8.2 to 24.2)  | 22.8% (14.4 to 32.3) | 18.0% (10.1 to 27.5) | 11.3% (3.6 to 21.7)     | 17.1% (7.4 to 34.0)     |
| South Asia                   | 4.7% (1.7 to 9.6)    | 4.0% (1.2 to 8.6)    | 12.8% (7.5 to 19.0)  | 11.2% (6.0 to 17.4)  | 170.9% (92.2 to 391.7)  | 182.8% (93.6 to 464.1)  |
| Southeast Asia               | 6.1% (2.4 to 11.6)   | 5.2% (1.8 to 10.7)   | 13.0% (7.7 to 19.3)  | 11.4% (6.1 to 18.0)  | 113.5% (63.7 to 239.5)  | 120.6% (64.0 to 280.0)  |
| East Asia                    | 6.1% (1.7 to 13.0)   | 5.4% (1.4 to 12.1)   | 11.0% (5.2 to 18.8)  | 10.5% (4.7 to 18.3)  | 79.3% (38.3 to 219.5)   | 93.0% (46.2 to 265.7)   |
| Oceania                      | 14.5% (7.0 to 24.6)  | 13.9% (5.9 to 24.7)  | 18.8% (10.7 to 28.2) | 19.0% (10.2 to 29.4) | 29.1% (13.0 to 63.6)    | 36.8% (18.2 to 87.9)    |
| High-income Asia Pacific     | 7.8% (2.8 to 15.1)   | 7.2% (2.2 to 14.7)   | 7.9% (2.9 to 14.9)   | 10.5% (4.2 to 18.5)  | 1.4% (-12.3 to 29.3)    | 45.9% (23.8 to 108.1)   |
| High-income North America    | 23.3% (14.8 to 32.1) | 21.0% (11.5 to 31.4) | 28.3% (18.7 to 37.6) | 29.2% (18.9 to 39.6) | 21.5% (13.5 to 33.4)    | 39.1% (23.0 to 70.0)    |
| Western Europe               | 15.6% (8.7 to 24.0)  | 17.4% (9.1 to 27.1)  | 17.6% (10.3 to 26.5) | 20.6% (11.5 to 30.8) | 12.6% (2.5 to 27.4)     | 17.9% (8.0 to 37.2)     |
| Australasia                  | 17.6% (10.1 to 26.9) | 17.6% (9.1 to 27.5)  | 21.9% (12.9 to 31.5) | 23.7% (14.0 to 33.8) | 24.2% (3.7 to 56.4)     | 34.8% (16.1 to 72.3)    |
| <b>Air pollution</b>         |                      |                      |                      |                      |                         |                         |
| Global                       | 14.9% (13.2 to 16.6) | 15.6% (13.8 to 17.4) | 14.4% (12.8 to 16.2) | 15.4% (13.7 to 17.2) | -3.0% (-5.5 to -0.5)    | -1.3% (-3.7 to 1.1)     |
| <b>SDI quintiles</b>         |                      |                      |                      |                      |                         |                         |
| Low-SDI quintile             | 26.7% (24.6 to 28.8) | 25.8% (23.7 to 28.1) | 23.5% (21.4 to 25.4) | 23.2% (21.1 to 25.3) | -12.0% (-15.1 to -9.0)  | -10.2% (-14.2 to -6.6)  |
| Low-middle-SDI quintile      | 22.8% (20.9 to 24.7) | 22.2% (20.3 to 24.4) | 18.5% (16.7 to 20.3) | 18.8% (16.9 to 20.8) | -18.7% (-22.5 to -15.3) | -15.3% (-19.8 to -11.0) |
| Middle-SDI quintile          | 18.4% (16.6 to 20.1) | 18.2% (16.4 to 20.1) | 14.6% (12.9 to 16.5) | 15.5% (13.6 to 17.4) | -20.3% (-24.3 to -16.6) | -14.9% (-18.8 to -11.1) |
| High-middle-SDI quintile     | 13.0% (11.3 to 14.9) | 14.5% (12.7 to 16.4) | 11.8% (10.1 to 13.6) | 13.5% (11.7 to 15.4) | -9.3% (-14.7 to -4.1)   | -6.5% (-11.1 to -1.3)   |
| High-SDI quintile            | 9.6% (8.0 to 11.5)   | 10.7% (8.9 to 12.6)  | 8.1% (6.5 to 9.7)    | 9.1% (7.4 to 10.8)   | -16.3% (-21.9 to -11.3) | -14.9% (-20.2 to -10.4) |
| <b>GBD regions</b>           |                      |                      |                      |                      |                         |                         |

|                                 |                      |                      |                      |                      |                         |                         |
|---------------------------------|----------------------|----------------------|----------------------|----------------------|-------------------------|-------------------------|
| Central Sub-Saharan Africa      | 24.7% (22.2 to 27.2) | 24.3% (21.6 to 27.1) | 22.0% (19.6 to 24.5) | 21.8% (19.3 to 24.4) | -11.1% (-18.0 to -3.5)  | -10.3% (-17.7 to -1.4)  |
| Eastern Sub-Saharan Africa      | 23.6% (21.5 to 25.7) | 22.8% (20.6 to 25.0) | 22.3% (20.2 to 24.3) | 21.7% (19.6 to 24.0) | -5.9% (-9.4 to -2.4)    | -4.4% (-8.2 to -0.5)    |
| Southern Sub-Saharan Africa     | 17.3% (15.4 to 19.3) | 17.1% (15.2 to 19.2) | 14.4% (12.6 to 16.2) | 14.5% (12.7 to 16.5) | -16.8% (-22.3 to -11.7) | -15.1% (-20.9 to -9.8)  |
| Western Sub-Saharan Africa      | 24.0% (21.8 to 26.4) | 22.5% (20.2 to 25.1) | 21.1% (19.0 to 23.5) | 20.4% (18.1 to 23.2) | -12.2% (-18.1 to -5.4)  | -9.4% (-16.8 to 0.4)    |
| Andean Latin America            | 16.6% (14.6 to 18.7) | 16.2% (14.2 to 18.4) | 12.2% (9.7 to 14.6)  | 12.7% (10.0 to 15.3) | -26.8% (-38.8 to -17.3) | -21.8% (-35.1 to -11.2) |
| Tropical Latin America          | 13.4% (11.5 to 15.3) | 14.0% (12.1 to 15.9) | 10.1% (8.4 to 11.9)  | 10.9% (9.0 to 12.9)  | -24.3% (-32.6 to -16.4) | -22.5% (-30.8 to -14.9) |
| Central Latin America           | 14.5% (12.6 to 16.4) | 14.8% (12.8 to 16.8) | 11.7% (9.7 to 13.6)  | 12.6% (10.4 to 14.6) | -19.6% (-28.2 to -12.2) | -14.7% (-24.0 to -6.8)  |
| Southern Latin America          | 10.7% (7.8 to 13.6)  | 12.0% (8.8 to 15.4)  | 9.3% (6.2 to 12.3)   | 10.6% (7.2 to 13.9)  | -13.1% (-44.4 to 24.6)  | -11.2% (-41.6 to 26.4)  |
| Caribbean                       | 14.6% (12.2 to 16.9) | 13.9% (11.3 to 16.5) | 13.4% (10.8 to 15.7) | 12.8% (10.2 to 15.4) | -8.5% (-21.9 to 5.7)    | -7.9% (-23.1 to 9.0)    |
| Central Europe                  | 13.2% (11.3 to 15.2) | 14.2% (12.2 to 16.4) | 10.5% (8.8 to 12.2)  | 11.8% (10.0 to 13.7) | -20.6% (-26.6 to -14.7) | -17.3% (-23.7 to -11.1) |
| Eastern Europe                  | 11.0% (9.0 to 13.1)  | 12.4% (10.4 to 14.6) | 9.7% (7.9 to 11.7)   | 11.3% (9.3 to 13.6)  | -11.6% (-22.4 to 0.4)   | -9.3% (-20.5 to 3.3)    |
| North Africa and Middle East    | 18.0% (16.1 to 20.1) | 18.4% (16.4 to 20.5) | 16.2% (14.3 to 18.2) | 16.8% (14.8 to 18.9) | -9.8% (-16.6 to -3.4)   | -8.4% (-16.0 to -1.1)   |
| Central Asia                    | 14.8% (12.4 to 17.1) | 15.4% (12.8 to 17.9) | 12.3% (9.6 to 14.8)  | 12.9% (10.2 to 15.5) | -17.0% (-31.9 to -3.0)  | -16.5% (-31.9 to -1.8)  |
| South Asia                      | 25.2% (23.2 to 27.1) | 24.4% (22.4 to 26.7) | 19.8% (17.9 to 21.7) | 20.2% (18.2 to 22.2) | -21.5% (-25.0 to -18.3) | -17.3% (-20.9 to -13.8) |
| Southeast Asia                  | 19.9% (17.9 to 21.8) | 19.0% (17.1 to 21.1) | 14.7% (12.9 to 16.4) | 14.8% (13.0 to 16.8) | -26.1% (-31.0 to -21.9) | -22.0% (-27.1 to -17.0) |
| East Asia                       | 20.3% (18.5 to 22.1) | 19.8% (17.9 to 21.6) | 15.0% (13.2 to 16.8) | 15.9% (14.1 to 17.7) | -26.5% (-30.8 to -22.7) | -19.6% (-23.8 to -15.6) |
| Oceania                         | 23.1% (20.5 to 25.6) | 23.1% (20.3 to 26.0) | 19.7% (17.0 to 22.2) | 20.0% (17.2 to 22.9) | -14.9% (-23.2 to -5.1)  | -13.3% (-22.3 to -3.2)  |
| High-income Asia Pacific        | 10.0% (8.4 to 11.6)  | 11.0% (9.4 to 12.6)  | 8.5% (7.0 to 10.0)   | 9.9% (8.4 to 11.5)   | -14.7% (-19.2 to -10.2) | -9.4% (-13.0 to -5.8)   |
| High-income North America       | 8.2% (6.6 to 10.1)   | 9.1% (7.2 to 10.9)   | 6.8% (4.9 to 8.5)    | 7.4% (5.4 to 9.3)    | -17.6% (-28.7 to -10.8) | -18.2% (-29.4 to -11.4) |
| Western Europe                  | 9.8% (8.0 to 11.7)   | 10.9% (9.1 to 12.9)  | 8.1% (6.5 to 9.8)    | 9.2% (7.5 to 11.0)   | -17.5% (-24.4 to -10.3) | -15.5% (-21.9 to -9.3)  |
| Australasia                     | 7.7% (4.1 to 11.1)   | 8.6% (4.3 to 12.2)   | 5.9% (1.9 to 9.3)    | 6.9% (2.3 to 11.0)   | -23.9% (-72.3 to 40.1)  | -20.2% (-71.4 to 48.3)  |
| <b>Low physical activity</b>    |                      |                      |                      |                      |                         |                         |
| Global                          | 11.0% (5.2 to 18.3)  | 10.0% (4.7 to 16.8)  | 10.6% (5.0 to 17.7)  | 9.6% (4.5 to 16.1)   | -3.9% (-6.1 to -1.8)    | -4.2% (-5.9 to -2.4)    |
| SDI quintiles                   |                      |                      |                      |                      |                         |                         |
| Low-SDI quintile                | 9.6% (4.5 to 16.2)   | 8.7% (4.0 to 14.6)   | 9.5% (4.5 to 15.8)   | 8.5% (3.9 to 14.3)   | -1.7% (-3.8 to 0.0)     | -1.9% (-4.1 to -0.2)    |
| Low-middle-SDI quintile         | 10.1% (4.8 to 17.0)  | 9.5% (4.4 to 15.9)   | 10.1% (4.8 to 17.0)  | 9.4% (4.4 to 15.7)   | 0.3% (-1.2 to 1.7)      | -1.4% (-2.9 to -0.1)    |
| Middle-SDI quintile             | 9.8% (4.6 to 16.4)   | 9.1% (4.2 to 15.2)   | 9.9% (4.6 to 16.5)   | 9.0% (4.2 to 15.1)   | 1.4% (0.3 to 2.8)       | -1.4% (-2.7 to -0.4)    |
| High-middle-SDI quintile        | 11.5% (5.4 to 19.0)  | 10.5% (4.9 to 17.4)  | 11.2% (5.2 to 18.6)  | 10.3% (4.9 to 17.2)  | -2.6% (-4.8 to -0.6)    | -1.6% (-3.0 to -0.4)    |
| High-SDI quintile               | 11.8% (5.6 to 19.6)  | 10.5% (5.0 to 17.5)  | 11.9% (5.6 to 19.6)  | 10.4% (4.9 to 17.4)  | 0.6% (-0.1 to 1.4)      | -0.6% (-1.5 to 0.0)     |
| GBD regions                     |                      |                      |                      |                      |                         |                         |
| Central Sub-Saharan Africa      | 10.2% (4.8 to 17.0)  | 8.2% (3.7 to 13.9)   | 10.3% (4.8 to 17.2)  | 8.4% (3.8 to 14.3)   | 0.7% (-1.4 to 2.9)      | 2.6% (0.3 to 5.6)       |
| Eastern Sub-Saharan Africa      | 8.5% (3.9 to 14.3)   | 8.9% (4.2 to 14.9)   | 7.9% (3.6 to 13.4)   | 8.5% (3.9 to 14.2)   | -7.0% (-13.7 to -2.7)   | -4.7% (-9.4 to -0.9)    |
| Southern Sub-Saharan Africa     | 10.7% (5.1 to 17.8)  | 9.6% (4.5 to 16.1)   | 10.8% (5.1 to 17.8)  | 9.9% (4.7 to 16.5)   | 0.2% (-2.1 to 2.6)      | 2.8% (0.8 to 5.4)       |
| Western Sub-Saharan Africa      | 8.7% (4.0 to 15.0)   | 8.6% (3.8 to 14.7)   | 8.9% (4.1 to 15.2)   | 8.7% (3.9 to 14.8)   | 1.7% (-0.6 to 4.5)      | 1.4% (-0.5 to 4.0)      |
| Andean Latin America            | 9.1% (4.1 to 15.3)   | 10.5% (4.9 to 17.6)  | 9.2% (4.2 to 15.5)   | 10.8% (5.1 to 17.9)  | 1.2% (-0.7 to 3.4)      | 2.4% (0.5 to 5.1)       |
| Tropical Latin America          | 13.8% (6.2 to 22.4)  | 12.2% (5.7 to 20.2)  | 13.7% (6.2 to 22.2)  | 12.2% (5.7 to 20.0)  | -0.7% (-1.7 to 0.1)     | 0.0% (-0.7 to 0.9)      |
| Central Latin America           | 9.9% (4.7 to 16.6)   | 8.7% (3.9 to 14.6)   | 10.0% (4.7 to 16.6)  | 8.9% (4.1 to 14.9)   | 0.5% (-0.9 to 2.1)      | 2.6% (1.2 to 4.5)       |
| Southern Latin America          | 9.2% (4.2 to 15.3)   | 8.0% (3.6 to 13.5)   | 9.2% (4.3 to 15.5)   | 8.0% (3.6 to 13.6)   | 0.2% (-2.6 to 3.2)      | 0.3% (-2.2 to 2.9)      |
| Caribbean                       | 13.0% (6.0 to 21.4)  | 12.0% (5.6 to 19.8)  | 12.8% (6.0 to 21.0)  | 12.2% (5.7 to 20.1)  | -1.8% (-4.0 to -0.1)    | 1.6% (0.0 to 3.6)       |
| Central Europe                  | 11.1% (5.2 to 18.4)  | 8.5% (3.8 to 14.2)   | 11.3% (5.3 to 18.8)  | 8.7% (3.9 to 14.6)   | 2.3% (0.9 to 4.2)       | 2.2% (0.8 to 4.3)       |
| Eastern Europe                  | 12.1% (5.6 to 19.8)  | 11.6% (5.3 to 19.0)  | 11.9% (5.5 to 19.5)  | 11.4% (5.3 to 18.8)  | -1.6% (-3.2 to -0.3)    | -1.8% (-3.3 to -0.5)    |
| North Africa and Middle East    | 12.6% (5.9 to 20.7)  | 12.1% (5.6 to 19.8)  | 12.8% (5.9 to 21.0)  | 12.3% (5.8 to 20.2)  | 1.7% (0.3 to 3.4)       | 2.1% (0.6 to 3.8)       |
| Central Asia                    | 9.7% (4.6 to 16.3)   | 8.7% (3.9 to 14.6)   | 9.9% (4.6 to 16.5)   | 9.0% (4.1 to 15.0)   | 2.0% (0.3 to 4.3)       | 3.4% (1.4 to 6.0)       |
| South Asia                      | 10.0% (4.7 to 16.7)  | 8.6% (3.9 to 14.5)   | 10.2% (4.8 to 17.0)  | 8.7% (4.0 to 14.5)   | 2.4% (1.0 to 4.3)       | 0.6% (-0.7 to 2.1)      |
| Southeast Asia                  | 7.7% (3.4 to 13.2)   | 8.2% (3.7 to 13.8)   | 7.9% (3.5 to 13.5)   | 8.4% (3.8 to 14.1)   | 2.9% (1.3 to 5.5)       | 2.5% (0.9 to 4.7)       |
| East Asia                       | 9.2% (4.2 to 15.4)   | 8.6% (3.9 to 14.5)   | 9.6% (4.5 to 16.2)   | 8.7% (3.9 to 14.7)   | 5.0% (2.6 to 8.2)       | 1.2% (0.1 to 2.5)       |
| Oceania                         | 12.9% (6.1 to 21.0)  | 10.6% (5.0 to 17.6)  | 12.9% (6.0 to 21.1)  | 10.6% (5.0 to 17.5)  | -0.1% (-1.9 to 1.7)     | 0.1% (-1.9 to 2.1)      |
| High-income Asia Pacific        | 13.0% (6.0 to 21.4)  | 11.7% (5.5 to 19.4)  | 13.1% (6.0 to 21.5)  | 10.7% (5.0 to 17.7)  | 0.7% (-0.3 to 1.7)      | -9.1% (-14.2 to -4.4)   |
| High-income North America       | 11.8% (5.6 to 19.4)  | 10.3% (4.8 to 17.1)  | 11.4% (5.4 to 19.0)  | 10.0% (4.7 to 16.8)  | -2.8% (-4.6 to -1.2)    | -2.3% (-4.2 to -0.9)    |
| Western Europe                  | 11.9% (5.6 to 19.7)  | 10.9% (5.1 to 18.0)  | 12.2% (5.7 to 20.1)  | 11.1% (5.3 to 18.5)  | 2.4% (0.9 to 4.2)       | 2.6% (1.1 to 4.4)       |
| Australasia                     | 13.5% (6.1 to 22.0)  | 12.3% (5.7 to 20.2)  | 13.6% (6.1 to 22.0)  | 12.6% (5.9 to 20.7)  | 1.1% (-1.1 to 3.5)      | 2.9% (0.7 to 6.3)       |
| <b>Impaired kidney function</b> |                      |                      |                      |                      |                         |                         |
| Global                          | 12.5% (10.2 to 14.9) | 9.2% (7.6 to 11.0)   | 11.6% (9.4 to 13.9)  | 8.7% (7.1 to 10.3)   | -7.2% (-11.5 to -3.0)   | -5.8% (-10.3 to -1.1)   |
| SDI quintiles                   |                      |                      |                      |                      |                         |                         |
| Low-SDI quintile                | 12.8% (10.7 to 15.1) | 9.2% (7.7 to 10.9)   | 12.6% (10.3 to 14.8) | 9.2% (7.7 to 10.8)   | -2.0% (-7.0 to 3.5)     | -0.2% (-5.1 to 4.9)     |
| Low-middle-SDI quintile         | 12.6% (10.4 to 14.7) | 9.4% (7.8 to 11.1)   | 12.3% (10.1 to 14.5) | 9.4% (7.8 to 11.1)   | -2.2% (-6.7 to 1.8)     | -0.1% (-4.4 to 4.7)     |
| Middle-SDI quintile             | 11.1% (9.0 to 13.2)  | 8.6% (7.0 to 10.2)   | 10.1% (7.9 to 12.2)  | 7.9% (6.4 to 9.4)    | -9.3% (-14.1 to -5.1)   | -8.1% (-12.4 to -3.8)   |
| High-middle-SDI quintile        | 12.9% (10.4 to 15.7) | 9.0% (7.3 to 10.8)   | 11.9% (9.3 to 14.6)  | 8.2% (6.6 to 9.9)    | -7.8% (-12.3 to -3.4)   | -8.8% (-13.2 to -4.4)   |
| High-SDI quintile               | 12.6% (10.3 to 15.2) | 9.2% (7.6 to 11.0)   | 12.6% (10.0 to 15.4) | 9.3% (7.5 to 11.2)   | -0.4% (-7.1 to 5.9)     | 0.4% (-6.2 to 7.3)      |
| GBD regions                     |                      |                      |                      |                      |                         |                         |
| Central Sub-Saharan Africa      | 15.0% (12.3 to 17.7) | 10.0% (8.2 to 11.8)  | 14.9% (12.2 to 17.7) | 10.0% (8.2 to 11.8)  | -0.4% (-6.2 to 5.9)     | -0.3% (-6.9 to 6.6)     |
| Eastern Sub-Saharan Africa      | 14.2% (11.7 to 16.7) | 9.4% (7.8 to 11.1)   | 14.4% (11.8 to 17.1) | 9.4% (7.8 to 11.2)   | 1.9% (-3.3 to 8.1)      | 0.1% (-4.5 to 5.2)      |
| Southern Sub-Saharan Africa     | 14.5% (11.9 to 17.0) | 10.1% (8.4 to 11.9)  | 15.3% (12.5 to 18.1) | 10.7% (8.8 to 12.9)  | 5.7% (1.3 to 10.0)      | 6.0% (1.5 to 10.3)      |
| Western Sub-Saharan Africa      | 16.0% (13.3 to 18.9) | 11.0% (9.0 to 13.2)  | 16.0% (13.2 to 18.8) | 11.1% (9.0 to 13.2)  | -0.3% (-4.7 to 4.5)     | 0.6% (-4.8 to 7.1)      |
| Andean Latin America            | 11.3% (9.3 to 13.6)  | 9.4% (7.7 to 11.1)   | 12.2% (9.8 to 14.7)  | 9.9% (8.1 to 11.8)   | 7.6% (1.8 to 14.0)      | 5.1% (-2.3 to 13.2)     |

|                              |                        |                       |                        |                        |                          |                             |
|------------------------------|------------------------|-----------------------|------------------------|------------------------|--------------------------|-----------------------------|
| Tropical Latin America       | 11.7% (9.7 to 14.0)    | 9.3% (7.8 to 10.9)    | 11.6% (9.5 to 13.8)    | 8.9% (7.4 to 10.6)     | -1.4% (-6.5 to 4.1)      | -4.4% (-9.1 to 1.2)         |
| Central Latin America        | 13.8% (11.4 to 16.4)   | 12.3% (10.2 to 14.5)  | 14.8% (11.9 to 17.6)   | 13.1% (10.8 to 15.4)   | 6.8% (2.3 to 11.5)       | 6.0% (1.5 to 11.0)          |
| Southern Latin America       | 11.9% (9.4 to 14.5)    | 8.0% (6.4 to 9.6)     | 12.4% (9.8 to 15.2)    | 8.3% (6.8 to 10.1)     | 4.3% (-5.0 to 13.9)      | 3.9% (-5.4 to 14.0)         |
| Caribbean                    | 12.0% (9.8 to 14.3)    | 9.9% (8.2 to 11.7)    | 12.3% (10.1 to 14.6)   | 9.9% (8.2 to 11.8)     | 2.0% (-4.6 to 9.0)       | 0.2% (-6.6 to 8.1)          |
| Central Europe               | 11.7% (9.3 to 14.3)    | 7.8% (6.3 to 9.4)     | 11.9% (9.3 to 14.8)    | 7.7% (6.1 to 9.5)      | 2.3% (-6.4 to 10.9)      | -1.5% (-8.9 to 6.4)         |
| Eastern Europe               | 14.2% (11.3 to 17.2)   | 10.3% (8.4 to 12.3)   | 15.0% (12.0 to 18.0)   | 10.6% (8.6 to 12.5)    | 5.8% (1.2 to 10.7)       | 2.7% (-1.9 to 8.0)          |
| North Africa and Middle East | 15.5% (13.0 to 18.2)   | 10.8% (9.0 to 12.7)   | 15.8% (13.0 to 18.6)   | 11.2% (9.1 to 13.2)    | 2.0% (-2.6 to 6.5)       | 3.0% (-2.4 to 8.6)          |
| Central Asia                 | 13.0% (10.5 to 15.5)   | 8.7% (7.1 to 10.4)    | 13.9% (11.1 to 16.7)   | 9.5% (7.6 to 11.5)     | 7.0% (3.0 to 11.4)       | 9.1% (4.2 to 14.4)          |
| South Asia                   | 11.0% (9.1 to 13.1)    | 8.9% (7.4 to 10.4)    | 11.4% (9.2 to 13.5)    | 9.1% (7.5 to 10.8)     | 3.1% (-2.2 to 8.3)       | 2.5% (-2.1 to 7.3)          |
| Southeast Asia               | 10.6% (8.6 to 12.7)    | 7.8% (6.3 to 9.3)     | 10.9% (8.7 to 13.1)    | 8.2% (6.6 to 9.8)      | 3.1% (-1.8 to 8.1)       | 4.9% (0.0 to 10.1)          |
| East Asia                    | 8.0% (6.2 to 9.9)      | 5.5% (4.3 to 6.8)     | 6.3% (4.6 to 8.2)      | 4.7% (3.5 to 5.9)      | -20.5% (-28.7 to -13.5)  | -15.3% (-21.6 to -10.0)     |
| Oceania                      | 10.3% (8.4 to 12.1)    | 8.3% (6.9 to 9.6)     | 10.9% (9.0 to 12.9)    | 8.8% (7.3 to 10.2)     | 6.4% (0.8 to 12.7)       | 5.8% (1.8 to 10.5)          |
| High-income Asia Pacific     | 10.4% (8.1 to 13.0)    | 8.3% (6.6 to 10.2)    | 10.6% (8.1 to 13.5)    | 8.2% (6.5 to 10.0)     | 1.8% (-7.1 to 10.3)      | -1.8% (-9.1 to 5.5)         |
| High-income North America    | 14.1% (11.5 to 16.7)   | 11.0% (9.1 to 13.1)   | 14.0% (11.4 to 16.8)   | 11.5% (9.5 to 13.7)    | -0.6% (-7.6 to 6.1)      | 3.9% (-3.7 to 11.6)         |
| Western Europe               | 12.1% (9.7 to 14.7)    | 8.3% (6.8 to 10.0)    | 12.7% (9.9 to 15.7)    | 8.5% (6.8 to 10.5)     | 5.0% (-2.5 to 12.4)      | 2.2% (-4.5 to 9.1)          |
| Australasia                  | 11.9% (9.4 to 14.6)    | 8.2% (6.5 to 9.9)     | 13.3% (10.2 to 16.6)   | 8.7% (6.8 to 10.8)     | 11.0% (-0.8 to 22.9)     | 5.9% (-7.4 to 19.2)         |
| <b>Lead exposure</b>         |                        |                       |                        |                        |                          |                             |
| Global                       | 3.2% (1.8 to 5.1)      | 5.3% (3.4 to 7.4)     | 4.3% (2.6 to 6.4)      | 6.4% (4.3 to 8.8)      | 31.0% (21.0 to 48.8)     | 21.4% (15.5 to 31.0)        |
| SDI quintiles                |                        |                       |                        |                        |                          |                             |
| Low-SDI quintile             | 7.3% (5.1 to 9.9)      | 10.5% (7.9 to 13.5)   | 8.2% (5.7 to 11.1)     | 11.6% (8.7 to 14.9)    | 12.4% (6.6 to 19.8)      | 10.0% (5.1 to 15.2)         |
| Low-middle-SDI quintile      | 5.8% (3.7 to 8.0)      | 8.4% (6.0 to 10.9)    | 6.5% (4.3 to 9.0)      | 8.7% (6.2 to 11.5)     | 11.9% (5.6 to 20.5)      | 3.7% (-0.7 to 8.5)          |
| Middle-SDI quintile          | 4.4% (2.5 to 6.5)      | 6.6% (4.5 to 9.0)     | 5.0% (3.0 to 7.4)      | 7.3% (5.0 to 10.1)     | 14.6% (5.7 to 26.6)      | 11.2% (4.5 to 18.2)         |
| High-middle-SDI quintile     | 2.0% (0.9 to 3.6)      | 3.7% (2.1 to 5.6)     | 2.8% (1.4 to 4.7)      | 4.7% (2.9 to 6.9)      | 39.6% (22.1 to 73.5)     | 27.3% (15.3 to 45.5)        |
| High-SDI quintile            | 2.2% (0.9 to 4.0)      | 3.6% (1.9 to 5.6)     | 2.0% (0.7 to 3.8)      | 3.1% (1.5 to 5.1)      | -7.0% (-17.4 to -1.6)    | -13.8% (-24.1 to -7.7)      |
| GBD regions                  |                        |                       |                        |                        |                          |                             |
| Central Sub-Saharan Africa   | 2.3% (0.7 to 4.1)      | 3.6% (1.8 to 5.7)     | 2.7% (1.1 to 4.6)      | 4.0% (2.2 to 6.1)      | 18.5% (7.8 to 56.2)      | 11.1% (3.5 to 27.6)         |
| Eastern Sub-Saharan Africa   | 4.2% (2.4 to 6.4)      | 8.3% (6.0 to 11.2)    | 4.1% (2.2 to 6.3)      | 7.3% (5.0 to 10.2)     | -3.3% (-9.8 to 1.7)      | -11.9% (-17.9 to -7.6)      |
| Southern Sub-Saharan Africa  | 2.5% (1.0 to 4.4)      | 4.2% (2.3 to 6.2)     | 2.9% (1.3 to 4.9)      | 4.2% (2.3 to 6.3)      | 15.7% (6.2 to 39.2)      | 0.7% (-6.5 to 9.1)          |
| Western Sub-Saharan Africa   | 3.4% (1.7 to 5.3)      | 5.0% (3.0 to 7.1)     | 4.3% (2.4 to 6.5)      | 6.0% (3.9 to 8.6)      | 26.0% (13.9 to 50.8)     | 21.9% (13.1 to 36.2)        |
| Andean Latin America         | 2.9% (1.2 to 4.8)      | 4.3% (2.4 to 6.4)     | 3.1% (1.4 to 5.2)      | 4.5% (2.6 to 6.8)      | 9.6% (1.4 to 28.8)       | 6.3% (-0.5 to 16.2)         |
| Tropical Latin America       | 4.7% (2.7 to 6.9)      | 6.2% (4.1 to 8.6)     | 4.7% (2.7 to 6.9)      | 5.8% (3.8 to 8.2)      | 0.1% (-2.8 to 3.5)       | -6.9% (-11.0 to -4.0)       |
| Central Latin America        | 5.6% (3.5 to 8.2)      | 8.3% (5.9 to 11.1)    | 5.8% (3.6 to 8.6)      | 7.9% (5.5 to 10.8)     | 4.5% (-2.8 to 11.4)      | -4.8% (-10.1 to -0.8)       |
| Southern Latin America       | 1.3% (0.2 to 2.9)      | 2.4% (0.9 to 4.3)     | 1.6% (0.4 to 3.3)      | 2.8% (1.1 to 4.8)      | 24.9% (10.7 to 82.7)     | 14.7% (3.0 to 42.4)         |
| Caribbean                    | 4.8% (2.9 to 7.0)      | 7.5% (5.2 to 10.1)    | 5.6% (3.5 to 8.1)      | 8.3% (5.9 to 11.2)     | 17.1% (9.6 to 30.1)      | 11.3% (5.6 to 18.4)         |
| Central Europe               | 1.2% (0.2 to 2.8)      | 2.8% (1.2 to 4.8)     | 1.5% (0.3 to 3.1)      | 3.0% (1.4 to 5.0)      | 17.5% (4.6 to 74.6)      | 7.5% (-1.0 to 23.4)         |
| Eastern Europe               | 0.7% (0.0 to 2.0)      | 1.1% (0.1 to 2.7)     | 0.8% (0.1 to 2.2)      | 1.3% (0.2 to 2.9)      | 13.4% (4.0 to 81.2)      | 15.3% (5.5 to 69.0)         |
| North Africa and Middle East | 6.4% (4.3 to 8.8)      | 8.7% (6.3 to 11.2)    | 6.4% (4.2 to 9.0)      | 8.6% (6.1 to 11.5)     | -0.2% (-6.2 to 5.6)      | -1.1% (-7.0 to 4.8)         |
| Central Asia                 | 1.8% (0.5 to 3.5)      | 3.4% (1.6 to 5.4)     | 2.2% (0.7 to 4.0)      | 3.6% (1.8 to 5.7)      | 19.3% (8.5 to 54.8)      | 7.7% (-0.7 to 21.1)         |
| South Asia                   | 6.7% (4.6 to 9.2)      | 8.9% (6.6 to 11.6)    | 7.3% (5.0 to 10.1)     | 9.4% (6.9 to 12.4)     | 8.3% (2.0 to 15.3)       | 5.7% (0.1 to 11.4)          |
| Southeast Asia               | 2.7% (1.1 to 4.5)      | 4.6% (2.7 to 6.7)     | 2.9% (1.3 to 4.9)      | 4.9% (2.9 to 7.1)      | 8.9% (1.0 to 22.9)       | 7.1% (2.1 to 14.3)          |
| East Asia                    | 5.4% (3.4 to 7.9)      | 8.2% (5.9 to 11.0)    | 5.8% (3.6 to 8.5)      | 8.6% (5.9 to 11.7)     | 6.1% (-3.2 to 15.3)      | 4.1% (-3.1 to 10.5)         |
| Oceania                      | 1.2% (0.2 to 2.7)      | 2.0% (0.7 to 3.8)     | 1.2% (0.2 to 2.7)      | 1.8% (0.6 to 3.6)      | -0.9% (-9.5 to 24.1)     | -9.3% (-19.0 to -2.2)       |
| High-income Asia Pacific     | 1.7% (0.4 to 3.4)      | 2.4% (0.9 to 4.3)     | 1.3% (0.3 to 2.9)      | 1.8% (0.5 to 3.6)      | -19.5% (-33.2 to -12.0)  | -24.0% (-38.7 to -15.6)     |
| High-income North America    | 2.9% (1.3 to 4.9)      | 4.5% (2.5 to 6.8)     | 2.3% (0.8 to 4.1)      | 3.4% (1.6 to 5.4)      | -22.7% (-40.7 to -13.1)  | -24.9% (-38.6 to -16.8)     |
| Western Europe               | 2.0% (0.8 to 3.7)      | 3.4% (1.7 to 5.4)     | 2.2% (0.9 to 4.0)      | 3.2% (1.5 to 5.2)      | 8.7% (-2.4 to 24.3)      | -7.1% (-17.1 to 0.9)        |
| Australasia                  | 3.3% (1.6 to 5.4)      | 4.8% (2.8 to 6.9)     | 3.2% (1.6 to 5.4)      | 4.5% (2.6 to 6.9)      | -2.8% (-15.1 to 6.9)     | -5.7% (-16.4 to 2.7)        |
| <b>Alcohol use</b>           |                        |                       |                        |                        |                          |                             |
| Global                       | -5.5% (-9.4 to -1.5)   | -2.1% (-6.8 to 2.6)   | -3.6% (-6.2 to -0.9)   | 0.1% (-4.1 to 4.2)     | -34.5% (-44.2 to -25.3)  | -104.8% (-882.0 to 636.9)   |
| SDI quintiles                |                        |                       |                        |                        |                          |                             |
| Low-SDI quintile             | -1.8% (-3.1 to -0.5)   | -0.7% (-2.5 to 1.3)   | -1.6% (-2.8 to -0.5)   | 0.5% (-1.8 to 3.0)     | -10.9% (-30.8 to 18.5)   | -173.4% (-1507.0 to 1310.5) |
| Low-middle-SDI quintile      | -1.3% (-2.4 to -0.3)   | -0.5% (-2.5 to 1.7)   | -0.9% (-1.7 to -0.1)   | 1.3% (-1.2 to 4.1)     | -29.8% (-70.6 to -10.9)  | -368.1% (-3084.2 to 1513.4) |
| Middle-SDI quintile          | -2.2% (-3.6 to -0.7)   | -1.6% (-5.0 to 1.7)   | -1.6% (-2.8 to -0.4)   | 1.3% (-2.5 to 5.3)     | -26.5% (-52.8 to -15.4)  | -180.0% (-2180.9 to 1543.2) |
| High-middle-SDI quintile     | -5.3% (-8.7 to -1.5)   | -1.6% (-7.0 to 3.6)   | -3.5% (-6.6 to -0.5)   | 2.5% (-3.1 to 8.4)     | -33.8% (-79.1 to -15.0)  | -257.4% (-1692.8 to 2309.3) |
| High-SDI quintile            | -9.0% (-15.6 to -1.9)  | -3.3% (-9.9 to 3.6)   | -9.6% (-16.2 to -3.1)  | -6.2% (-13.2 to 1.0)   | 7.7% (-9.7 to 66.0)      | 86.2% (-729.2 to 909.9)     |
| GBD regions                  |                        |                       |                        |                        |                          |                             |
| Central Sub-Saharan Africa   | -4.4% (-7.2 to -1.6)   | -6.1% (-9.9 to -2.3)  | -4.4% (-7.3 to -1.3)   | -6.0% (-10.1 to -1.8)  | -0.8% (-38.0 to 24.5)    | -2.8% (-43.4 to 29.5)       |
| Eastern Sub-Saharan Africa   | -3.2% (-5.9 to -0.3)   | -3.0% (-6.3 to 0.6)   | -4.0% (-6.9 to -1.0)   | -4.4% (-8.1 to -0.6)   | 25.6% (-11.4 to 128.5)   | 45.8% (-249.6 to 358.8)     |
| Southern Sub-Saharan Africa  | 2.8% (-1.3 to 7.8)     | 2.9% (-1.3 to 8.0)    | 2.2% (-1.9 to 7.4)     | 2.5% (-1.7 to 7.4)     | -21.7% (-320.9 to 249.7) | -14.8% (-316.1 to 176.0)    |
| Western Sub-Saharan Africa   | -4.8% (-8.3 to -1.4)   | -0.9% (-4.4 to 3.1)   | -4.3% (-7.4 to -1.2)   | -2.9% (-6.4 to 0.7)    | -10.9% (-44.4 to 26.2)   | 243.1% (-1587.3 to 2192.7)  |
| Andean Latin America         | -7.6% (-12.4 to -2.4)  | -5.0% (-12.0 to 1.9)  | -6.7% (-11.1 to -2.3)  | -5.8% (-12.2 to 1.0)   | -11.6% (-37.8 to 35.4)   | 15.5% (-329.6 to 363.9)     |
| Tropical Latin America       | -5.1% (-8.3 to -2.0)   | -8.1% (-13.6 to -2.4) | -3.7% (-6.6 to -0.7)   | -4.9% (-11.2 to 1.5)   | -26.7% (-73.3 to -0.7)   | -39.5% (-152.2 to -2.6)     |
| Central Latin America        | -3.5% (-6.0 to -1.0)   | 4.1% (-1.8 to 10.6)   | -3.5% (-5.8 to -1.4)   | 2.5% (-3.5 to 9.3)     | 0.0% (-15.0 to 47.3)     | -39.1% (-289.6 to 226.5)    |
| Southern Latin America       | -14.2% (-24.2 to -4.2) | -6.2% (-16.9 to 3.8)  | -15.7% (-25.5 to -6.1) | -12.9% (-23.6 to -3.0) | 10.5% (-23.7 to 91.5)    | 109.7% (-1007.9 to 1091.5)  |
| Caribbean                    | -3.3% (-5.4 to -1.1)   | -5.6% (-10.5 to -0.7) | -3.5% (-5.8 to -1.0)   | -5.7% (-11.5 to 0.1)   | 7.5% (-18.4 to 25.5)     | 0.9% (-79.5 to 60.3)        |
| Central Europe               | -6.7% (-12.5 to -0.4)  | 5.5% (-3.1 to 13.8)   | -6.9% (-12.5 to -1.3)  | 4.8% (-3.3 to 12.8)    | 2.6% (-22.2 to 94.0)     | -12.8% (-230.7 to 273.2)    |

|                              |                        |                        |                        |                        |                          |                             |
|------------------------------|------------------------|------------------------|------------------------|------------------------|--------------------------|-----------------------------|
| Eastern Europe               | -7.0% (-11.4 to -2.6)  | -6.0% (-12.9 to 0.8)   | -4.5% (-9.6 to 0.7)    | 4.9% (-3.8 to 13.7)    | -36.3% (-120.2 to 4.1)   | -182.8% (-1323.0 to 550.5)  |
| North Africa and Middle East | -0.3% (-0.9 to 0.3)    | 0.2% (-0.6 to 1.2)     | -0.4% (-0.8 to 0.1)    | 0.0% (-0.6 to 0.7)     | 6.3% (-425.7 to 278.2)   | -98.7% (-788.4 to 492.7)    |
| Central Asia                 | -4.5% (-7.5 to -1.2)   | -5.6% (-12.0 to 0.4)   | -4.3% (-7.4 to -1.0)   | -5.7% (-11.9 to 0.3)   | -4.1% (-45.6 to 60.1)    | 1.3% (-105.6 to 226.5)      |
| South Asia                   | -0.5% (-0.9 to -0.1)   | 0.7% (-1.5 to 2.9)     | -0.1% (-0.5 to 0.3)    | 3.4% (0.2 to 7.3)      | -74.1% (-235.1 to -28.9) | 378.0% (-2344.5 to 2677.2)  |
| Southeast Asia               | -1.4% (-2.4 to -0.4)   | -3.6% (-6.0 to -1.1)   | -0.9% (-2.1 to 0.3)    | -0.3% (-2.9 to 2.6)    | -34.6% (-143.7 to 8.2)   | -92.8% (-272.4 to -43.9)    |
| East Asia                    | -2.4% (-3.8 to -1.1)   | -1.8% (-6.2 to 2.4)    | -2.0% (-3.1 to -0.8)   | 2.0% (-3.4 to 8.0)     | -19.9% (-40.8 to -1.9)   | -209.1% (-1633.1 to 2121.7) |
| Oceania                      | -0.8% (-2.4 to 1.5)    | 0.0% (-5.0 to 6.0)     | -1.2% (-2.8 to 1.2)    | -1.1% (-6.7 to 5.4)    | 54.7% (-799.2 to 734.0)  | -2414.0% (-772.1 to 828.8)  |
| High-income Asia Pacific     | -12.8% (-20.3 to -5.5) | -14.3% (-22.6 to -5.8) | -12.3% (-19.1 to -5.0) | -13.9% (-21.9 to -5.8) | -4.3% (-15.9 to 6.6)     | -3.0% (-13.9 to 9.7)        |
| High-income North America    | -8.5% (-14.0 to -2.9)  | -10.6% (-17.9 to -3.1) | -8.4% (-13.9 to -2.8)  | -9.7% (-17.3 to -2.3)  | -1.5% (-29.5 to 18.1)    | -8.1% (-55.1 to 19.4)       |
| Western Europe               | -8.2% (-16.4 to 0.5)   | 3.2% (-4.5 to 10.9)    | -10.6% (-18.5 to -2.6) | -4.0% (-12.3 to 4.3)   | 29.7% (-165.3 to 302.0)  | -225.9% (-2248.4 to 1892.4) |
| Australasia                  | -12.3% (-20.7 to -4.0) | 5.8% (-3.4 to 14.7)    | -13.5% (-21.5 to -5.5) | -2.5% (-12.3 to 7.9)   | 9.5% (-15.9 to 76.0)     | -143.1% (-1248.0 to 873.2)  |

Data in parentheses are 95% uncertainty intervals. PAF=population attributable fraction; SDI= Socio-demographic Index; GBD= Global Burden of Disease, Injuries, and Risk Factors Study.
